# Supplementary material
Source: PubMed Central journal article supplement (PMC2746483)
Supplement: NIHMS131482-supplement-MS_131482_Supplementary_Data.pdf [file NIHMS131482-supplement-MS_131482_Supplementary_Data.pdf]

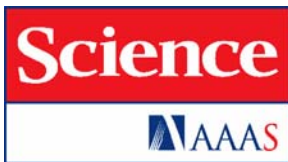

[www.sciencemag.org/cgi/content/full/1168978/DC1](http://www.sciencemag.org/cgi/content/full/1168978/DC1)

Supporting Online Material for

**Genome-Wide Analysis in Vivo of Translation with Nucleotide  
Resolution Using Ribosome Profiling**

Nicholas T. Ingolia,\* Sina Ghaemmaghami, John R. S. Newman, Jonathan S. Weissman

\*To whom correspondence should be addressed. E-mail: [ingolia@cmp.ucsf.edu](mailto:ingolia@cmp.ucsf.edu)

Published 12 February 2009 on *Science* Express  
DOI: 10.1126/science.1168978

**This PDF file includes:**

Materials and Methods

Figs. S1 to S25

Tables S1 to S8

References

# Supporting material for: Genome-wide *in vivo* analysis of translation with sub-codon resolution by ribosome profiling

Nicholas T. Ingolia, Sina Ghammaghami,  
John R. S. Newman, Jonathan S. Weissman

January 25, 2009

## 1 Materials and Methods

### 1.1 Overview of Library Preparation

When converting small RNAs into a sequenceable DNA library, it was critical to capture different RNA sequences with similar efficiency. Sequence biases in the library generation protocol would distort the observed frequency of different small RNAs, thereby changing the measured abundance of different ribosomal footprints and mRNA fragments. Randomly primed complementary DNA (cDNA) synthesis, which is typically used for transcriptome deep sequencing (*S1*, *S2*), was not a viable option as ribosomal footprints were too short. Furthermore, differential priming can lead to biases (*S3*).

We tested various strategies for attaching linkers to the 3' and the 5' termini of RNA fragments, either as RNA or as first-strand cDNA. In miRNA studies, short RNA fragments are converted to sequenceable DNA using the single-stranded RNA ligase T4 Rnl1 (*S4*). However, this enzyme shows significant sequence specificity (*S5*). We found that we achieved the most even sequence coverage using polyadenylation of RNA fragments to generate a primer site for first-strand cDNA synthesis (*S6*) (fig. S3). We also found that intramolecular ligation of first-strand cDNA gave better results than using either intermolecular or intramolecular RNA ligation for 5' linker attachment (data not shown).

### 1.2 Experimental Procedures

#### Media and Growth Conditions

Yeast strain BY4741 (MATa *his3Δ1 leu2Δ0 met15Δ0 ura3Δ0*) was grown in YEPD at 30 C with vigorous shaking. Cultures were grown from an initial OD<sub>600</sub> of roughly 0.03 to mid-log phase, with an OD<sub>600</sub> of 0.6 to 0.7.

Amino acid starvation was performed by pelleting cells for 5 min at 5000×g at 30 °C in a Sorvall SLA-3000 rotor, removing all media, and resuspending cells in an equal volume of pre-warmed SD media without amino acids. Cells were returned to 30 °C with vigorous shaking for 20 min.

### **Extract and Total RNA Preparation**

Cycloheximide was added to a final concentration of 100  $\mu\text{g} / \text{ml}$  and growth was continued for 2 min at 30 °C with vigorous shaking. Cells were harvested by filtration onto 0.45  $\mu\text{m}$  pore size nitrocellulose filters (Whatman).

The majority of the sample was resuspended in ice-cold polysome lysis buffer (20 mM Tris pH 8.0, 140 mM KCl, 1.5 mM  $\text{MgCl}_2$ , 100  $\mu\text{g} / \text{ml}$  cycloheximide, 1% Triton) and dripped into a conical 50 ml tube filled with, and immersed in,  $\ell\text{N}_2$ . Frozen cells were pulverized for six cycles, each of 3 min. at 15 Hz, on a Retsch MM301 mixer mill. Sample chambers were pre-chilled in  $\ell\text{N}_2$  and re-chilled between each pulverization cycle.

Pulverized cells were thawed and cell debris was removed by centrifugation at 4 °C, 3000× g for 5 min. The supernatant was recovered and clarified by spinning at 4 °C, 20000× g for 10 min. The supernatant beneath the buoyant membrane layer was recovered from this second spin. Aliquots of this extract were flash-frozen in  $\ell\text{N}_2$ . Typical yields were 0.80 ml of extract with  $A_{260}$  of 400-500.

A small amount of each sample was resuspended in ice-cold total RNA lysis buffer (10 mM EDTA, 50 mM NaOAc pH 5.5) and total RNA was purified by the hot acid phenol method. Typical yields were 1 mg of total RNA.

### **Random RNA Fragmentation**

Poly-(A)+ mRNA was purified from 50  $\mu\text{g}$  total RNA using magnetic oligo-dT DynaBeads (Invitrogen) according to the manufacturer's instructions. Purified RNA was eluted in 20  $\mu\text{l}$  10 mM Tris pH 8.0. This was mixed with an equal volume of 2× alkaline fragmentation solution (2 mM EDTA, 10 mM  $\text{Na}_2\text{CO}_3$ , 90 mM  $\text{NaHCO}_3$ , pH  $\approx$  9.3) and incubated 20 min at 95 °C. Fragmentation reactions were mixed with 0.56 ml ice-cold stop / precipitation solution (final 300 mM NaOAc pH 5.5, plus GlycoBlue (Ambion) as a coprecipitant), followed by isopropanol precipitation by standard methods.

### **Ribosome Footprinting**

An aliquot of 100  $A_{260}$  units of extract was split in half. A footprinting sample was treated with 750 U of *E. coli* RNase I (Ambion), while an undigested control was treated with 40 U of SUPERase-In RNase inhibitor (Ambion). Both samples were incubated 1 hour at room temperature with gentle mixing.

Sucrose density gradients (10%-50% w/v) were prepared in Sw41 ultracentrifuge tubes (Fisher) using a BioComp Gradient Master (BioComp Instruments) according to the manufacturer's instructions. Sucrose solutions were prepared in polysome gradient buffer (20 mM Tris pH 8.0, 140 mM

KCl, 5 mM MgCl<sub>2</sub>, 100 μg / ml cycloheximide, 0.5 mM DTT, 20 U / ml SUPERase-In). Digested and control samples were loaded onto gradients, which were spun for 3 hours at 35,000 rpm, 4 °C in an Sw40 rotor. Gradients were fractionated at 0.75 ml / min using an Isco gradient fractionation system which continually monitored A<sub>260</sub> values, and fractions corresponding to 30 s intervals were collected.

Fractions representing the monosome peak were pooled to produce a monosome sample and RNA was purified by the hot acid phenol method. RNA was resuspended in 0.50 ml 10 mM Tris pH 8.0 with 50 U SUPERase-In and short RNA was purified by loading the sample on a Microcon YM-100 microconcentrator (Millipore) and centrifuging for 28 min at 510×g at room temperature in a tabletop centrifuge. Roughly 0.425 ml of flow-through was recovered and RNA was precipitated by standard methods.

### RNA Size Selection

Both fragmented mRNA and monosome samples were size-selected by gel electrophoresis. Samples were first dephosphorylated in a 10 μl reaction with final 1× T4 polynucleotide kinase buffer without ATP, 10 U SUPERase-In, and 10 U T4 polynucleotide kinase (NEB). Dephosphorylation was carried out for 1 hour at 37 °C, and the enzyme was then heat-inactivated 10 min at 75 °C.

Dephosphorylation reactions, along with a synthetic 28 base RNA oligonucleotide (oNTI199, 5'-AUGUACACGGAGUCGACCCGCAACGCGA), were mixed with 2× Novex TBE-Urea sample prep buffer (Invitrogen) and briefly denatured, then loaded on a Novex denaturing 15% polyacrylamide TBE-urea gel (Invitrogen) and run according to the manufacturer's instructions. The gel was stained with SYBR Gold (Invitrogen), then the 28 nt region was excised. The gel was physically disrupted and RNA was recovered by soaking overnight in gel elution buffer (300 mM NaOAc pH 5.5, 1 mM EDTA, 0.1 U / μl SUPERase-In). The gel debris was removed from the eluate using a Spin-X column (Corning) and RNA was precipitated with GlycoBlue as a coprecipitant by standard methods.

### cDNA Synthesis

Gel-purified RNA fragments were resuspended in 10 mM Tris pH 8 and quantified using the BioAnalyzer Small RNA assay (Agilent). A sample of 10-20 pmol of RNA was denatured briefly, then used to prepare a poly-(A) tailing reaction in 6.6 μl with 1× poly-(A) polymerase buffer, ATP in 40-50:1 molar ratio with RNA, 0.75 U / μl SUPERase-In, and 3 U *E. coli* poly-(A) polymerase (NEB). Tailing was carried out for 30 min at 37 °C.

Reverse transcription was carried out using oNTI223 (5'-pGATCGTCTGGACTGTAGAACTC-TØCAAGCAGAAGACGGCATAACGATTTTTTTTTTTTTTTTTTTTTTVN) where the initial p indicates 5' phosphorylation, Ø indicates the abasic dSpacer furan and V, N indicate degenerate nucleotides. A 5.0 μl aliquot of tailed RNA was supplemented with 570 nmol Tris 8.0, 8.2 nmol each dNTP, 50 pmol oNTI223 primer, and water to 14.25 μl. This was heated 3 min at 75 C, then chilled on ice. Then, 10 U SUPERase-In, 82 nmol DTT, and 164 U SuperScript III (Invitrogen) was added, and reverse transcription was performed for 30 min at 48 °C. RNA was eliminated by

adding 1.8  $\mu$ l 1M NaOH and incubating 20 min at 98 °C. The reaction was then neutralized with 1.8  $\mu$ l 1M HCl.

Reverse transcription products were separated on a 10% polyacrylamide TBE-urea gel as described above. The extended first-strand product band was excised and DNA was recovered as described above, using DNA gel elution buffer (300 mM NaCl, 1 mM EDTA).

First-strand cDNA was circularized by resuspending DNA in 4.5  $\mu$ l circularization mix (final in 5.0  $\mu$ l: 1 $\times$  CircLigase Buffer, 50  $\mu$ M ATP, and 2.5 mM MnCl<sub>2</sub>) and adding 0.5  $\mu$ l CircLigase (Epicentre). Circularization was performed for 1 hour at 60 °C, and the reaction was heat-inactivated 10 min at 80 °C.

Circular single-stranded DNA was relinearized by adding 6.25  $\mu$ l relinearization supplement (50 mM KCl, 1 mM DTT) followed by 12.5 U APE 1 (NEB). The reaction was incubated 1 hour at 37 °C. Relinearized ssDNA was run on a Novex 10% polyacrylamide TBE-urea gel (Invitrogen) as described above. The relinearized product band was excised—the circularized form migrates more slowly—and the DNA was recovered as described above.

## Sequencing

Single-stranded template was amplified by PCR using the Phusion High-Fidelity enzyme (NEB) according to the manufacturer's instructions. The oligonucleotide primers oNTI200 (5'-CAA-GCAGAAGACGGCATA) and oNTI201 (5'-AATGATACGGCGACCACCGACAGGTTTCAGAGTTCTACAGTCCGACG) were used to create sequenceable DNA, *i.e.*, DNA with Illumina cluster generation sequences on each end and a sequencing primer binding site. PCR was carried out with an initial 30 s denaturation at 98 °C, followed by 8 - 14 cycles of 10 s denaturation at 98 °C, 10 s annealing at 60 °C, and 5 s extension at 72 °C. Several reactions, with different numbers of amplification cycles, were performed. Reactions were separated on a non-denaturing 8% polyacrylamide TBE gel as described above. In order to avoid distortions of the relative abundance of different products, it was desirable to stop amplification while it was still in a linear range. This was accomplished by selecting between reactions performed with different numbers of cycles to maximize the recovery of 115 b.p. product, but requiring that oligonucleotides remain to indicate that the reaction had not reached saturation. Product DNA from this optimal cycle was recovered as described above and quantified using the Agilent BioAnalyzer DNA 1000 assay. DNA was then sequenced on the Illumina Genome Analyzer 2 according to the manufacturer's instructions, using 3 to 5 pM template for cluster generation and sequencing primer oNTI202 (5'-CGACAGGTT-CAGAGTTCTACAGTCCGACGATC)

## Nuclease Protection Assay

A DNA fragment consisting of the first 500 bp of *TDH3* was amplified from yeast genomic DNA using the Phusion High-Fidelity polymerase with oligonucleotide primers oNTI156 (5'-ATGGTT-AGAGTTGCTATTAACGG) and oNTI158 (5'-*TAATACGACTCACTATAGGGCGAAAGCATCGTT-GATAACC*). The product contained a T7 RNA polymerase promoter site on the reverse-complement strand, shown in italics. This product was used as a template for *in vitro* transcription using the

MAXIscript kit (Ambion) according to the manufacturer’s instructions, using 5.0  $\mu\text{l}$  [ $\alpha^{32}\text{P}$ ] UTP, 3000 mCi / mmol, 40 mCi / ml as the only source of UTP.

Nuclease protection was performed using the mirVana miRNA detection kit (Ambion) according to the manufacturer’s instructions. Equal volumes of different monosome fractions were used, corresponding to 2.8  $\mu\text{g}$  to 8.4  $\mu\text{g}$  RNA per sample, and 7.7  $\mu\text{g}$  total RNA was used for the control. The RNA concentration in each sample, including the no-RNA control, was equalized to 8.4  $\mu\text{g}$  by the addition of *Drosophila* S2 mRNA. Hybridization was performed overnight at 42 °C, and digestion was performed with 1:100 RNase A/T1 for 40 minutes at 37 °C. Products were analyzed by electrophoresis on a 15% polyacrylamide TBE-Urea gel, along with denatured 10 bp ladder (Invitrogen) radiolabeled with T4 polynucleotide kinase (NEB) according to the manufacturer’s instructions. Gels were visualized by exposing a PhosphorImager screen (Molecular Dynamics) for 16 hours.

### 1.3 Data Analysis

Data analysis was performed using a collection of custom programs written in Haskell.

#### Sequencing Analysis

Primary data from the Illumina Genome Analyzer 2 was analyzed using the GAPipeline v0.3.0 to obtain sequencing reads, with matrix and phasing parameters estimated from a  $\phi\text{X}$  control lane. Duplicate read sequences were then collapsed and counted (scripted by our PROCESSRAW program) to generate a file of distinct sequences and occurrence counts.

#### Alignment of Sequences

Read sequences were composed of a variable-length region of captured RNA fragment sequence followed by a homopolymer A tail. Preliminary experiments indicated that essentially all RNA fragments were at least 21 nucleotides long. Beyond 21 nucleotides, a base might be derived from the captured RNA fragment or from the homopolymer tail. Alignments were thus seeded based on the first 21 nucleotides and then extended to encompass subsequent fragment-derived nucleotides and determine the length of the fragment.

The first 21 nucleotides of each sequencing read were aligned with the target sequence library using SOAP v1.10 (S7), allowing up to 3 mismatches and recovering all hits when there were multiple equally good possibilities. SOAP alignments from the first 21 nucleotides were subsequently processed to find the full length of the captured RNA sequence (using our ALIGNFROMSOAP program). All possible fragment lengths  $l$  were tested by taking  $l$  library sequence bases followed by an  $\text{A}_{36-l}$  tail and finding the number of mismatches between this constructed sequence and the actual sequencing read,  $s(l)$ . When the genomic alignment region ended in A bases, it was not possible to determine whether these nucleotides were derived from the captured RNA fragment or from the added homopolymer linker. This resulted in multiple library sequence fragment lengths  $\arg \max_l s(l) = \ell^* = \{l_1, \dots, l_i\}$  with equally good alignment scores. We addressed this ambiguity by finding the shortest and longest fragment lengths that achieved the best alignment score,

( $\min \ell^*$ ,  $\max \ell^*$ ). When the genomic sequence alignment ended in a non-A base, followed by another non-A base that was absent from the captured RNA fragment, there was a unique best-scoring fragment length.

The best SOAP alignment of the first 21 nucleotides is not guaranteed to identify the optimal genomic alignment of a full-length read. Sequencing errors in the first 21 nucleotides might result in a better alignment to one site in the genome while the full 28 nucleotide read would align better to a different site. However, empirically, these misalignments would represent an extremely small fraction of all reads. Very few alignments were changed when all candidate genomic sites with 3 or fewer mismatches in the first 18 nucleotides were aligned by dynamic programming against the actual sequencing read. Furthermore, the first 21 nucleotides have low error rates relative to later nucleotides.

Sequencing reads were filtered and alignments were performed in the following order:

**Degenerate Read Elimination** Reads in which 18 or more of the first 22 nucleotides were 'A' bases were eliminated.

**rRNA Alignment** Reads that were not eliminated as degenerate were aligned against a library of yeast rRNA sequences. Reads with any alignment against rRNA were eliminated from further consideration.

**Transcript Alignments** Non-degenerate, non-rRNA reads were aligned against three different libraries: yeast genomic sequences, yeast processed protein-coding genes, and yeast processed non-coding RNAs. These alignments were performed independently on all reads.

**Splice Alignments** Non-degenerate reads with no alignment against any yeast genomic sequences were re-aligned against the library of processed protein-coding transcripts.

This process was automated with our SOAPALIGN script. All alignments were carried out against a recent version of the yeast genome, downloaded from the Saccharomyces Genome Database (SGD, <http://www.yeastgenome.org/>) on 22 June 2008. Statistics on sequence alignment are reported in table S1.

Alignments were further filtered to eliminate those with more than 2 total mismatches, reads whose shortest possible genomic length was less than 20 nucleotides ( $\min \ell^* < 20$ ), and reads with more than 18 A bases in the first 24 bases. These reads made up a small fraction of all reads, but constituted a large fraction of reads that mapped to intergenic, low-complexity sites. For analyses besides the length distribution of sequencing reads, only fragments whose length could be 22 to 32 nucleotides inclusive ( $\min \ell^* \leq 32$ ,  $\max \ell^* \geq 22$ ) were used.

### Assigning RNA Fragments to Genomic Features

As yeast have relatively little splicing, genomic alignments were used to assign sequencing reads to transcribed features. Protein-coding genes, introns, and non-coding RNA sequences were taken from SGD annotations. Flanking 5' and 3' UTRs of protein-coding genes were taken from the

Nagalakshmi *et al.* transcriptome sequencing data (S1). Genomic alignments of sequencing reads were assigned to these features based on the position of the 5' end of the alignment.

| Feature             | Fragment 5' End               |                                   |
|---------------------|-------------------------------|-----------------------------------|
|                     | Start                         | End                               |
| Protein-coding gene | 16 nt before first base       | 14 nt before last base            |
| 5' UTR              | start of annotated UTR        | 17 nt before first base of CDS    |
| 3' UTR              | 13 nt before last base of CDS | 28 nt before end of annotated UTR |
| intron              | first base of intron          | 8 nt before last base of intron   |
| Non-coding RNA      | 12 nt before first base       | 12 nt after last base             |

Ambiguously aligned reads were handled by empirically identifying features that were subject to ambiguous alignments. Ambiguous features were those where > 20% of aligning mRNA fragments could be mapped to a second site in the genome as well. Overlapping features had > 20% of aligning mRNA fragments mapped to sites where other features overlapped. Only unambiguous and non-overlapping features were used in subsequent analyses. Dubious ORFs are excluded from this analysis as they often overlap verified ORFs.

| Feature Type        | Ambiguous | Overlapping | Unambiguous,<br>Not Overlapping |
|---------------------|-----------|-------------|---------------------------------|
| Protein-coding gene | 398       | 37          | 5287                            |
| Intron              | 18        | 9           | 224                             |
| 5' UTR              | 56        | 54          | 3544                            |
| 3' UTR              | 145       | 59          | 4560                            |

Our QUANTIFYEXPRESSION program reads our alignment data files, determines which features are ambiguous or overlapping, and quantifies RNA fragments aligning to unambiguous, non-overlapping features.

### Quantifying mRNA and Ribosome Density

Read density was computed by scaling read counts for each feature by feature length and by the total number of CDS-aligned reads. Feature length was the number of nucleotide positions where, if the 5' end of a sequencing read fell on that nucleotide, the read would be assigned to the feature. For spliced protein-coding genes, where reads spanning splice junctions would not align to genomic sequences, 27 nt was subtracted from the feature length to account for nucleotide positions where a read would span the junction and thus be unalignable. Alignments mapping to any non-coding RNA were discarded. Otherwise, ambiguous reads were assigned to all possible features. Note that these ambiguous reads account for no more than 20% of total reads for a given feature.

If the absolute number of sequencing reads for a features is small, then the relative sampling error would be large. This sampling error can be modeled with simple counting statistics, controlled by the number of reads, which adds to error from biological variability and sample preparation. In particular, when a transcript is present at equal frequency in both samples, if the total number of



counts between the two samples is sufficiently large, then it is very unlikely that sampling error will result in a large skew between the two samples. However, if the total number of counts is small, then most may be derived from one sample by chance. To minimize the effect of this error, an empirical cutoff of 128 total counts was selected based on replicate measurements of mRNA density (figs. S5 and S7). This criterion is particularly effective at excluding the false appearance of regulation. When a transcript is dramatically more abundant in one condition than another, one sample may have few counts, resulting in a substantial error in the measured ratio. The existence and direction of regulation can still be inferred reliably, but the quantitative change is sensitive to sampling error from the low-abundance sample.

When comparing replicates of mRNA or ribosome density in protein-coding genes, in fig. S5 and Fig. 2D, reliably quantified features were those genes with at least 128 total read counts between the two replicates. When computing translation as the ratio of ribosome density to mRNA density, in Fig. 2E and Fig. 3B, reliable features needed at least 128 total read counts between mRNA and ribosome samples. In both cases, the ratios were normalized to set the mean ratio across all reliable protein-coding genes to 1.

When quantifying read density on untranslated features, in Fig. 3A, reliable features were those pairs of untranslated region and corresponding protein-coding gene where there were at least 128 sequencing reads in total. The majority of 3'UTRs and introns had no ribosome footprint reads. In order to estimate an upper bound on their translation, an 0.5 read pseudocount was used to compute a ribosome footprint density.

When comparing transcriptional and translational changes in Fig. 4, four pair-wise comparisons—mRNA fragments between two conditions, ribosome footprints between two conditions, and ribosome footprints to mRNA fragments in each condition—had to be reliable in that the total number of reads between the two compared values was at least 128. Changes in transcription and translation were scaled uniformly to set the median ratio across all genes to 1.

### **Averaging Position-Specific mRNA and Ribosome Density**

When averaging sequencing read density at different codon positions, in Fig. 2F, profiles of read counts at each codon were computed separately for each gene. Densities were then normalized for each gene based on the average density in the first 151 codons, and any gene with fewer than 64 total reads in this region was excluded. The average normalized density was computed at each position by taking the mean normalized density across all genes that were long enough to include that position in the coding sequence, with each gene given equal weight.

### **uORF Identification**

Canonical uORFs that initiate translation at an AUG codon were identified by finding AUG codons in annotated 5' UTRs and determining the extent of the following open reading frame. Non-AUG uORFs were identified similarly, but potential start codons were identified by finding a codon with a single mismatch from AUG with an initiation context score of at least 0.01, which identified 1615 non-AUG uORFs. AUG uORFs were considered to have a good initiation context when the score was at least 0.001. Initiation context scores were computed using a weight matrix model devised

by Miyasaka based on the start codon context of highly-expressed genes (S8). The weight matrix scores six nucleotides before the start codon as well as three nucleotides after.

### **uORF Quantitation**

Footprints were assigned to uORFs when they started no more than 14 nucleotides before the start of the uORF, and ended no more than 15 nucleotides before the end of the uORF or 21 nucleotides before the start of the downstream protein-coding gene. Thus, when a uORF overlapped a protein-coding gene or created a 5' extension, reads were attributed to the main CDS rather than the uORF. In a few cases, the upstream end of the uORF was less than 14 nucleotides from the beginning of the annotated 5' UTR and some reads were assigned to the uORF but not to the 5' UTR. Many uORFs overlap each other, so ribosome footprints could often be assigned to multiple uORFs in a single 5' UTR. Ribosome footprints assigned to one or more canonical AUG uORFs in a given 5' UTR were counted first. Those that could not be assigned to any canonical AUG uORF were then assigned to a predicted non-AUG uORF if possible. This procedure assigns ribosome footprints to standard AUG uORFs rather than non-AUG uORFs whenever possible.

A 5' UTR was considered to be ribosome-occupied when at least 1 rpM ribosome footprints were assigned to it. When at least half of those footprints were assigned to canonical AUG uORFs, the translation of that 5' UTR was attributed to these AUG uORFs. Similarly, when at least half were assigned to predicted non-AUG uORFs, the translation was attributed to these non-canonical uORFs. When neither of these categories accounted for a majority of the ribosome footprints, the translation was classified as unknown.

A 5' UTR was classified as highly-transcribed when the mRNA fragment density was at least 100 rpKM and it was at least 50% of the mRNA density of the associated protein-coding gene. The highly-transcribed uORFs were simply the AUG uORFs in these 5' UTRs, noting that some UTRs had more than one uORF. A specific uORF was considered to be highly translated when it accounted for at least half of the total 5' UTR ribosome footprints and when the ratio of ribosome footprint density to mRNA fragment density specifically in the uORF was at least 0.00914. This ribosome to mRNA ratio was more than 3 standard deviations below the translation ratio of the median protein-coding gene.

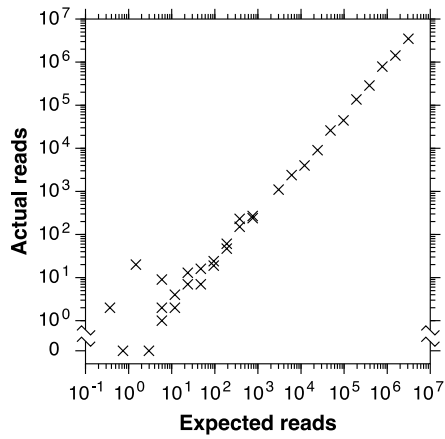

**Figure S1.** Quantifying sequences by deep sequencing. 32 synthetic DNA templates, each with a distinct sequence, were generated and quantified. Different templates were then mixed into a pool serially, so that oligos added early in the series would be at very low abundance in the final mixture. The dilution protocol was used to compute what fraction of the total pool each synthetic template represented, which then gave the expected fraction of total sequencing reads for that template sequence. The sample was then analyzed by deep sequencing and the number of reads derived from each synthetic template sequence was counted. The number of deep sequencing reads corresponds well to the concentration of the DNA template within the limits of statistical counting error for low-abundance templates.

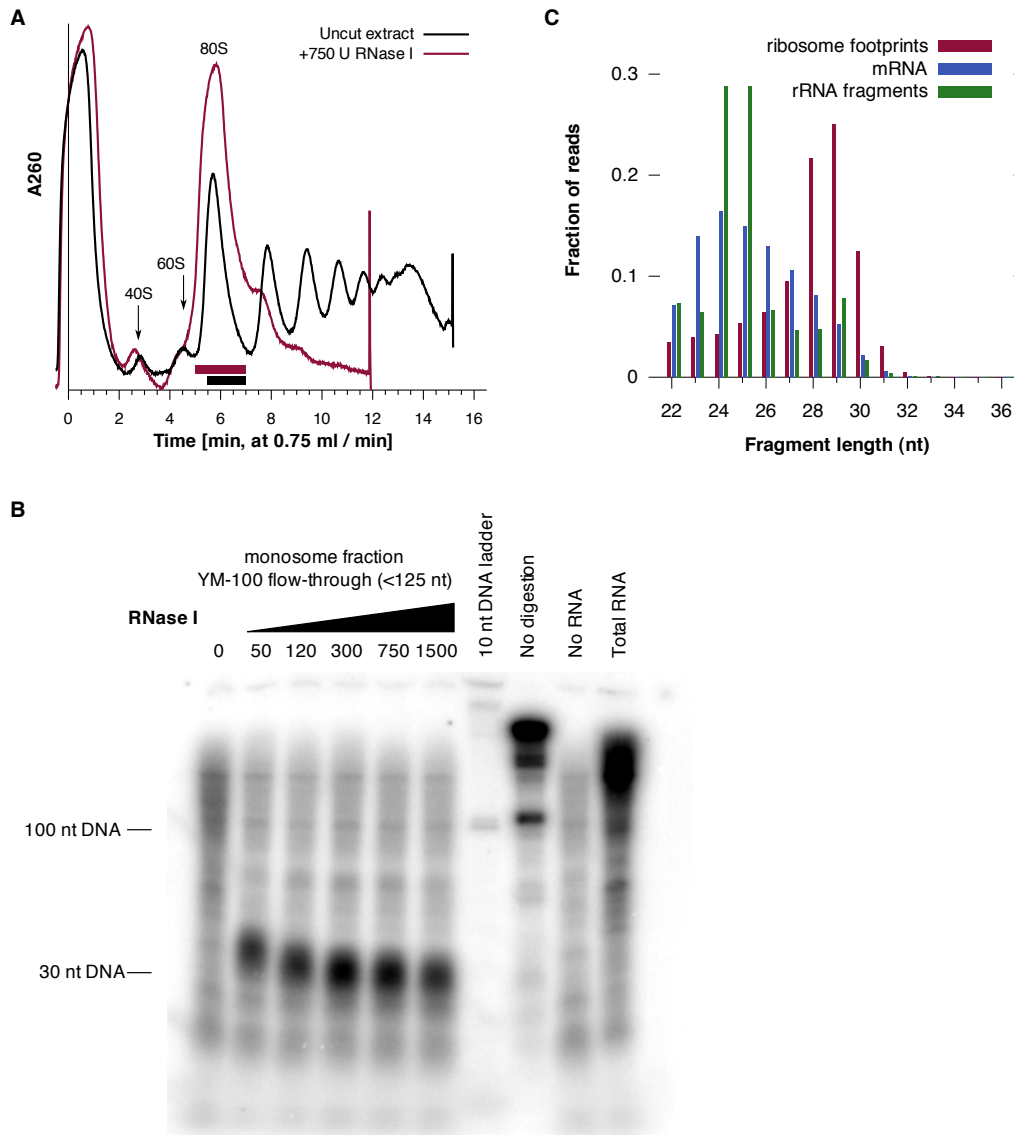

**Figure S2.** Footprinting translating ribosomes on mRNA. **(A)** Sucrose density gradient analysis of nuclease-digested extracts. The solid boxes indicate the fractions pooled for the monosome sample. **(B)** Nuclease protection assay showing ribosome-protected mRNA fragments. The probe is antisense to the 5'-most 500 nt of *TDH3*. The total RNA sample was not filtered, and thus contains long mRNAs. The no digestion sample shows the undigested probe. **(C)** Length distribution of ribosome footprint sequences. Ribosome footprints have a distinctive length which corresponds to the size of the fragments seen in **(B)**. Only reads whose length was unambiguous were included. The rRNA fragments are the nuclease-generated rRNA contamination in the ribosome footprint sample. The mRNA fragments are from a randomly-fragmented sample that was size-selected and prepared in parallel to the footprint sample.

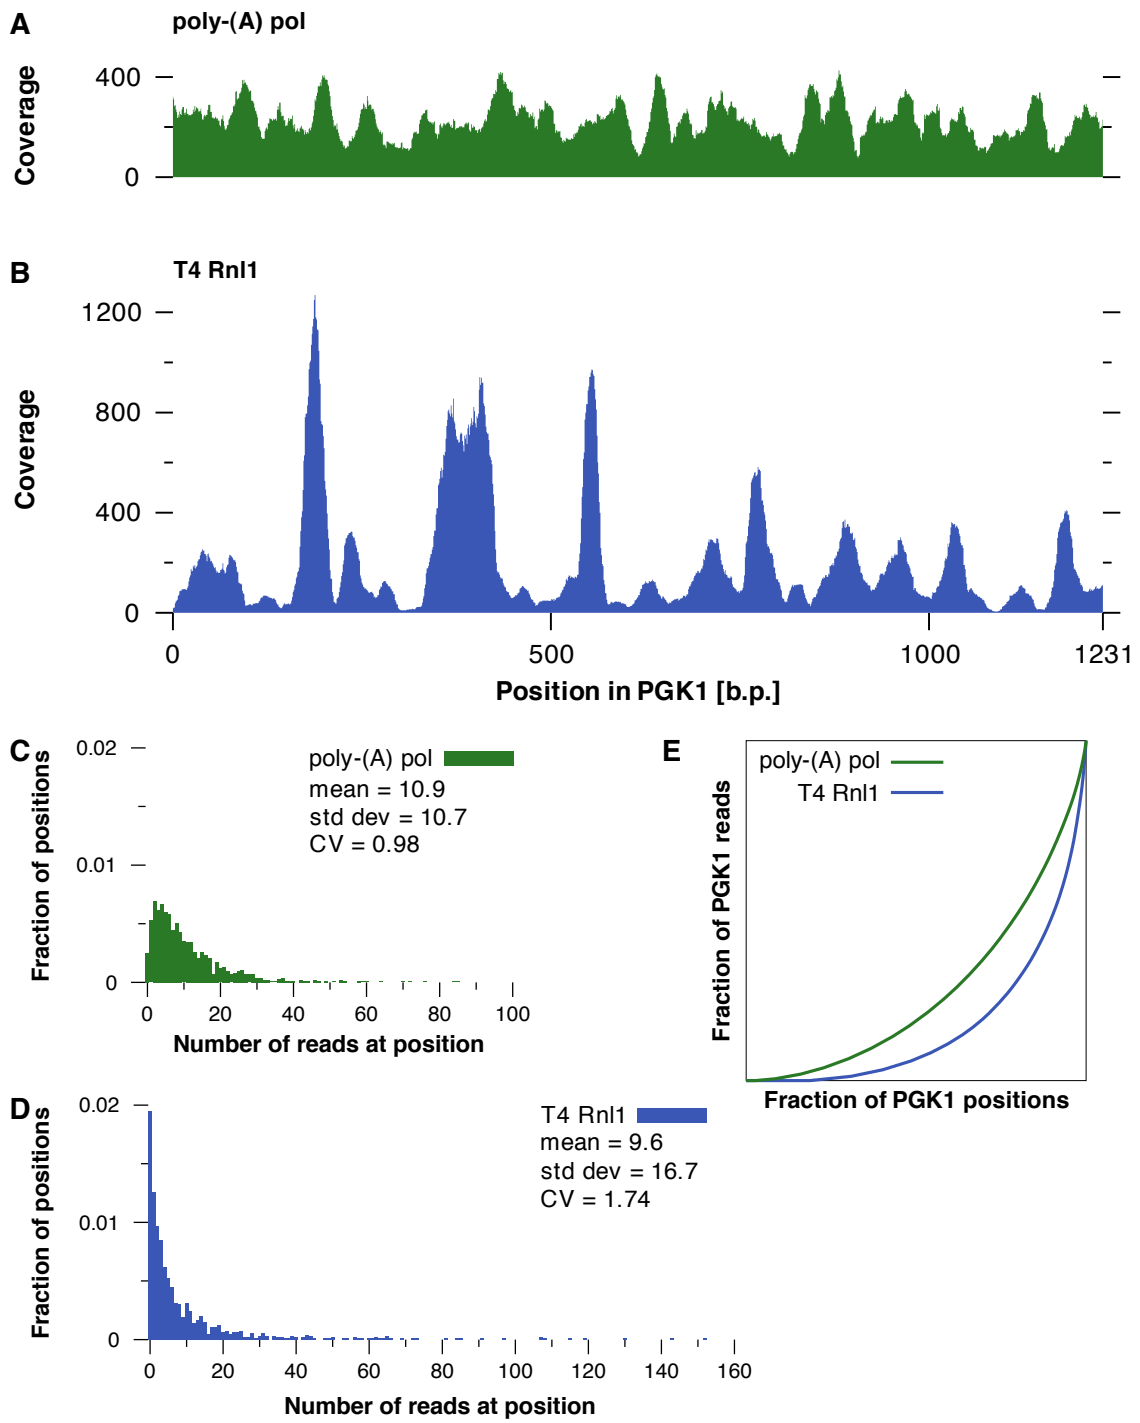

Figure S3

**Figure S3.** Quantifying and minimizing bias in converting RNA into sequenceable DNA. (A and B) Comparison of coverage from different 3' end capture strategies. The poly-(A) polymerase sample in (A) was generated as described in Fig. 1A, while the T4 Rnl1 sample used T4 Rnl1 to ligate an oligonucleotide linker and was otherwise the same. Coverage of sequencing reads on the *PGKI* CDS was approximated with a 21 nt moving average window, as this was the sequence length available for (B). (C and D) Histogram of sequence read density. The number of sequencing reads starting at each specific nucleotide position in the *PGKI* coding sequence was counted. The histogram value at  $n$  shows what fraction of nucleotide positions in the CDS have exactly  $n$  sequencing reads starting at that position. Uneven coverage results in a large number of nucleotide positions with few reads and a small number nucleotide positions with many reads. The mean, standard deviation, and CV of the number of sequencing reads starting at a given position is also quantified for each sample. (E) Lorenz curve of read starts. This curve represents the cumulative distribution of sequencing reads shown in (C) and (D). It shows the fraction of total reads accounted for by a given fraction of positions in the gene. For example, at  $x = 0.1$ , the  $y$  value of the curve shows the fraction of sequencing reads that occupy the 10% of the positions in the CDS with the lowest occupancy. Perfectly even coverage would give a diagonal line. Deviations below this diagonal line indicate biases in the capture, or the generation, of mRNA fragments during the construction of the sequencing library. They indicate that a small fraction of positions in the CDS account for a large fraction of total reads aligning to that CDS.

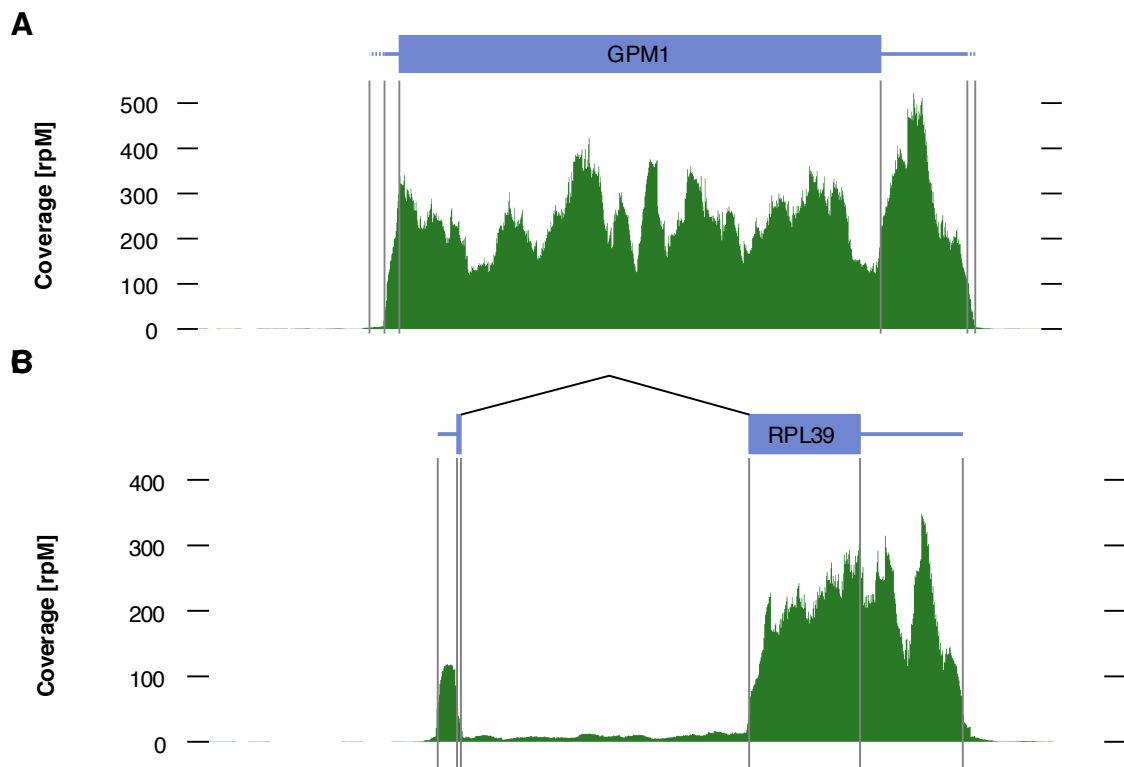

**Figure S4.** RNA-Seq using small mRNA fragments. (**A** and **B**) Read coverage of two well-expressed yeast genes. The UTR boundaries are taken from a large-scale full-length cDNA analysis (*S9*). Coverage varies only 3- to 4-fold within coding sequences, and is clearly much lower in the *RPL39* intron.

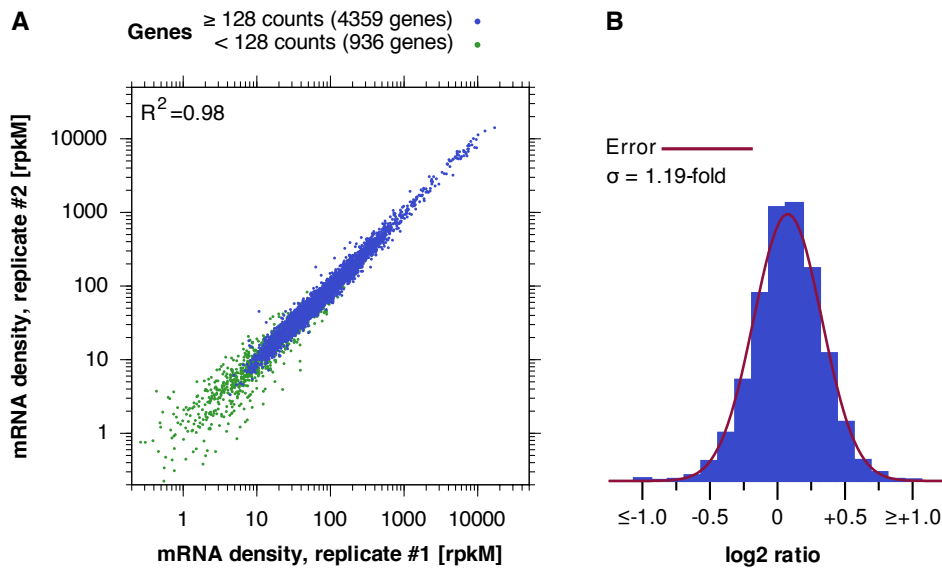

**Figure S5.** Reproducibility of mRNA abundance measurements between biological replicates. (A) mRNA fragment densities in two fully independent replicates. Density is expressed in terms of reads per kilobase per million (rpKM), which is corrected for total reads and CDS length. Genes with at least 128 total reads counted have low relative error from counting statistics (fig. S7) and thus represent the intrinsic error in the technique, which cannot be overcome by more sequencing. (B) Inter-replicate error distribution. Histogram of log<sub>2</sub> ratios between the replicates for genes with low counting error ( $\geq 128$  reads total), along with the normal error curve (mean = 0.076, std dev = 0.252 in log<sub>2</sub> units).



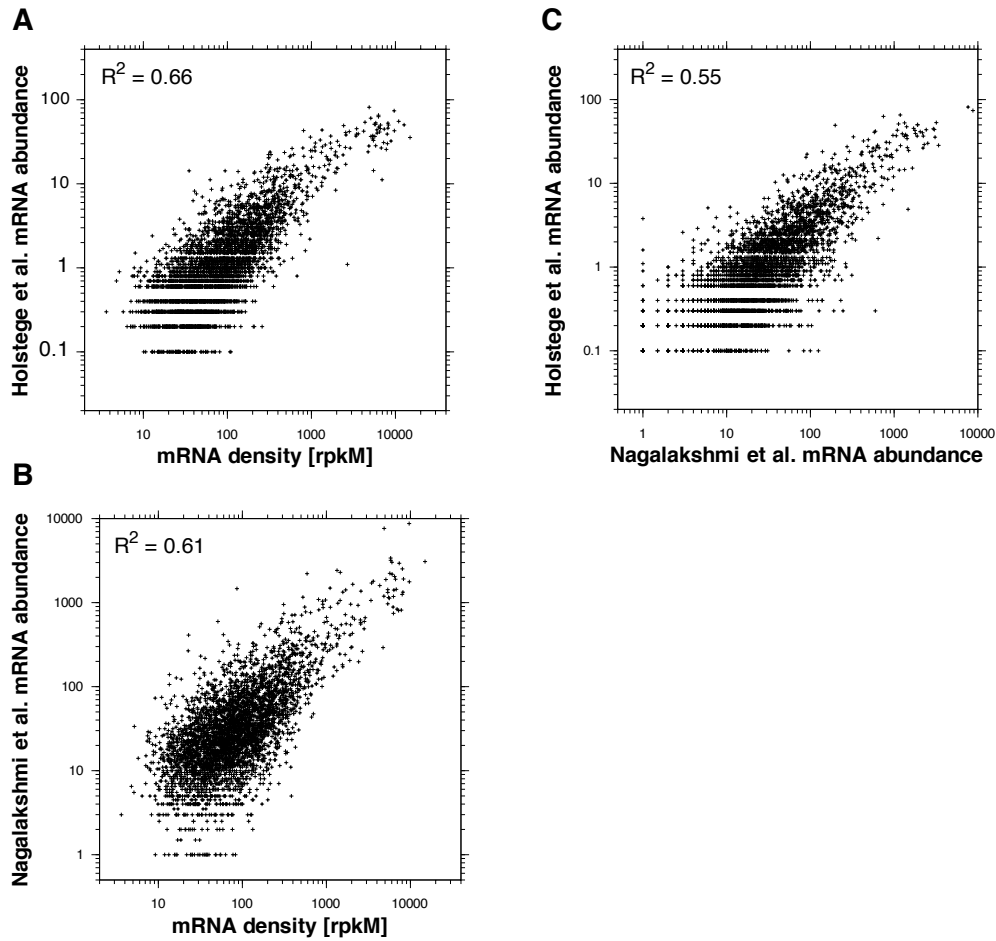

**Figure S6.** Correlation between various genome-wide mRNA abundance measurements. (A) Comparison between our mRNA abundance measurements and microarray data. Our measurement of mRNA abundance correlates well with the Holstege *et al.* data set (*S10*), which used single-channel microarrays normalized against genomic DNA to compare abundance between different mRNAs. (B) Comparison between our mRNA abundance measurement and an alternate transcriptome sequencing approach. The Nagalakshmi *et al.* data set (*S1*) used deep sequencing of unfragmented mRNAs and quantified only reads in a 30 bp window upstream of the stop codon. (C) Comparison between the two previous whole-genome measurements.

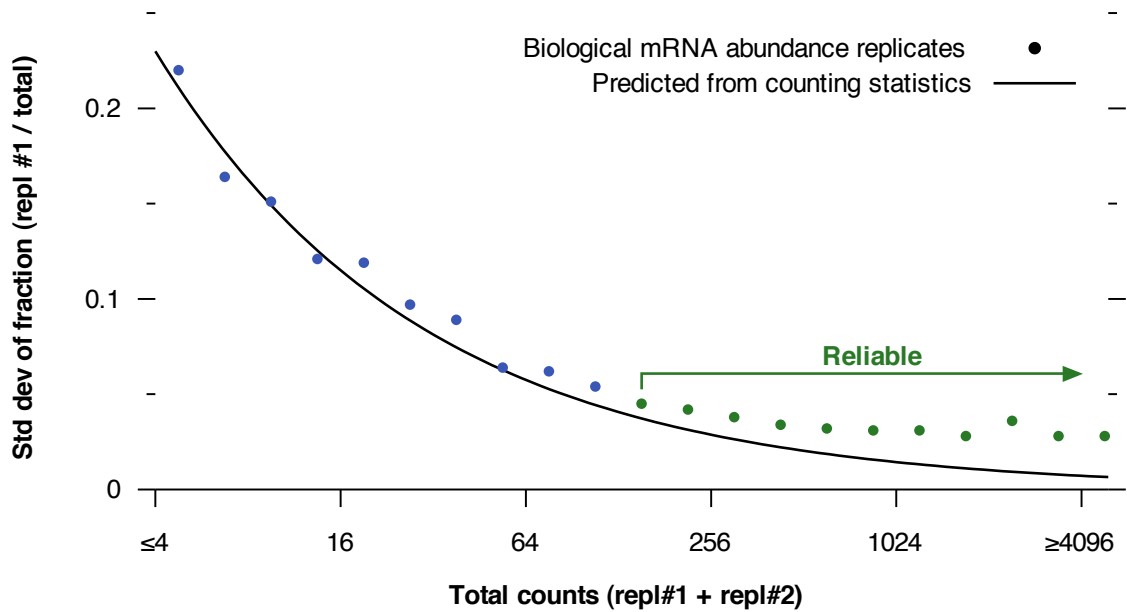

**Figure S7.** Effects of counting statistics on error in quantification. Fully independent biological replicates of mRNA abundance were used to measure reproducibility. For each gene, the fraction of the total number of sequencing reads that derived from replicate #1 was calculated. Genes were then binned based on the total number of reads and the standard deviation of fractions was computed across each bin. The standard deviation was predicted for counting statistics using simple binomial partitioning of the total number of reads between replicates #1 and #2. When few total counts are available, the effects of binomial partitioning dominate the inter-replicate variation, but when many counts are obtained, other sources of error predominate. A threshold of 128 total counts was chosen as a point where the inter-replicate variation approached its infinite-counts asymptote and counting statistics contributed little.

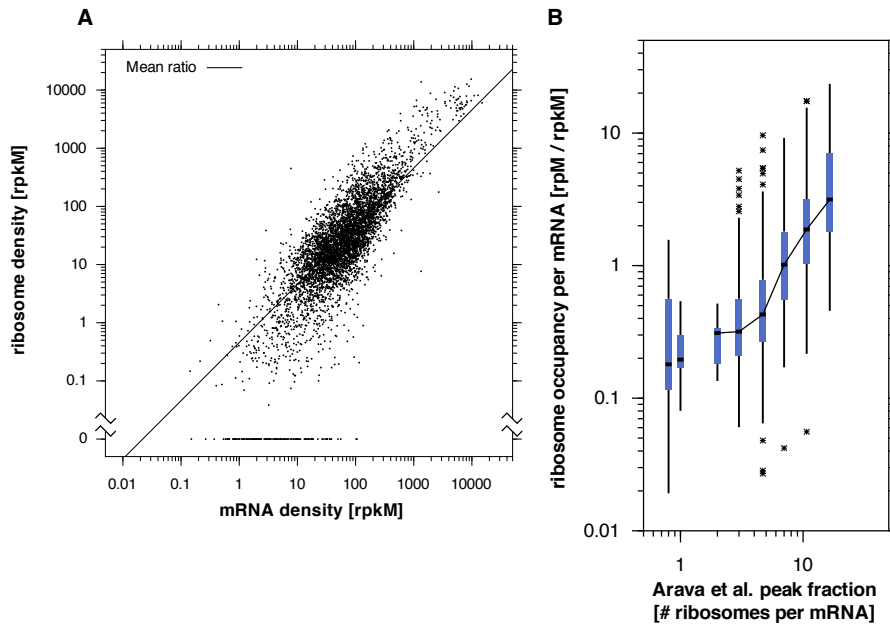

**Figure S8.** Ribosome density as a measure of protein synthesis. (A) Ribosome footprint abundance correlates well, but not perfectly, with mRNA abundance. Genes with more abundant mRNA are also translated more highly. The average ratio of footprint density to mRNA fragment density was computed from genes where the ratio could be reliably determined (Fig. S7) (B) Translational efficiency as a function of length. Genes were binned based on length and the median translational efficiency for each length class was normalized against the 1kb length class. (C) Ribosome occupancies of genes classified by whole-genome polysome profiling. A previous study quantified relative mRNA abundance in eight polysome fractions and found a distinct peak of mRNA abundance for each of 2128 genes (S11). Ribosome occupancy per transcript, which is the quantity directly measured by polysome profiling, was estimated for genes peaking in each of these fractions by scaling total ribosome counts by mRNA fragment density. Genes peaking in heavier polysome Vfractions tend to have higher ribosome occupancy. For the set of genes peaking in a polysome fraction, we show a five-number summary (minimum, lower quartile, median, upper quartile, and maximum) of ribosome occupancy values, along with the outliers.

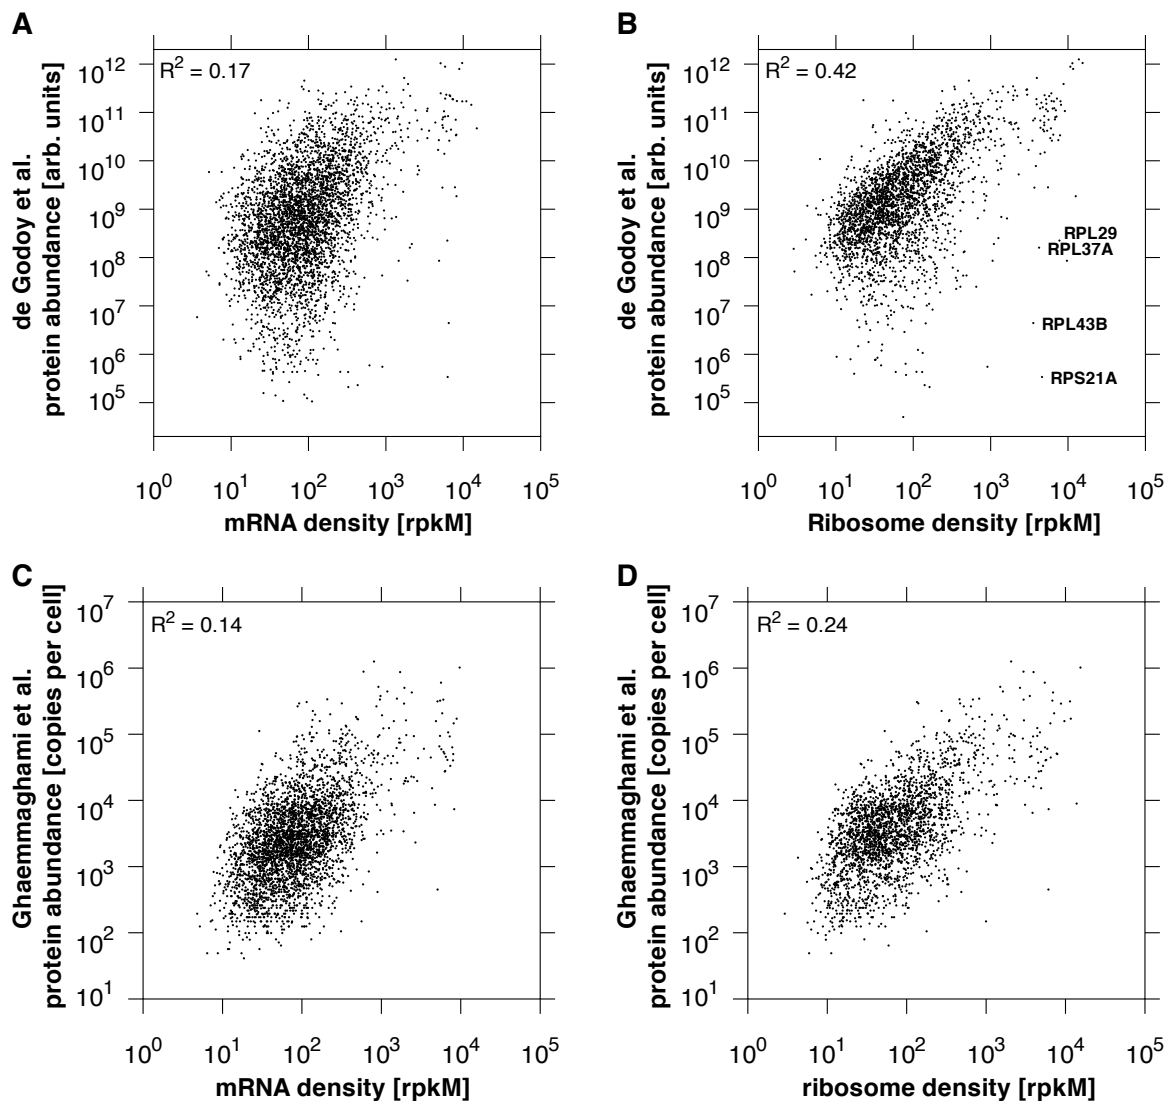

**Figure S9.** Correlation between protein abundance and gene expression measurements. (A and B) Protein abundance by mass spectrometry versus mRNA and ribosome density. Protein abundance (*S12*) correlates better with ribosome density than mRNA abundance. Furthermore, many outliers are ribosomal proteins, including the single-copy Rpl29p, that are likely to be high-abundance proteins and thus represent errors in the mass spectrometry data. Protein abundance was derived from summed ion intensity in haploid samples from de Godoy *et al.* (C and D) As (A) and (B), using protein abundance from Western blotting against TAP-tagged proteins from Ghaemmaghmi *et al.* (*S13*)

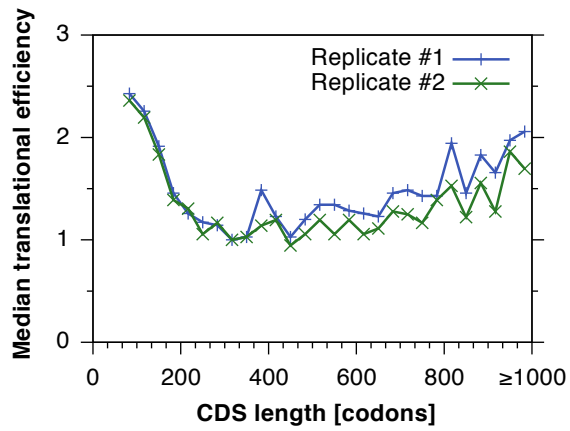

**Figure S10.** Translational efficiency as a function of length. Genes were binned based on the length of their coding sequence and the median translational efficiency was computed over the genes in each length class. Efficiencies were normalized against the 1kb length class.

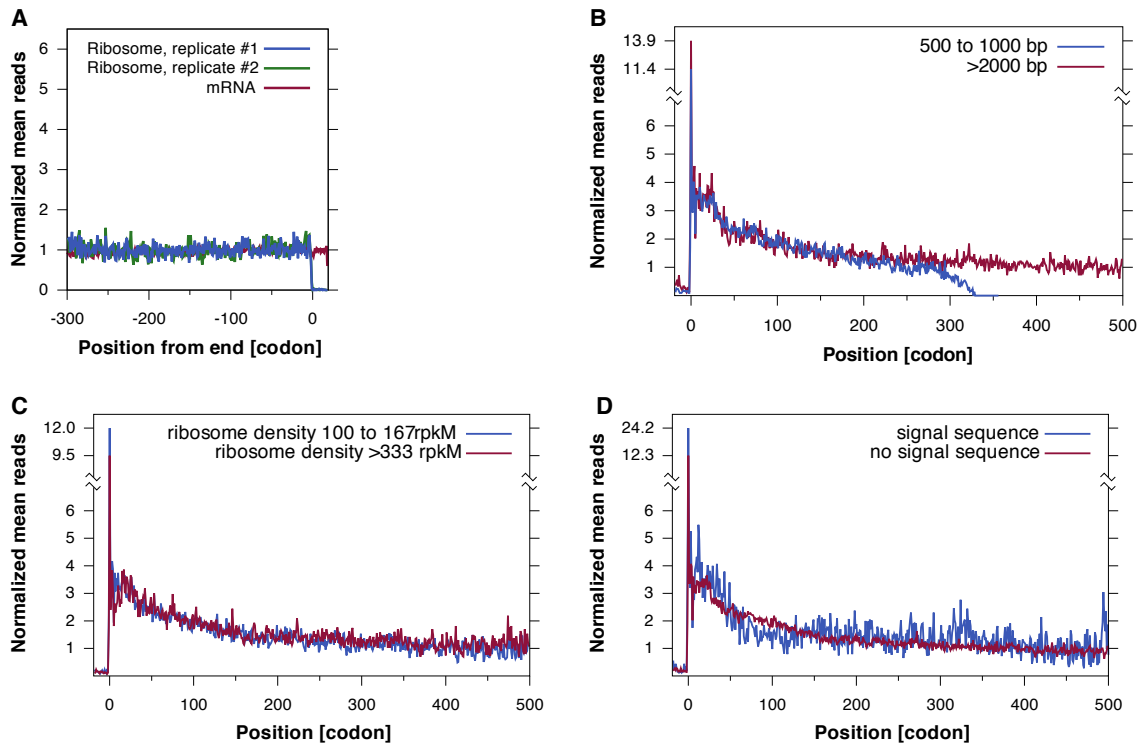

**Figure S11.** Read density as a function of position for subsets of genes. **(A)** Read density as a function of position relative to the end of the coding sequence. As in Fig. 2F, though only genes that are at least 500 codons long were included in the average to avoid any effect of the start of the gene on the window examined. Ribosome occupancy appears to be uniform at the end of the gene, then stops abruptly at the stop codon. **(B)** Comparison of short (500 - 1000 bp) and long ( $\geq 2000$  bp) genes. **(C)** Comparison of moderately-expressed (100 to 167 rpkM ribosome footprint density) and highly-expressed ( $\geq 333$  rpkM ribosome footprint density) genes. **(D)** Comparison of genes with and without predicted N-terminal signal sequences. The overall three-phase trend in ribosome density appears to be independent of length, expression level, and the presence of a signal sequence.

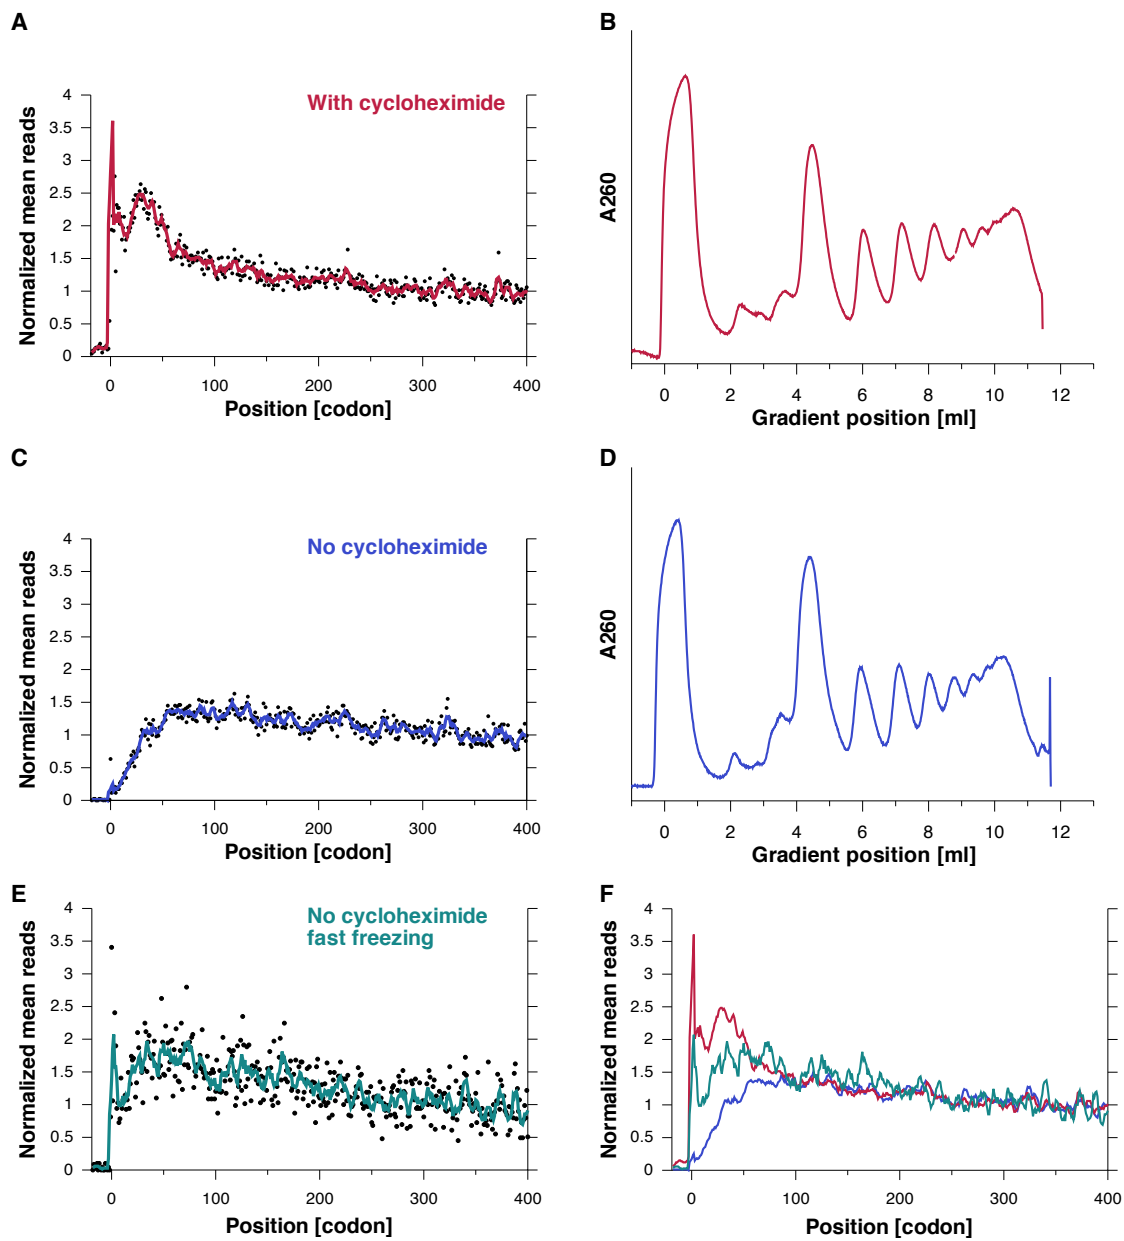

Figure S12.

**Figure S12.** Effects of cycloheximide and translational run-off on average ribosome density. **(A)** Density of ribosome footprints as a function of position. Density profiles for well-expressed genes were independently normalized and averaged with equal weight, as described above. Black dots show per-codon densities and solid lines show a 5-codon moving average centered on that position. Data were taken from a preliminary experiment using an earlier version of our library generation protocol. **(B)** Polysome analysis of cycloheximide-treated extract. An undigested portion of the extract sample used to prepare the library analyzed in (A) was analyzed by sucrose density gradient, as in fig. S2. **(C)** Density of ribosome footprints in extracts prepared without cycloheximide. As in (A), except that cycloheximide was excluded from all aspects of the experiment. Cells were harvested without cycloheximide treatment, resuspended in ice-cold cycloheximide-free lysis buffer, and dripped into  $\ell\text{N}_2$ . Extracts were analyzed on sucrose density gradients that contained no cycloheximide. Stress responses induced by harvesting cells out of rich media and resuspending them in cold, nutrient-free lysis buffer rapidly inhibit translation initiation. In the absence of cycloheximide treatment to immobilize ribosomes, elongation proceeds for a short time, thereby strongly depleting ribosomes from the first 50 - 100 codons. The nearly complete loss of ribosomes from the beginning of the gene argues that the excess ribosome density at the 5' end of CDSes represents elongating ribosomes and not, *e.g.*, terminally stalled translation events. However, the average ribosome density beyond codon 100 is indistinguishable from that of cycloheximide-treated cells. Furthermore, ribosome density is still several-fold higher at the initiation codon than at positions immediately downstream. **(D)** Cycloheximide-free polysome analysis. As in (B), using an undigested portion of the extract analyzed in (C). **(E)** Density of ribosome footprints in extracts prepared without cycloheximide and frozen very quickly. As in (C), except for modifications to the cell harvesting protocol designed to minimize run-off elongation. Specifically, cells were harvested by filtration and the cell paste was quickly scraped off of the filter and plunged directly into  $\ell\text{N}_2$ . Polysome lysis buffer was subsequently dripped into the  $\ell\text{N}_2$  as well. Frozen cells and lysis buffer were kept frozen and pulverized together, and then processed as in (C). There is a much more modest loss of ribosomes from the beginning of genes, consistent with the model that a shorter delay between cell harvesting and freezing diminishes run-off elongation. There is a clear excess of ribosome density starting around codon 30 and by codon 50 the profile is indistinguishable from that of the cycloheximide-treated sample. Both the high ribosome density at the start codon and the elevated ribosome density over the first 100-200 codons can be reproduced in samples that are never treated with cycloheximide. **(F)** Comparison of average density profiles between the three samples.



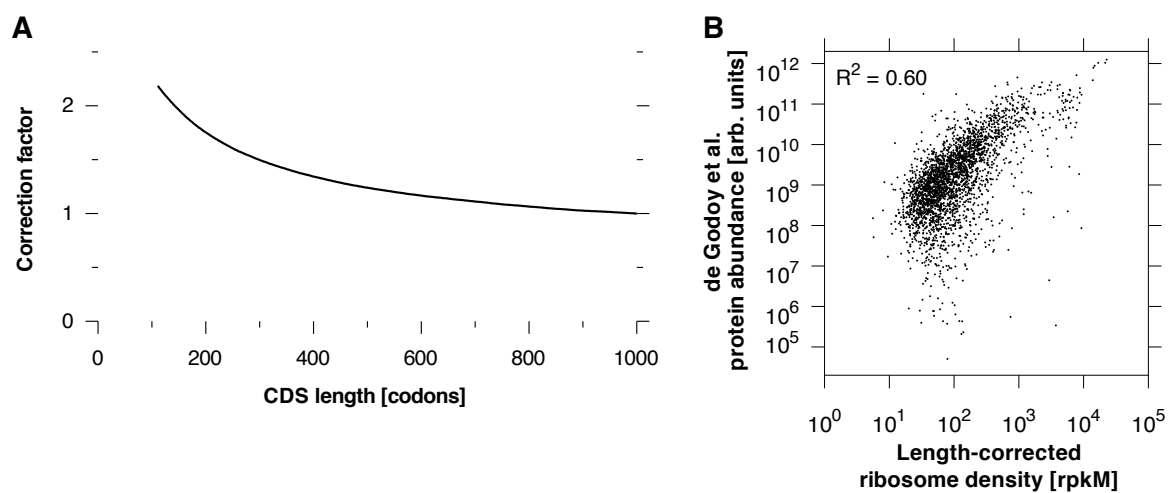

**Figure S13.** Protein synthesis estimates are improved by ribosome density correction. **(A)** Ribosome density correction factor as a function of length. The length correction factor at length  $L$  codons is the average ribosome density on the interval  $[1, L]$  as shown in Fig. 2F, normalized to the average over  $[1, 1000]$ . **(B)** Protein abundance by mass spectrometry versus length-corrected ribosome density. Correcting the ribosome density on each gene by the factor shown in (A), based on its length, substantially improves the correlation with protein abundance.

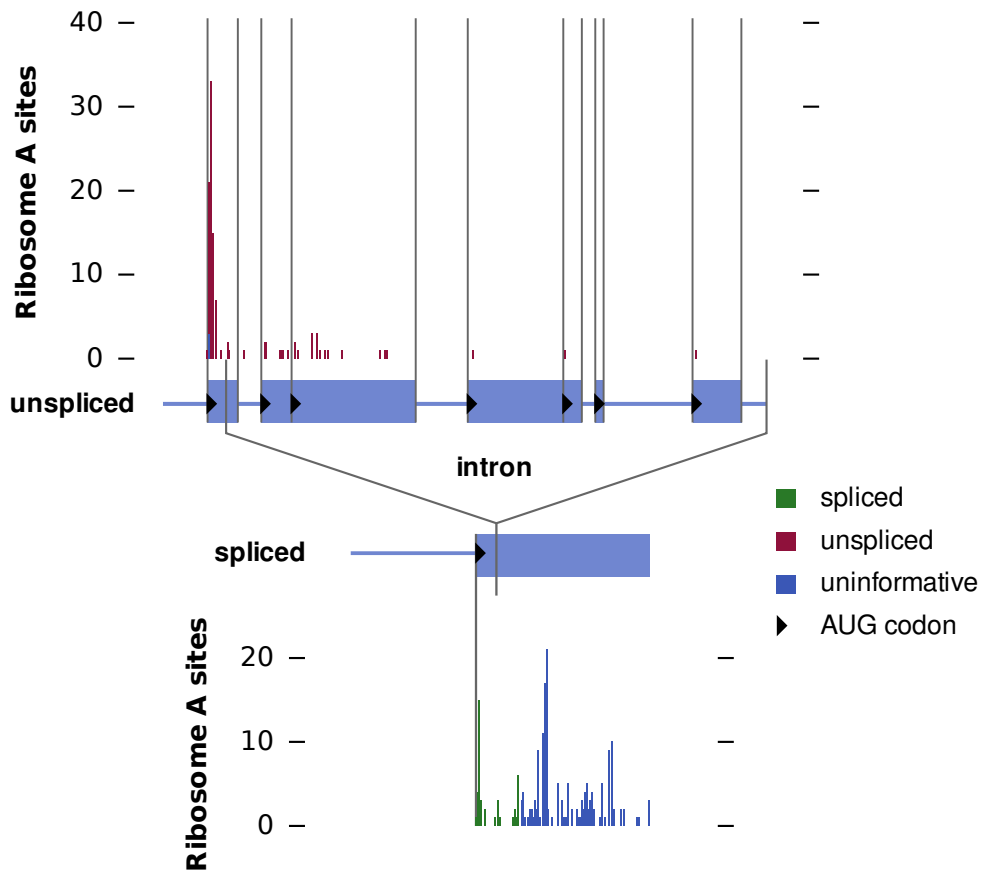

**Figure S14.** Reads aligning to spliced and unspliced *RPL22B*. Translation of the intron can be explained by reinitiation or leaky scanning following the normal AUG, which starts a 7 codon ORF in the unspliced form. Almost all intronic ribosome footprints are derived from the next downstream ORF in the intron, with three remaining reads distributed exactly at the sites of three other AUG codons. Only reads that were at least 27 nucleotides long, with no more than one mismatch, were used. These restrictions allow us to assign reads beginning on the start codon to either the spliced or the unspliced form because the 5' splice site is only 12 nucleotides downstream of the beginning of the gene. The downstream AUGs in the intron sequence are indicated, along with the next in-frame stop. Whenever a second AUG occurs in an open reading frame, it is in-frame, so there are no overlapping reading frames.

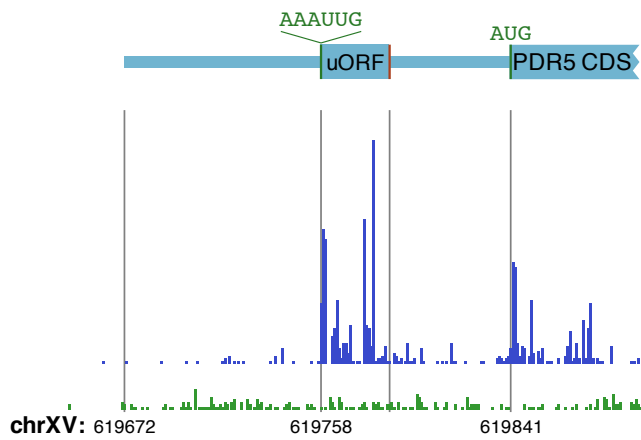

**Figure S15.** Ribosome and mRNA density showing non-AUG uORFs in *PDR5*. The proposed *AAAUUG* translational initiation site is shown, along with the subsequent open reading frame and stop codon (indicated by a vertical line).

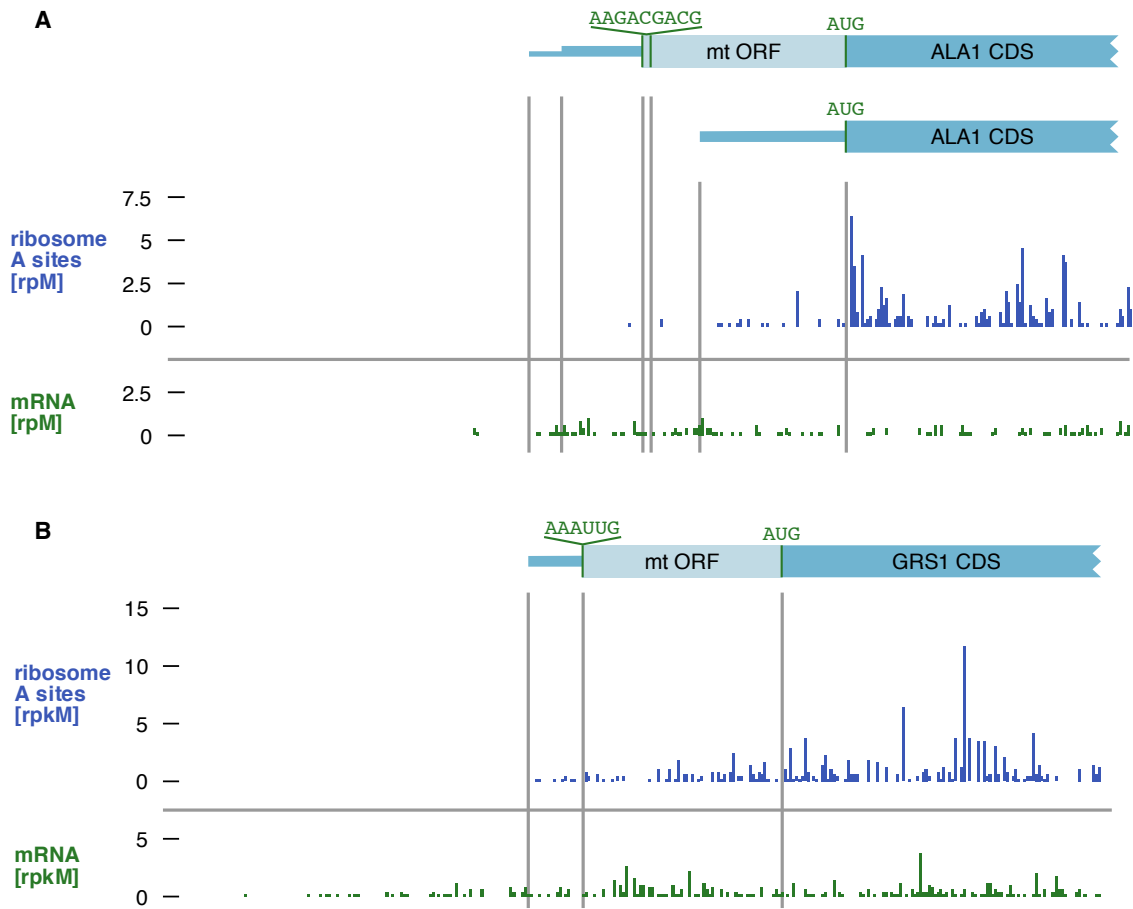

**Figure S16.** Known non-AUG initiation in yeast tRNA synthetases. **(A)** Ribosome footprint and mRNA fragment densities in *ALA1* transcripts. There are three characterized transcription start sites, resulting in two substantially different isoforms, depicted. In the longer isoforms, translation initiates at one of a pair of ACG codons and produces a protein with a mitochondrial signal sequence, “mt ORF.” In the shorter isoform, translation initiates at the canonical AUG to produce a cytosolic protein. **(B)** Ribosome footprint and mRNA fragment densities in *GRS1* transcripts. The mapped transcription start site is shown. Translation sometimes initiates at a UUG codon, resulting in a protein with a mitochondrial signal sequence, “mt ORF.”

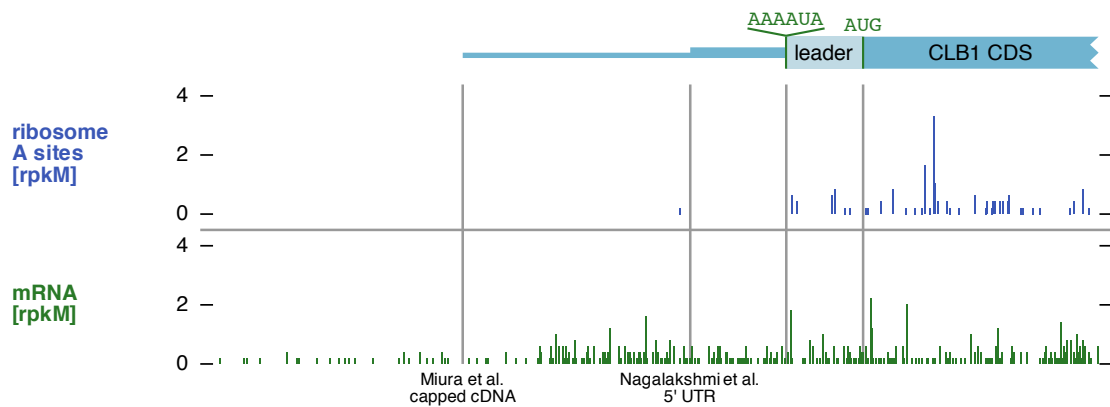

**Figure S17.** Novel non-AUG initiation in *CLB1* produces an N-terminal extension. Transcription start sites based on capped cDNA sequencing and transcriptome deep sequencing are indicated, but mRNA abundance suggests that most transcripts start between these two points. Translation initiation at a non-AUG site in-frame with the canonical AUG would explain essentially all ribosome footprints on the *CLB1* 5' UTR. Translation of this highly conserved region would add a 17 amino acid N-terminal extension to Clb1p.

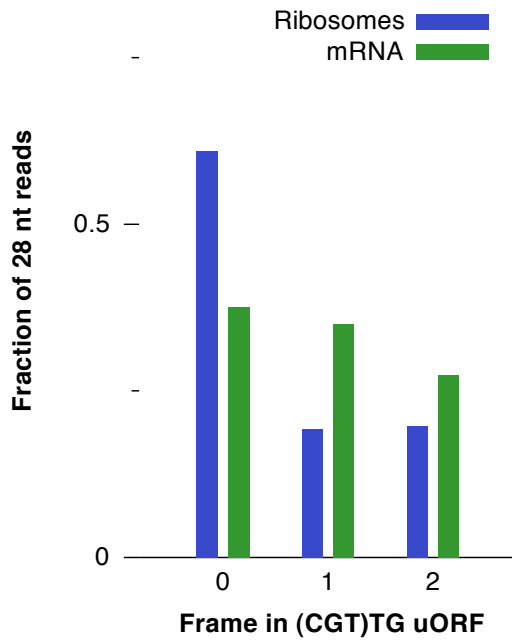

**Figure S18.** Position of ribosome footprints relative to proposed non-AUG start sites. The (C/G/U)UG candidate uORFs showed the highest translation efficiency in log-phase growth. The reading frame of unambiguous 28 nt sequencing reads relative to a proposed initiator codon was computed for all reads that mapped to the 12 codons downstream of the start site. Ribosome-protected fragments show a strong bias to start on the first nucleotide of a codon, in contrast to random mRNA fragments.

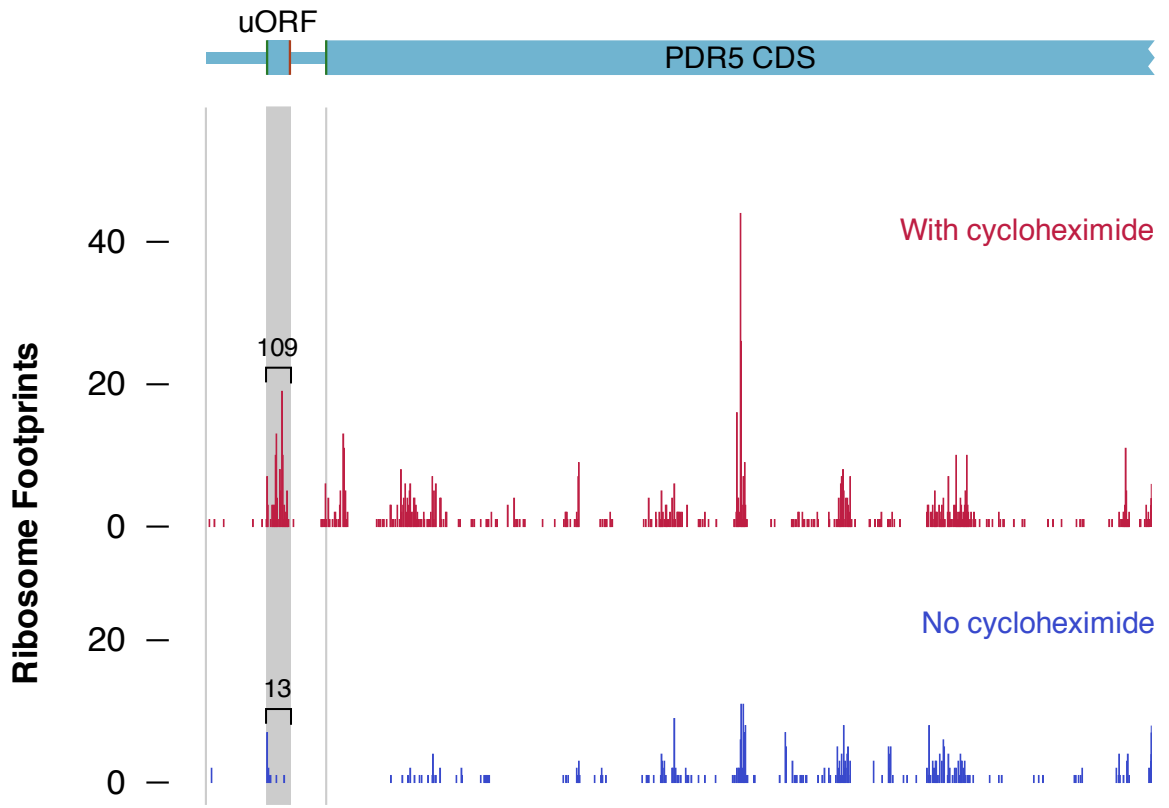

**Figure S19.** Translational run-off of non-AUG uORFs. Counts of ribosome-protected fragments from matched samples prepared with and without cycloheximide (fig. S12) are shown for the 5' end of the *PDR5* transcript. In a sample prepared without cycloheximide, ribosome-protected fragments are lost from the proposed non-AUG uORF in the 5' UTR, suggesting that these fragments are derived from actively elongating ribosomes. Ribosome footprints are also lost from the 5' end of the CDS, consistent with the average pattern of ribosome density seen in these samples.

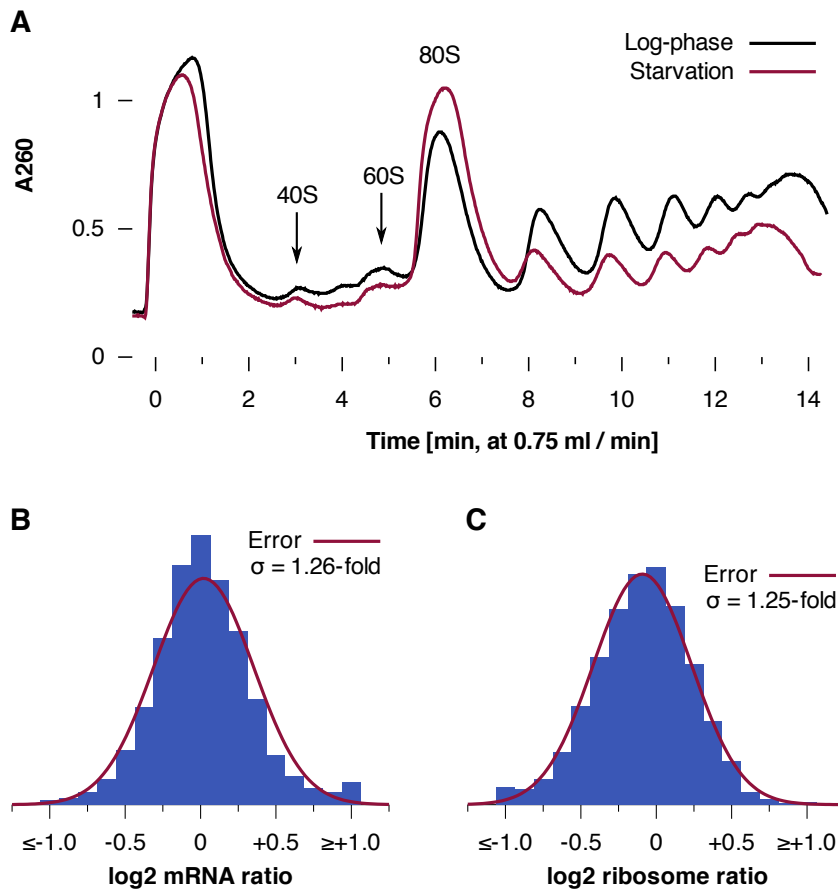

**Figure S20.** Ribosome footprinting of cells subjected to acute amino acid starvation. **(A)** Polysome profiles from a culture split in half, with one half transferred to minimal media without amino acids for 20 min. There is a substantial loss of polysomal ribosomes, with a corresponding increase in monosomal ribosomes, consistent with previous reports. **(B)** Reproducibility of mRNA abundance measurements following starvation. Histogram of log<sub>2</sub> ratios between replicates for genes with at least 128 reads, along with the normal error curve (mean = 0.021, std dev = 0.332 in log<sub>2</sub> units). **(C)** Reproducibility of ribosome footprint density following starvation. Histogram of log<sub>2</sub> ratios between replicates for genes with at least 128 reads, along with the normal error curve (mean = -0.092, std dev = 0.326 in log<sub>2</sub> units).



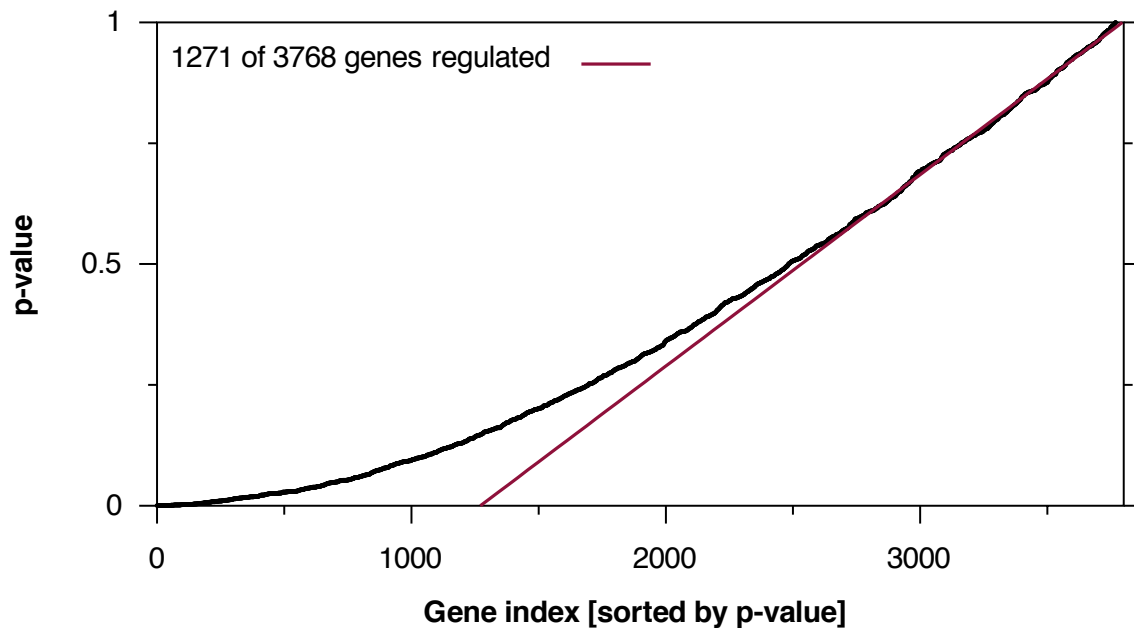

**Figure S21.** Estimation of the number of translationally regulated genes. The distribution of  $p$ -values is fit by a model in which roughly one-third of reliably measured genes (1271 of 3768) are translationally regulated. The no-change null hypothesis  $p$ -value for each gene was estimated from the distribution of inter-replicate ratios of translation in biological replicates of the log-phase and starvation samples. The unchanged genes should have a uniform distribution of  $p$  values, whereas the translationally regulated genes will have  $p$  values skewed strongly towards 0. Thus, most large  $p$  values will be derived from the unregulated subset, and the distribution of  $p$  values at the high- $p$  limit can be extrapolated down to  $p = 0$  to estimate the overall population of unregulated genes. The region of  $p \geq 0.67$  was used to fit  $p = 0.000396 \cdot \text{index} - 0.502$ , giving  $\text{index}(p = 0) = 1271.0$ .

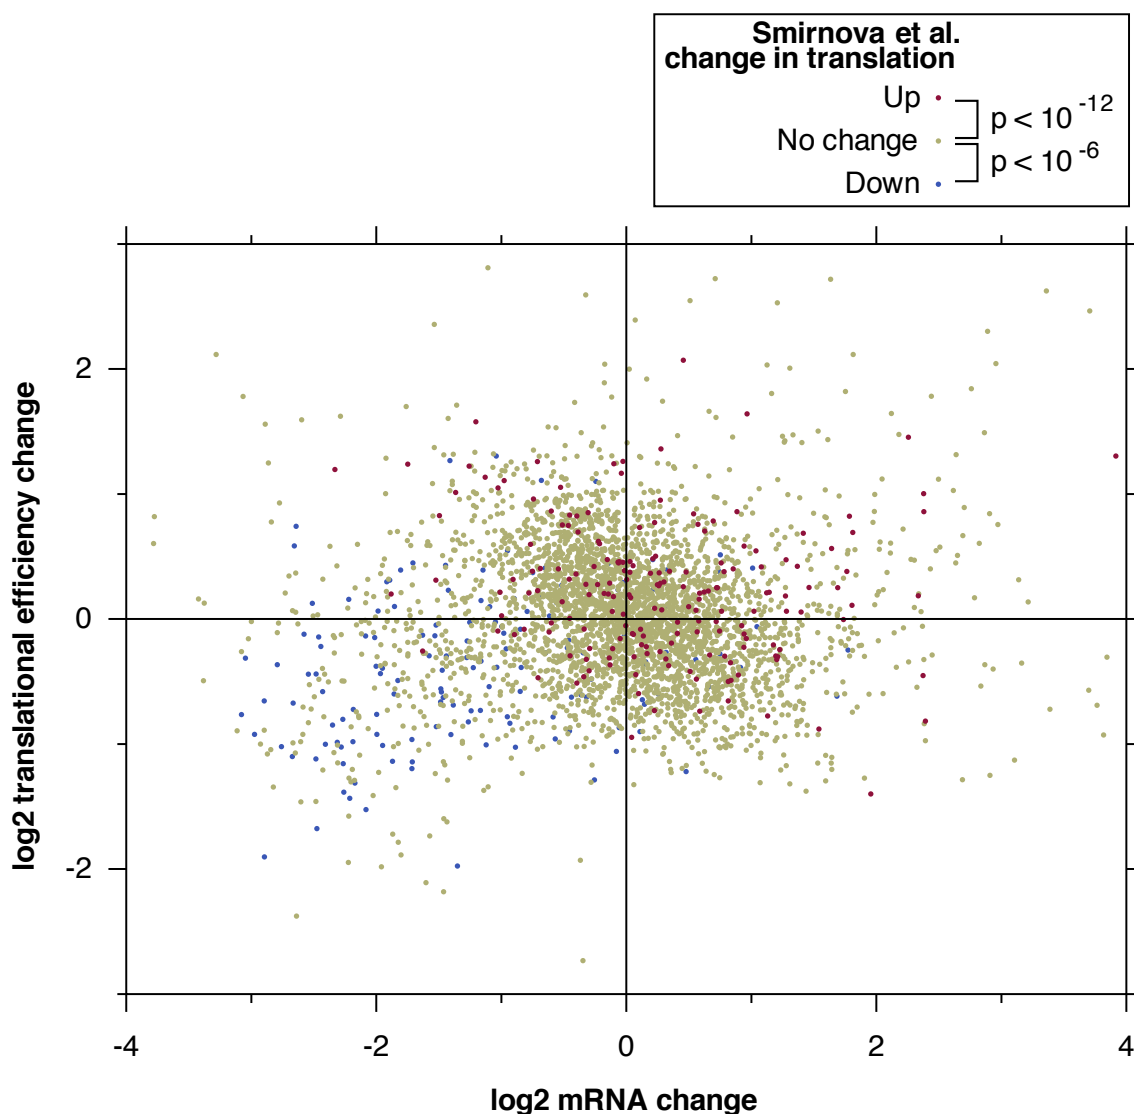

**Figure S22.** Comparison of ribosome footprinting results with polysome fraction measurements by Smirnova *et al.* following amino acid starvation. Genes were plotted as in Fig. 4A. Those genes whose messages showed a significant increase in polysome association in the Smirnova *et al.* data, indicating an increase in translation, were colored red. Similarly, genes whose messages showed decreased polysome association were colored blue. The change in translational efficiency, measured by ribosome profiling, was significantly higher for the genes with increased polysome association and lower for genes with decreased polysome association, relative to other genes, as shown;  $p$  values were calculated using a 1-sided Mann-Whitney U test .

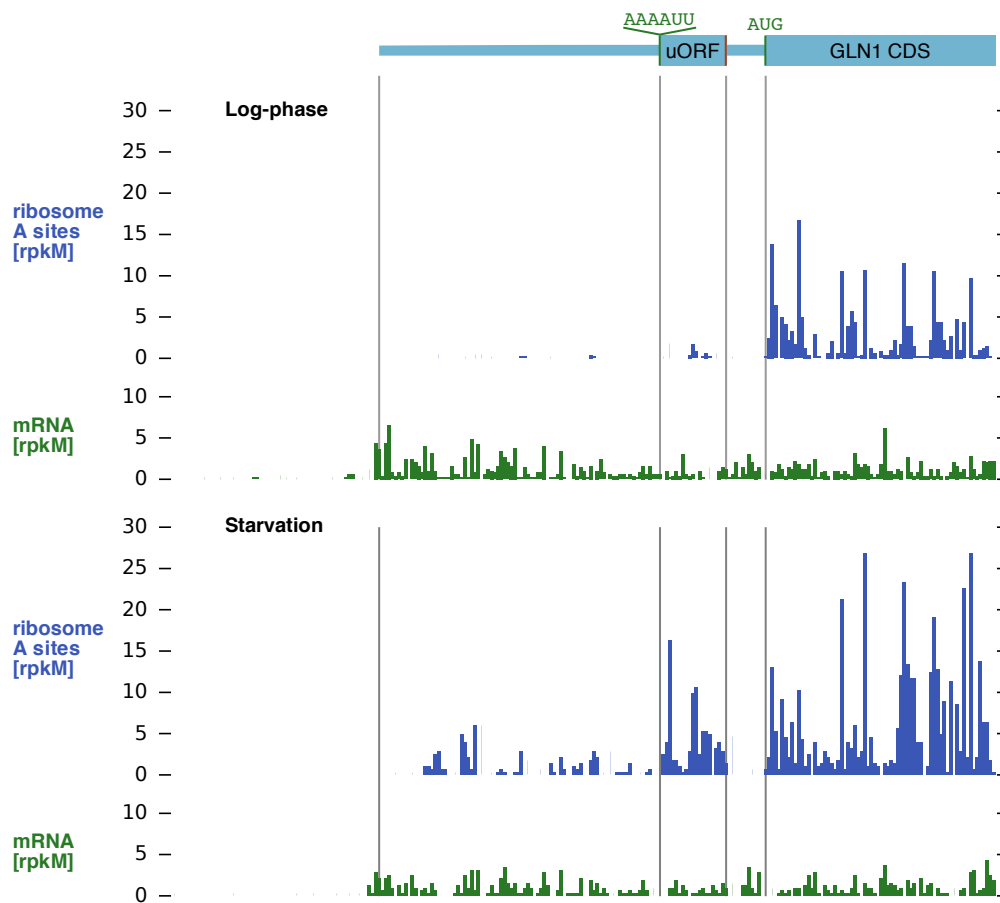

**Figure S23.** Translation in the *GLN1* 5' UTR induced by starvation. The translational efficiency of *GLN1* increases 3.3-fold in response to amino acid starvation. There is also a dramatic increase in ribosome density on the 5' UTR which is concentrated in the indicated non-AUG uORF, where some translation is detectable even in log-phase growth.

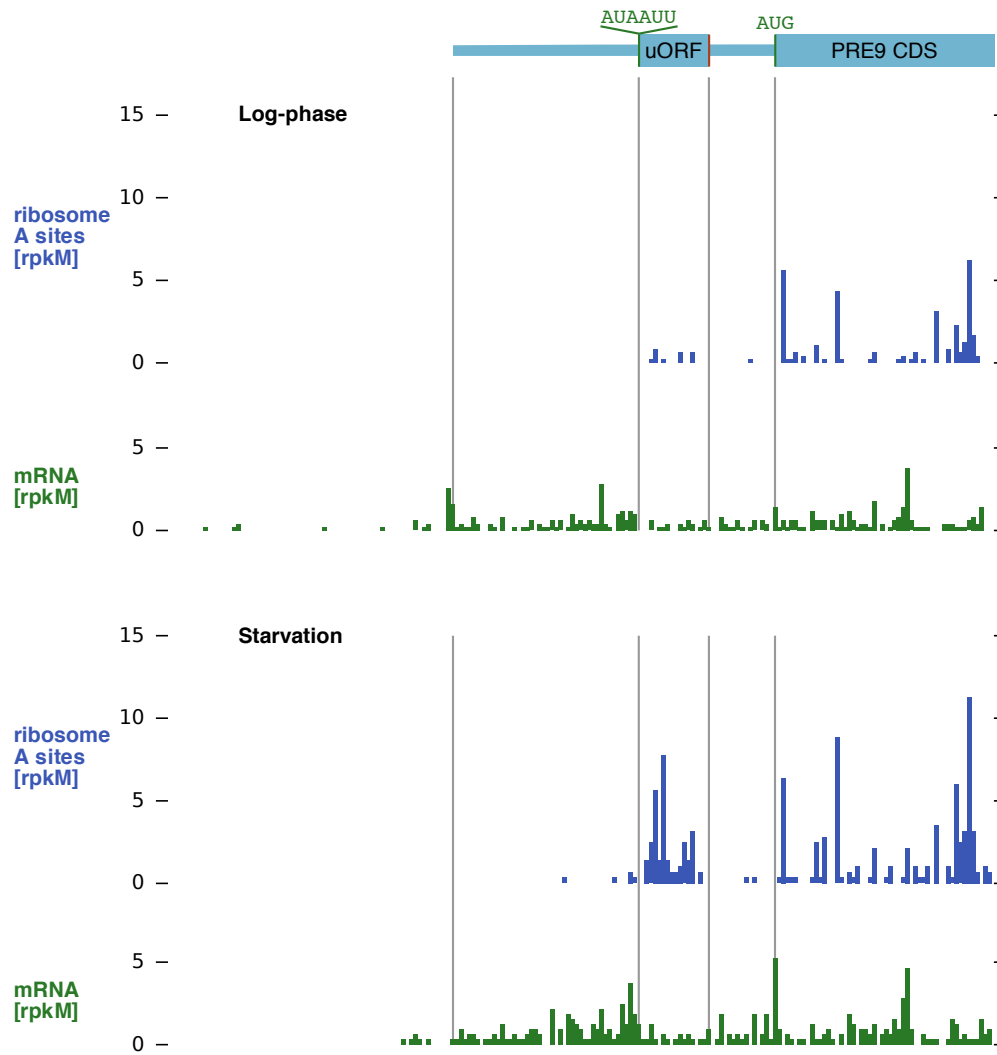

**Figure S24.** Translation in the *PRE9* 5' UTR induced by starvation. The mRNA abundance increases during starvation, but the translational efficiency is essentially unchanged. A non-AUG uORF which is weakly translated during log-phase growth is strongly induced upon starvation.

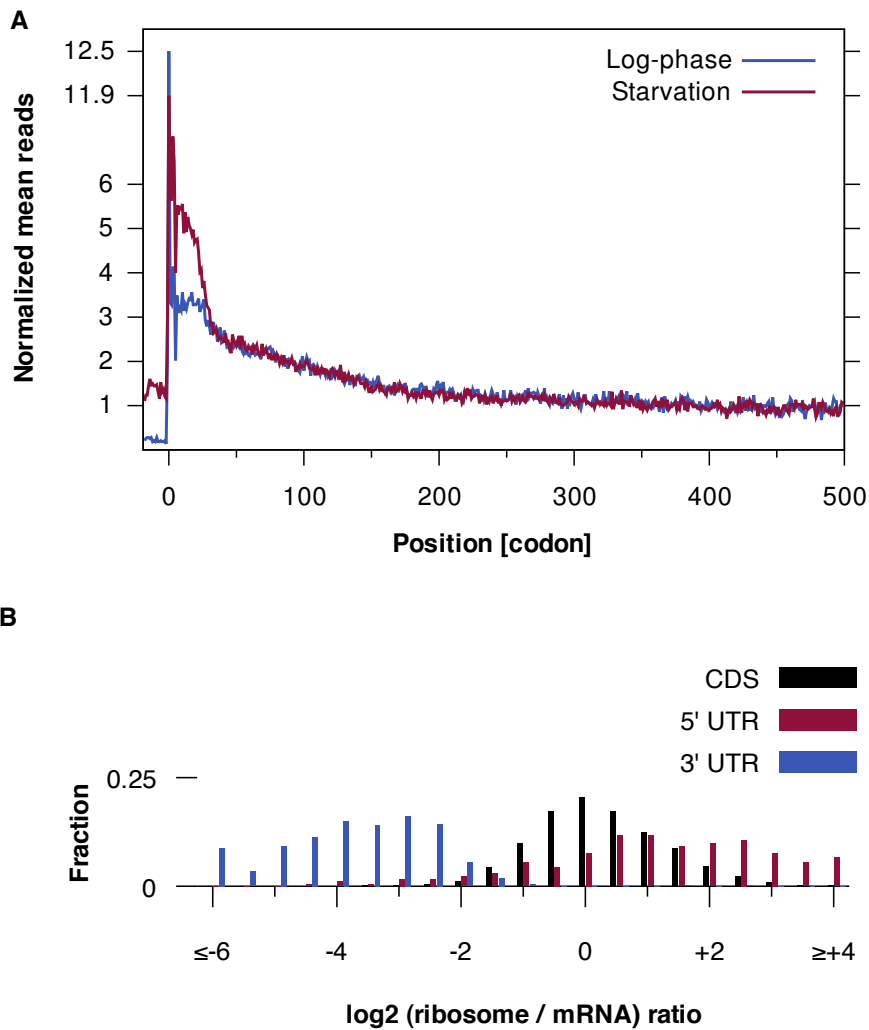

**Figure S25.** Global effects of starvation on translation. **(A)** Starvation further increases ribosome density on the first 30 codons. Ribosome density as a function of position was plotted during starvation versus log-phase growth, as in Fig. 2F. **(B)** Increased 5' UTR translation during starvation. As in Fig. 3B, for starvation samples.

| Alignment            | mrna rich1        |             | mrna noaa1       |             | mrna rich2        |             | mrna noaa2        |             |
|----------------------|-------------------|-------------|------------------|-------------|-------------------|-------------|-------------------|-------------|
| <b>Total</b>         | <b>4 700 324</b>  |             | <b>4 135 727</b> |             | <b>13 018 070</b> |             | <b>10 659 366</b> |             |
| Culled               | 239 822           | 5.1         | 314 000          | 7.6         | 133 668           | 1.0         | 51 956            | 0.5         |
| Unculled             | 4 460 502         | 94.9        | 3 821 727        | 92.4        | 12 884 402        | 99.0        | 10 607 410        | 99.5        |
| <b>Unculled</b>      | <b>4 460 502</b>  |             | <b>3 821 727</b> |             | <b>12 884 402</b> |             | <b>10 607 410</b> |             |
| rRNA                 | 1 925 728         | 43.2        | 2 172 947        | 56.9        | 4 978 873         | 38.6        | 5 387 823         | 50.8        |
| No rRNA              | 2 534 774         | 56.8        | 1 648 780        | 43.1        | 7 905 529         | 61.4        | 5 219 587         | 49.2        |
| <i>Genomic</i>       | <i>2 454 964</i>  | <i>55.0</i> | <i>1 572 289</i> | <i>41.1</i> | <i>5 721 013</i>  | <i>44.4</i> | <i>3 502 836</i>  | <i>33.0</i> |
| <b>No rRNA</b>       | <b>2 534 774</b>  |             | <b>1 648 780</b> |             | <b>7 905 529</b>  |             | <b>5 219 587</b>  |             |
| Genomic              | 2 454 964         | 96.9        | 1 572 289        | 95.4        | 5 721 013         | 72.4        | 3 502 836         | 67.1        |
| No genomic           | 79 810            | 3.1         | 76 491           | 4.6         | 2 184 516         | 27.6        | 1 716 751         | 32.9        |
| CDSes +100 bp        | 2 266 754         | 89.4        | 1 462 372        | 88.7        | 5 210 137         | 65.9        | 3 229 889         | 61.9        |
| <i>Splices</i>       | <i>7 259</i>      | <i>0.3</i>  | <i>3 188</i>     | <i>0.2</i>  | <i>23 631</i>     | <i>0.3</i>  | <i>7 758</i>      | <i>0.1</i>  |
| <b>Genomic</b>       | <b>2 454 964</b>  |             | <b>1 572 289</b> |             | <b>5 721 013</b>  |             | <b>3 502 836</b>  |             |
| <i>CDSes +100 bp</i> | <i>2 266 754</i>  | <i>92.3</i> | <i>1 462 372</i> | <i>93.0</i> | <i>5 210 137</i>  | <i>91.1</i> | <i>3 229 889</i>  | <i>92.2</i> |
| <i>Splices</i>       | <i>7 259</i>      | <i>0.3</i>  | <i>3 188</i>     | <i>0.2</i>  | <i>23 631</i>     | <i>0.4</i>  | <i>7 758</i>      | <i>0.2</i>  |
| Alignment            | fp rich1          |             | fp noaa1         |             | fp rich2          |             | fp noaa2          |             |
| <b>Total</b>         | <b>13 561 039</b> |             | <b>9 073 940</b> |             | <b>28 616 240</b> |             | <b>18 841 676</b> |             |
| Culled               | 467 489           | 3.4         | 467 281          | 5.1         | 256 924           | 0.9         | 70 898            | 0.4         |
| Unculled             | 13 093 550        | 96.6        | 8 606 659        | 94.9        | 28 359 178        | 99.1        | 18 770 778        | 99.6        |
| <b>Unculled</b>      | <b>13 093 550</b> |             | <b>8 606 659</b> |             | <b>28 359 178</b> |             | <b>18 770 778</b> |             |
| rRNA                 | 10 952 914        | 83.7        | 7 531 522        | 87.5        | 17 828 899        | 62.9        | 14 023 989        | 74.7        |
| No rRNA              | 2 140 636         | 16.3        | 1 075 137        | 12.5        | 10 530 279        | 37.1        | 4 746 789         | 25.3        |
| <i>Genomic</i>       | <i>2 000 107</i>  | <i>15.3</i> | <i>986 611</i>   | <i>11.5</i> | <i>5 138 796</i>  | <i>18.1</i> | <i>2 671 653</i>  | <i>14.2</i> |
| <b>No rRNA</b>       | <b>2 140 636</b>  |             | <b>1 075 137</b> |             | <b>10 530 279</b> |             | <b>4 746 789</b>  |             |
| Genomic              | 2 000 107         | 93.4        | 986 611          | 91.8        | 5 138 796         | 48.8        | 2 671 653         | 56.3        |
| No genomic           | 140 529           | 6.6         | 88 526           | 8.2         | 5 391 483         | 51.2        | 2 075 136         | 43.7        |
| CDSes +100 bp        | 1 926 044         | 90.0        | 930 091          | 86.5        | 5 031 093         | 47.8        | 2 568 616         | 54.1        |
| <i>Splices</i>       | <i>19 047</i>     | <i>0.9</i>  | <i>5 516</i>     | <i>0.5</i>  | <i>52 025</i>     | <i>0.5</i>  | <i>14 493</i>     | <i>0.3</i>  |
| <b>Genomic</b>       | <b>2 000 107</b>  |             | <b>986 611</b>   |             | <b>5 138 796</b>  |             | <b>2 671 653</b>  |             |
| <i>CDSes +100 bp</i> | <i>1 926 044</i>  | <i>96.3</i> | <i>930 091</i>   | <i>94.3</i> | <i>5 031 093</i>  | <i>97.9</i> | <i>2 568 616</i>  | <i>96.1</i> |
| <i>Splices</i>       | <i>19 047</i>     | <i>1.0</i>  | <i>5 516</i>     | <i>0.6</i>  | <i>52 025</i>     | <i>1.0</i>  | <i>14 493</i>     | <i>0.5</i>  |

**Table S1.** Alignment statistics for deep sequencing reads. The total number of sequencing reads at each stage of alignment is shown in bold, followed by the number of matching or non-matching reads at the next stage of the alignment, and the percentage of the total they represent. Informative comparisons that are not direct subsets of the total are shown in italics. Splice reads are reads with CDS alignments but no genome alignments.

**Table S2A: GO Terms Over-represented in Highly Translated Genes**

| GO Term                                               | GO ID      | log <sub>10</sub> <i>p</i> value | Expected | Actual | Total |
|-------------------------------------------------------|------------|----------------------------------|----------|--------|-------|
| organic acid metabolic process                        | GO:0006082 | -12.7                            | 36.5     | 81     | 257   |
| carboxylic acid metabolic process                     | GO:0019752 | -12.7                            | 36.5     | 81     | 257   |
| amino acid metabolic process                          | GO:0006520 | -11.6                            | 23.2     | 58     | 163   |
| amino acid and derivative metabolic process           | GO:0006519 | -11.5                            | 25.1     | 61     | 177   |
| biosynthetic process                                  | GO:0009058 | -9.9                             | 108.0    | 167    | 760   |
| cellular process                                      | GO:0009987 | -9.5                             | 506.0    | 566    | 3562  |
| amine metabolic process                               | GO:0009308 | -9.4                             | 27.8     | 61     | 196   |
| nitrogen compound metabolic process                   | GO:0006807 | -8.7                             | 30.3     | 63     | 213   |
| hexose catabolic process                              | GO:0019320 | -7.6                             | 3.3      | 15     | 23    |
| glucose catabolic process                             | GO:0006007 | -7.6                             | 3.3      | 15     | 23    |
| translation                                           | GO:0006412 | -7.3                             | 39.1     | 72     | 275   |
| amine biosynthetic process                            | GO:0009309 | -7.1                             | 14.1     | 35     | 99    |
| amino acid biosynthetic process                       | GO:0008652 | -7.0                             | 12.9     | 33     | 91    |
| nitrogen compound biosynthetic process                | GO:0044271 | -7.0                             | 14.2     | 35     | 100   |
| mRNA catabolic process, deadenylation-dependent decay | GO:0000288 | -6.9                             | 3.1      | 14     | 22    |
| monosaccharide catabolic process                      | GO:0046365 | -6.9                             | 4.0      | 16     | 28    |
| cellular biosynthetic process                         | GO:0044249 | -6.8                             | 42.3     | 75     | 298   |
| oxidative phosphorylation                             | GO:0006119 | -6.8                             | 5.4      | 19     | 38    |
| alcohol catabolic process                             | GO:0046164 | -6.3                             | 4.3      | 16     | 30    |
| acetyl-CoA metabolic process                          | GO:0006084 | -6.3                             | 2.6      | 12     | 18    |
| regulation of RNA stability                           | GO:0043487 | -6.3                             | 3.8      | 15     | 27    |
| regulation of mRNA stability                          | GO:0043488 | -6.3                             | 3.8      | 15     | 27    |
| catabolic process                                     | GO:0009056 | -6.0                             | 50.4     | 83     | 355   |
| cellular catabolic process                            | GO:0044248 | -6.0                             | 48.9     | 81     | 344   |
| cellular metabolic process                            | GO:0044237 | -5.9                             | 363.4    | 419    | 2558  |
| cellular carbohydrate catabolic process               | GO:0044275 | -5.8                             | 5.5      | 18     | 39    |
| carbohydrate catabolic process                        | GO:0016052 | -5.8                             | 5.5      | 18     | 39    |
| metabolic process                                     | GO:0008152 | -5.8                             | 377.2    | 432    | 2655  |
| coenzyme metabolic process                            | GO:0006732 | -5.6                             | 16.6     | 36     | 117   |
| regulation of RNA metabolic process                   | GO:0051252 | -5.5                             | 4.3      | 15     | 30    |
| branched chain family amino acid metabolic process    | GO:0009081 | -5.3                             | 2.1      | 10     | 15    |
| regulation of cell redox homeostasis                  | GO:0030503 | -5.3                             | 1.4      | 8      | 10    |
| cell redox homeostasis                                | GO:0045454 | -5.3                             | 1.4      | 8      | 10    |
| cofactor metabolic process                            | GO:0051186 | -5.2                             | 20.6     | 41     | 145   |
| age-dependent general metabolic decline               | GO:0007571 | -5.1                             | 0.9      | 6      | 6     |

*Continued on next page*

Table S2A: GO Terms Over-represented in Highly Translated Genes, continued

| GO Term                                                                    | GO ID      | log <sub>10</sub> <i>p</i> value | Expected | Actual | Total |
|----------------------------------------------------------------------------|------------|----------------------------------|----------|--------|-------|
| generation of precursor metabolites and energy                             | GO:0006091 | -5.1                             | 20.9     | 41     | 147   |
| pyruvate metabolic process                                                 | GO:0006090 | -5.1                             | 3.6      | 13     | 25    |
| glycolysis                                                                 | GO:0006096 | -5.0                             | 2.3      | 10     | 16    |
| glucose metabolic process                                                  | GO:0006006 | -4.8                             | 6.4      | 18     | 45    |
| acetyl-CoA catabolic process                                               | GO:0046356 | -4.6                             | 2.0      | 9      | 14    |
| tricarboxylic acid cycle                                                   | GO:0006099 | -4.6                             | 2.0      | 9      | 14    |
| primary metabolic process                                                  | GO:0044238 | -4.6                             | 348.6    | 397    | 2454  |
| cellular macromolecule catabolic process                                   | GO:0044265 | -4.6                             | 36.9     | 61     | 260   |
| macromolecule biosynthetic process                                         | GO:0009059 | -4.5                             | 63.2     | 93     | 445   |
| endocytosis                                                                | GO:0006897 | -4.4                             | 11.6     | 26     | 82    |
| branched chain family amino acid biosynthetic process                      | GO:0009082 | -4.3                             | 1.7      | 8      | 12    |
| ATP metabolic process                                                      | GO:0046034 | -4.3                             | 2.6      | 10     | 18    |
| purine nucleoside triphosphate metabolic process                           | GO:0009144 | -4.3                             | 2.6      | 10     | 18    |
| purine ribonucleoside triphosphate metabolic process                       | GO:0009205 | -4.3                             | 2.6      | 10     | 18    |
| membrane invagination                                                      | GO:0010324 | -4.3                             | 12.5     | 27     | 88    |
| monovalent inorganic cation transport                                      | GO:0015672 | -4.3                             | 3.6      | 12     | 25    |
| age-dependent general metabolic decline during chronological cell aging    | GO:0001323 | -4.2                             | 0.7      | 5      | 5     |
| age-dependent response to oxidative stress during chronological cell aging | GO:0001324 | -4.2                             | 0.7      | 5      | 5     |
| age-dependent response to oxidative stress                                 | GO:0001306 | -4.2                             | 0.7      | 5      | 5     |
| membrane organization and biogenesis                                       | GO:0016044 | -4.2                             | 24.9     | 44     | 175   |
| translational initiation                                                   | GO:0006413 | -4.1                             | 5.3      | 15     | 37    |
| coenzyme catabolic process                                                 | GO:0009109 | -4.1                             | 2.7      | 10     | 19    |
| cofactor catabolic process                                                 | GO:0051187 | -4.1                             | 2.7      | 10     | 19    |
| response to oxidative stress                                               | GO:0006979 | -4.0                             | 8.9      | 21     | 63    |
| oxidoreductase activity                                                    | GO:0016491 | -12.2                            | 30.0     | 70     | 211   |
| catalytic activity                                                         | GO:0003824 | -6.9                             | 237.9    | 298    | 1675  |
| hydrogen ion transmembrane transporter activity                            | GO:0015078 | -6.4                             | 6.7      | 21     | 47    |
| monovalent inorganic cation transmembrane transporter activity             | GO:0015077 | -6.0                             | 7.0      | 21     | 49    |
| translation factor activity, nucleic acid binding                          | GO:0008135 | -5.0                             | 5.1      | 16     | 36    |
| translation regulator activity                                             | GO:0045182 | -4.8                             | 6.4      | 18     | 45    |
| metalloexopeptidase activity                                               | GO:0008235 | -4.3                             | 1.0      | 6      | 7     |
| cytoplasm                                                                  | GO:0005737 | -15.9                            | 419.4    | 511    | 2952  |
| cytosol                                                                    | GO:0005829 | -14.1                            | 32.8     | 78     | 231   |
| chitin- and beta-glucan-containing cell wall                               | GO:0009277 | -12.1                            | 8.1      | 31     | 57    |
| external encapsulating structure                                           | GO:0030312 | -12.1                            | 8.1      | 31     | 57    |
| cell wall                                                                  | GO:0005618 | -12.1                            | 8.1      | 31     | 57    |

Continued on next page



Table S2A: GO Terms Over-represented in Highly Translated Genes, continued

| GO Term                                                                     | GO ID      | $\log_{10} p$ value | Expected | Actual | Total |
|-----------------------------------------------------------------------------|------------|---------------------|----------|--------|-------|
| cell part                                                                   | GO:0044464 | -10.8               | 610.0    | 647    | 4294  |
| cell                                                                        | GO:0005623 | -10.8               | 610.1    | 647    | 4295  |
| cytoplasmic part                                                            | GO:0044444 | -10.6               | 294.5    | 373    | 2073  |
| nucleoid                                                                    | GO:0009295 | -9.8                | 3.3      | 17     | 23    |
| mitochondrial nucleoid                                                      | GO:0042645 | -9.8                | 3.3      | 17     | 23    |
| cytosolic ribosome (sensu Eukaryota)                                        | GO:0005830 | -8.6                | 11.9     | 34     | 84    |
| cytosolic part                                                              | GO:0044445 | -8.5                | 14.3     | 38     | 101   |
| mitochondrial membrane part                                                 | GO:0044455 | -6.3                | 13.1     | 32     | 92    |
| mitochondrion                                                               | GO:0005739 | -5.9                | 131.3    | 178    | 924   |
| cytosolic large ribosomal subunit (sensu Eukaryota)                         | GO:0005842 | -5.1                | 5.5      | 17     | 39    |
| proton-transporting two-sector ATPase complex, catalytic domain             | GO:0033178 | -5.0                | 1.8      | 9      | 13    |
| ribosome                                                                    | GO:0005840 | -4.9                | 34.5     | 59     | 243   |
| cell cortex part                                                            | GO:0044448 | -4.9                | 12.4     | 28     | 87    |
| mitochondrial part                                                          | GO:0044429 | -4.8                | 59.0     | 89     | 415   |
| cell cortex                                                                 | GO:0005938 | -4.5                | 13.5     | 29     | 95    |
| actin cytoskeleton                                                          | GO:0015629 | -4.5                | 10.9     | 25     | 77    |
| intracellular part                                                          | GO:0044424 | -4.4                | 569.7    | 601    | 4010  |
| cortical cytoskeleton                                                       | GO:0030863 | -4.3                | 7.4      | 19     | 52    |
| cortical actin cytoskeleton                                                 | GO:0030864 | -4.3                | 7.4      | 19     | 52    |
| mitochondrial proton-transporting ATP synthase complex, catalytic core F(1) | GO:0000275 | -4.2                | 0.7      | 5      | 5     |
| proton-transporting ATP synthase complex, catalytic core F(1)               | GO:0045261 | -4.2                | 0.7      | 5      | 5     |
| mitochondrial respiratory chain                                             | GO:0005746 | -4.2                | 3.1      | 11     | 22    |
| actin cortical patch                                                        | GO:0030479 | -4.1                | 5.8      | 16     | 41    |

**Table S2B: GO Terms Under-represented in Highly Translated Genes**

| <b>GO Term</b> | <b>GO ID</b> | <b><math>\log_{10} p</math> value</b> | <b>Expected</b> | <b>Actual</b> | <b>Total</b> |
|----------------|--------------|---------------------------------------|-----------------|---------------|--------------|
| nucleus        | GO:0005634   | -6.7                                  | 234.3           | 177           | 1649         |
| nuclear part   | GO:0044428   | -6.0                                  | 124.0           | 81            | 873          |

**Table S2C: GO Terms Under-represented in Poorly Translated Genes**

| GO Term                                           | GO ID      | log <sub>10</sub> p value | Expected | Actual | Total |
|---------------------------------------------------|------------|---------------------------|----------|--------|-------|
| cellular process                                  | GO:0009987 | -13.0                     | 510.6    | 433    | 3562  |
| ribonucleoprotein complex biogenesis and assembly | GO:0022613 | -8.0                      | 51.7     | 19     | 361   |
| cellular metabolic process                        | GO:0044237 | -7.9                      | 366.7    | 300    | 2558  |
| ribosome biogenesis and assembly                  | GO:0042254 | -7.7                      | 43.1     | 14     | 301   |
| metabolic process                                 | GO:0008152 | -7.3                      | 380.6    | 317    | 2655  |
| primary metabolic process                         | GO:0044238 | -6.9                      | 351.8    | 290    | 2454  |
| cellular component organization and biogenesis    | GO:0016043 | -6.7                      | 278.5    | 219    | 1943  |
| vesicle-mediated transport                        | GO:0016192 | -5.6                      | 45.6     | 20     | 318   |
| biosynthetic process                              | GO:0009058 | -5.1                      | 108.9    | 72     | 760   |
| translation                                       | GO:0006412 | -4.6                      | 39.4     | 18     | 275   |
| secretion by cell                                 | GO:0032940 | -4.3                      | 34.4     | 15     | 240   |
| secretion                                         | GO:0046903 | -4.3                      | 34.4     | 15     | 240   |
| macromolecule metabolic process                   | GO:0043170 | -4.3                      | 300.3    | 254    | 2095  |
| nuclear transport                                 | GO:0051169 | -4.2                      | 17.2     | 4      | 120   |
| nucleocytoplasmic transport                       | GO:0006913 | -4.2                      | 17.2     | 4      | 120   |
| secretory pathway                                 | GO:0045045 | -4.1                      | 33.5     | 15     | 234   |
| structural molecule activity                      | GO:0005198 | -6.9                      | 34.7     | 10     | 242   |
| structural constituent of ribosome                | GO:0003735 | -6.8                      | 19.5     | 2      | 136   |
| cell part                                         | GO:0044464 | -29.0                     | 615.5    | 534    | 4294  |
| cell                                              | GO:0005623 | -28.6                     | 615.7    | 535    | 4295  |
| intracellular                                     | GO:0005622 | -22.4                     | 579.4    | 493    | 4042  |
| intracellular part                                | GO:0044424 | -20.5                     | 574.8    | 491    | 4010  |
| cytoplasm                                         | GO:0005737 | -11.4                     | 423.2    | 343    | 2952  |
| macromolecular complex                            | GO:0032991 | -9.5                      | 204.7    | 138    | 1428  |
| organelle lumen                                   | GO:0043233 | -8.5                      | 103.8    | 56     | 724   |
| membrane-enclosed lumen                           | GO:0031974 | -8.5                      | 103.8    | 56     | 724   |
| ribosomal subunit                                 | GO:0033279 | -7.4                      | 20.9     | 2      | 146   |
| cytosolic part                                    | GO:0044445 | -6.9                      | 14.5     | 0      | 101   |
| organelle                                         | GO:0043226 | -6.7                      | 479.2    | 423    | 3343  |
| intracellular organelle                           | GO:0043229 | -6.7                      | 479.1    | 423    | 3342  |
| ribosome                                          | GO:0005840 | -6.4                      | 34.8     | 11     | 243   |
| protein complex                                   | GO:0043234 | -6.1                      | 159.0    | 111    | 1109  |
| cytosolic ribosome (sensu Eukaryota)              | GO:0005830 | -5.7                      | 12.0     | 0      | 84    |
| ribonucleoprotein complex                         | GO:0030529 | -5.1                      | 60.2     | 32     | 420   |
| organelle part                                    | GO:0044422 | -4.7                      | 272.4    | 224    | 1900  |

*Continued on next page*

Table S2C: GO Terms Under-represented in Poorly Translated Genes, continued

| GO Term                                | GO ID      | $\log_{10} p$ value | Expected | Actual | Total |
|----------------------------------------|------------|---------------------|----------|--------|-------|
| intracellular organelle part           | GO:0044446 | -4.7                | 272.4    | 224    | 1900  |
| large ribosomal subunit                | GO:0015934 | -4.4                | 11.9     | 1      | 83    |
| nuclear lumen                          | GO:0031981 | -4.3                | 74.3     | 46     | 518   |
| membrane-bound organelle               | GO:0043227 | -4.3                | 445.5    | 401    | 3108  |
| intracellular membrane-bound organelle | GO:0043231 | -4.3                | 445.5    | 401    | 3108  |

**Table S2.** GO term analysis of translational efficiency. Gene ontology (GO) term analysis (*S14*) was performed with the GOstats package (*S15*). The 660 genes with translational efficiency at least 1 standard deviation above the median (A,B) and the 666 genes with translational efficiency with translational efficiency at least 1 standard deviation below the median (C) were compared to all 4648 genes with reliable translation measurements. All GO terms over-represented (A) or under-represented (B,C) with  $\log_{10} p < -4$  are displayed, sorted by significance within each category. There were no significantly over-represented GO terms amongst the poorly translated genes.

**Table S3: All uORFs**

| uORF                 | CDS       | Gene  | Initiator Site | Length | uORF end to CDS | # Rib | # mRNA | 5' UTR # Rib | 5' UTR mRNA | CDS mRNA | CDS Rib |
|----------------------|-----------|-------|----------------|--------|-----------------|-------|--------|--------------|-------------|----------|---------|
| chrI@129038to128994  | YAL014C   | SYN8  | aaatagATGcgt   | 45     | -25             | 5     | 3      | 8            | 64.4        | 47.3     | 20.4    |
| chrI@67835to67824    | YAL040C   | CLN3  | agtcaaATGgat   | 12     | 304             | 0     | 0      | 3            | 13.9        | 16.5     | 6.4     |
| chrI@62752to62763    | YAL041W   | CDC24 | gtggctATGgta   | 12     | 77              | 0     | 0      | 0            | 19.5        | 46.5     | 19.2    |
| chrI@33225to33248    | YAL061W   | BDH2  | cggcagATGcga   | 24     | 200             | 0     | 1      | 8            | 8.5         | 15.6     | 6.4     |
| chrI@33252to33275    | YAL061W   | BDH2  | tagttaATGctt   | 24     | 173             | 0     | 0      | 8            | 8.5         | 15.6     | 6.4     |
| chrI@33266to33352    | YAL061W   | BDH2  | gataaaATGtat   | 87     | 96              | 0     | 0      | 8            | 8.5         | 15.6     | 6.4     |
| chrI@33287to33352    | YAL061W   | BDH2  | gtcgtatATGtgc  | 66     | 96              | 0     | 0      | 8            | 8.5         | 15.6     | 6.4     |
| chrI@158892to158978  | YAR008W   | SEN34 | tcgtatATGgct   | 87     | -12             | 9     | 14     | 10           | 57.5        | 98.9     | 9.9     |
| chrI@179999to179940  | YAR023C   |       | ttaaacATGcaa   | 60     | 123             | 5     | 6      | 7            | 31.9        | 29.9     | 1.5     |
| chrI@179972to179940  | YAR023C   |       | acactcATGtca   | 33     | 123             | 1     | 3      | 7            | 31.9        | 29.9     | 1.5     |
| chrI@179876to179817  | YAR023C   |       | cagaggATGagt   | 60     | 0               | 0     | 13     | 7            | 31.9        | 29.9     | 1.5     |
| chrII@207174to207191 | YBL009W   | ALK2  | acatacATGcgc   | 18     | 5               | 15    | 2      | 8            | 11.1        | 16.8     | 21.5    |
| chrII@192273to192299 | YBL016W   | FUS3  | tttttagATGatg  | 27     | 154             | 0     | 0      | 1            | 32.4        | 74.9     | 31.4    |
| chrII@192276to192299 | YBL016W   | FUS3  | tagatgATGcgg   | 24     | 154             | 0     | 0      | 1            | 32.4        | 74.9     | 31.4    |
| chrII@186489to186457 | YBL018C   | POP8  | tgataaATGgcc   | 33     | -19             | 1     | 2      | 1            | 128.7       | 207.0    | 63.2    |
| chrII@182258to182302 | YBL020W   | RFT1  | cgtaatATGgta   | 45     | 101             | 0     | 2      | 4            | 32.4        | 74.5     | 14.9    |
| chrII@182322to182360 | YBL020W   | RFT1  | aagacaATGcgt   | 39     | 43              | 4     | 4      | 4            | 32.4        | 74.5     | 14.9    |
| chrII@171359to171367 | YBL025W   | RRN10 | aagcgaATGtca   | 9      | 116             | 0     | 0      | 3            | 47.8        | 133.4    | 29.5    |
| chrII@171364to171390 | YBL025W   | RRN10 | aatgacATGaaa   | 27     | 93              | 0     | 0      | 3            | 47.8        | 133.4    | 29.5    |
| chrII@171369to171398 | YBL025W   | RRN10 | catgaaATGcag   | 30     | 85              | 0     | 0      | 3            | 47.8        | 133.4    | 29.5    |
| chrII@171399to171464 | YBL025W   | RRN10 | aagtaaATGttt   | 66     | 19              | 2     | 14     | 3            | 47.8        | 133.4    | 29.5    |
| chrII@164851to164822 | YBL029C-A |       | gaataaATGtca   | 30     | 48              | 16    | 10     | 17           | 55.8        | 89.3     | 35.9    |
| chrII@153758to153744 | YBL035C   | POL12 | aataatATGgac   | 15     | 132             | 0     | 0      | 1            | 19.9        | 15.6     | 21.8    |
| chrII@143191to143238 | YBL039W-B |       | agagcgATGaa    | 48     | 157             | 12    | 7      | 15           | 71.7        | 80.3     | 18.1    |
| chrII@136557to136610 | YBL043W   | ECM13 | ccctgtATGacc   | 54     | 80              | 0     | 3      | 0            | 11.9        | 4.1      | 0.8     |
| chrII@92363to93394   | YBL068W   | PRS4  | tacataATGcac   | 1032   | -983            | 2     | 14     | 5            | 94.9        | 154.4    | 85.9    |
| chrII@86577to86473   | YBL075C   | SSA3  | taagggATGtat   | 105    | 28              | 0     | 21     | 0            | 41.1        | 37.0     | 5.3     |
| chrII@86549to86529   | YBL075C   | SSA3  | aaacgaATGgaa   | 21     | 84              | 0     | 1      | 0            | 41.1        | 37.0     | 5.3     |
| chrII@86500to86468   | YBL075C   | SSA3  | tcttgtATGtca   | 33     | 23              | 0     | 11     | 0            | 41.1        | 37.0     | 5.3     |
| chrII@86494to86468   | YBL075C   | SSA3  | atgtcaATGttt   | 27     | 23              | 0     | 8      | 0            | 41.1        | 37.0     | 5.3     |
| chrII@254274to254251 | YBR008C   | FLR1  | atccttATGccg   | 24     | 42              | 0     | 2      | 0            | 18.7        | 23.6     | 0.1     |
| chrII@254257to254240 | YBR008C   | FLR1  | gtcattATGgtg   | 18     | 31              | 0     | 1      | 0            | 18.7        | 23.6     | 0.1     |
| chrII@324008to323898 | YBR043C   | QDR3  | aggcatATGtat   | 111    | -46             | 11    | 26     | 12           | 62.3        | 70.2     | 2.2     |
| chrII@323975to323898 | YBR043C   | QDR3  | acgtctATGtca   | 78     | -46             | 5     | 6      | 12           | 62.3        | 70.2     | 2.2     |
| chrII@326071to326063 | YBR044C   | TCM62 | tctcttATGctt   | 9      | 6               | 8     | 4      | 9            | 57.8        | 63.2     | 8.9     |
| chrII@340779to340771 | YBR053C   |       | gtttatATGcat   | 9      | 23              | 0     | 0      | 0            | 27.8        | 79.8     | 42.0    |
| chrII@392368to392360 | YBR077C   | SLM4  | actctaATGaat   | 9      | 74              | 0     | 0      | 2            | 64.2        | 162.3    | 94.1    |
| chrII@409034to409060 | YBR083W   | TEC1  | ttacatATGaca   | 27     | 102             | 0     | 3      | 2            | 24.5        | 16.2     | 31.1    |
| chrII@409061to409159 | YBR083W   | TEC1  | ttataaATGttt   | 99     | 3               | 2     | 12     | 2            | 24.5        | 16.2     | 31.1    |
| chrII@409067to409159 | YBR083W   | TEC1  | atgtttATGaaa   | 93     | 3               | 0     | 10     | 2            | 24.5        | 16.2     | 31.1    |
| chrII@423096to423061 | YBR086C   | IST2  | cgatttATGgct   | 36     | 27              | 28    | 7      | 36           | 23.4        | 46.0     | 57.3    |
| chrII@451993to451952 | YBR105C   | VID24 | ttgtgcATGaca   | 42     | -10             | 0     | 2      | 0            | 53.4        | 17.3     | 8.5     |
| chrII@454629to454612 | YBR107C   | IML3  | aaaaaaATGccg   | 18     | 89              | 0     | 0      | 1            | 8.0         | 24.1     | 3.3     |
| chrII@454615to454607 | YBR107C   | IML3  | accgatATGaaa   | 9      | 84              | 0     | 0      | 1            | 8.0         | 24.1     | 3.3     |
| chrII@454589to454560 | YBR107C   | IML3  | agtggaATGatc   | 30     | 37              | 1     | 2      | 1            | 8.0         | 24.1     | 3.3     |

*Continued on next page*

Table S3: All uORFs, continued

| uORF                  | CDS       | Gene   | Initiator Site | Length | uORF end<br>to CDS | # Rib | # mRNA | 5' UTR<br># Rib | 5' UTR<br>mRNA | CDS<br>mRNA | CDS<br>Rib |
|-----------------------|-----------|--------|----------------|--------|--------------------|-------|--------|-----------------|----------------|-------------|------------|
| chrII@454572to454396  | YBR107C   | IML3   | gactgcATGggt   | 177    | -127               | 1     | 4      | 1               | 8.0            | 24.1        | 3.3        |
| chrII@454528to454499  | YBR107C   | IML3   | ctttggATGgaa   | 30     | -24                | 0     | 0      | 1               | 8.0            | 24.1        | 3.3        |
| chrII@479279to479323  | YBR119W   | MUD1   | aaaaaaATGgaa   | 45     | 8                  | 1     | 5      | 1               | 17.9           | 40.3        | 17.6       |
| chrII@494113to494072  | YBR128C   | ATG14  | cctagtATGaca   | 42     | -36                | 0     | 0      | 2               | 22.9           | 19.3        | 1.6        |
| chrII@554434to554267  | YBR157C   | ICS2   | aaataaATGaga   | 168    | -36                | 6     | 48     | 6               | 69.2           | 128.7       | 30.8       |
| chrII@554393to554388  | YBR157C   | ICS2   | acaatATGtga    | 6      | 85                 | 1     | 0      | 6               | 69.2           | 128.7       | 30.8       |
| chrII@556326to556334  | YBR158W   | AMN1   | aactatATGtgt   | 9      | 208                | 13    | 14     | 41              | 441.6          | 247.2       | 41.1       |
| chrII@565172to565183  | YBR162W-A | YSY6   | cattacATGcag   | 12     | 42                 | 1     | 5      | 2               | 223.6          | 694.9       | 570.1      |
| chrII@595918to595929  | YBR183W   | YPC1   | ttatatATGtct   | 12     | 180                | 0     | 2      | 3               | 128.2          | 50.0        | 6.5        |
| chrII@599958to599950  | YBR185C   | MBA1   | aagcttATGaga   | 9      | -3                 | 0     | 0      | 0               | 66.8           | 54.4        | 25.6       |
| chrII@602514to602531  | YBR187W   | GDT1   | acgtttATGaaa   | 18     | 97                 | 24    | 29     | 10              | 327.0          | 420.0       | 144.9      |
| chrII@614474to614430  | YBR196C-A |        | tcggacATGcta   | 45     | 263                | 0     | 3      | 0               | 11.7           | 14.5        | 0.0        |
| chrII@614386to614312  | YBR196C-A |        | tgaactATGttg   | 75     | 145                | 0     | 3      | 0               | 11.7           | 14.5        | 0.0        |
| chrII@614321to614292  | YBR196C-A |        | aaaaatATGtca   | 30     | 125                | 0     | 3      | 0               | 11.7           | 14.5        | 0.0        |
| chrII@614315to614292  | YBR196C-A |        | atgtcaATGagg   | 24     | 125                | 0     | 3      | 0               | 11.7           | 14.5        | 0.0        |
| chrII@614298to614209  | YBR196C-A |        | accgggATGgta   | 90     | 42                 | 0     | 1      | 0               | 11.7           | 14.5        | 0.0        |
| chrII@620815to620838  | YBR200W   | BEM1   | atatggATGcac   | 24     | 28                 | 6     | 3      | 1               | 21.7           | 47.4        | 24.4       |
| chrII@642514to642452  | YBR208C   | DUR1,2 | acgcagATGttt   | 63     | 248                | 9     | 48     | 14              | 98.3           | 13.7        | 6.2        |
| chrII@642451to642431  | YBR208C   | DUR1,2 | aattgaATGttt   | 21     | 227                | 0     | 8      | 14              | 98.3           | 13.7        | 6.2        |
| chrII@642425to642390  | YBR208C   | DUR1,2 | gagcagATGagg   | 36     | 186                | 0     | 17     | 14              | 98.3           | 13.7        | 6.2        |
| chrII@653262to653306  | YBR215W   | HPC2   | cacacaATGcag   | 45     | 44                 | 0     | 1      | 0               | 10.1           | 24.8        | 22.9       |
| chrII@653274to653306  | YBR215W   | HPC2   | aaactATGcgg    | 33     | 44                 | 0     | 1      | 0               | 10.1           | 24.8        | 22.9       |
| chrII@657818to657829  | YBR217W   | ATG12  | gaaccaATGaca   | 12     | -3                 | 0     | 2      | 0               | 84.3           | 97.1        | 5.5        |
| chrII@668444to668436  | YBR222C   | PCS60  | atagagATGgta   | 9      | 91                 | 0     | 0      | 0               | 14.4           | 42.0        | 64.4       |
| chrII@668439to668419  | YBR222C   | PCS60  | gatggtATGatt   | 21     | 74                 | 0     | 1      | 0               | 14.4           | 42.0        | 64.4       |
| chrII@668415to668371  | YBR222C   | PCS60  | taatagATGctc   | 45     | 26                 | 0     | 2      | 0               | 14.4           | 42.0        | 64.4       |
| chrII@699950to699921  | YBR239C   |        | acattgATGaat   | 30     | -16                | 0     | 2      | 1               | 14.2           | 8.1         | 4.1        |
| chrII@704558to704596  | YBR242W   |        | cactgaATGggt   | 39     | 68                 | 6     | 12     | 15              | 72.6           | 93.0        | 50.5       |
| chrII@723227to723286  | YBR253W   | SRB6   | attgtgATGata   | 60     | -22                | 8     | 35     | 8               | 239.0          | 152.4       | 47.1       |
| chrII@749569to749676  | YBR274W   | CHK1   | ctgtatATGggc   | 108    | -88                | 1     | 1      | 1               | 20.7           | 55.4        | 7.5        |
| chrII@784700to784674  | YBR291C   | CTP1   | agaacaATGaaa   | 27     | 107                | 0     | 0      | 5               | 28.8           | 80.4        | 17.1       |
| chrII@784658to784641  | YBR291C   | CTP1   | cgtaaaATGtcg   | 18     | 74                 | 0     | 0      | 5               | 28.8           | 80.4        | 17.1       |
| chrII@784624to784613  | YBR291C   | CTP1   | attttgATGtca   | 12     | 46                 | 0     | 2      | 5               | 28.8           | 80.4        | 17.1       |
| chrII@784616to784590  | YBR291C   | CTP1   | gtcacaATGaaa   | 27     | 23                 | 1     | 7      | 5               | 28.8           | 80.4        | 17.1       |
| chrII@792794to792817  | YBR295W   | PCA1   | ttcgagATGctt   | 24     | 25                 | 5     | 1      | 7               | 4.0            | 7.5         | 1.3        |
| chrII@792814to792906  | YBR295W   | PCA1   | tatacaATGaaa   | 93     | -64                | 3     | 0      | 7               | 4.0            | 7.5         | 1.3        |
| chrIII@103401to103342 | YCL011C   | GBP2   | taagctATGggc   | 60     | -15                | 1     | 51     | 1               | 527.4          | 365.0       | 119.6      |
| chrIII@83424to83486   | YCL021W-A |        | ccctccATGctc   | 63     | 133                | 0     | 13     | 0               | 33.6           | 38.5        | 0.0        |
| chrIII@83448to83486   | YCL021W-A |        | aaccttATGtgg   | 39     | 133                | 0     | 9      | 0               | 33.6           | 38.5        | 0.0        |
| chrIII@83463to83486   | YCL021W-A |        | tcgattATGcga   | 24     | 133                | 0     | 4      | 0               | 33.6           | 38.5        | 0.0        |
| chrIII@83532to83546   | YCL021W-A |        | agttaaATGgaa   | 15     | 73                 | 0     | 1      | 0               | 33.6           | 38.5        | 0.0        |
| chrIII@78006to77938   | YCL025C   | AGP1   | tccttgATGgtc   | 69     | 20                 | 0     | 8      | 2               | 27.6           | 36.3        | 12.7       |
| chrIII@77989to77984   | YCL025C   | AGP1   | acaacaATGtag   | 6      | 66                 | 0     | 1      | 2               | 27.6           | 36.3        | 12.7       |
| chrIII@77971to77966   | YCL025C   | AGP1   | tttattATGtaa   | 6      | 48                 | 0     | 1      | 2               | 27.6           | 36.3        | 12.7       |
| chrIII@126903to126874 | YCR007C   |        | ggggctATGctt   | 30     | 147                | 0     | 1      | 0               | 11.2           | 27.2        | 6.9        |
| chrIII@126837to126802 | YCR007C   |        | gagtttATGaac   | 36     | 75                 | 0     | 1      | 0               | 11.2           | 27.2        | 6.9        |

Continued on next page

Table S3: All uORFs, continued

| uORF                  | CDS       | Gene  | Initiator Site | Length | uORF end<br>to CDS | # Rib | # mRNA | 5' UTR<br># Rib | 5' UTR<br>mRNA | CDS<br>mRNA | CDS<br>Rib |
|-----------------------|-----------|-------|----------------|--------|--------------------|-------|--------|-----------------|----------------|-------------|------------|
| chrIII@126807to126802 | YCR007C   |       | ctgaaaATGtaa   | 6      | 75                 | 0     | 1      | 0               | 11.2           | 27.2        | 6.9        |
| chrIII@155266to155295 | YCR020W-B | HTL1  | aattttATGata   | 30     | 22                 | 4     | 13     | 3               | 117.6          | 326.8       | 162.2      |
| chrIII@160424to160374 | YCR023C   |       | aaaggaATGcta   | 51     | 6                  | 17    | 10     | 17              | 40.1           | 47.6        | 9.8        |
| chrIII@160391to160374 | YCR023C   |       | aagcatATGaac   | 18     | 6                  | 5     | 2      | 17              | 40.1           | 47.6        | 9.8        |
| chrIII@179390to179395 | YCR032W   | BPH1  | tcgttgATGtga   | 6      | 120                | 0     | 0      | 0               | 22.8           | 12.7        | 2.7        |
| chrIII@186240to186245 | YCR033W   | SNT1  | tgaattATGtaa   | 6      | 239                | 0     | 0      | 5               | 13.7           | 24.7        | 14.5       |
| chrIII@223318to223304 | YCR057C   | PWP2  | ctaggtATGtac   | 15     | 81                 | 0     | 1      | 2               | 45.1           | 73.3        | 36.9       |
| chrIII@238849to238920 | YCR069W   | CPR4  | taaataATGtat   | 72     | 130                | 0     | 2      | 11              | 25.8           | 38.4        | 60.4       |
| chrIII@267135to267146 | YCR089W   | FIG2  | accataATGctg   | 12     | 284                | 1     | 0      | 7               | 7.1            | 4.1         | 1.3        |
| chrIII@267175to267234 | YCR089W   | FIG2  | aagtgtATGgta   | 60     | 196                | 1     | 2      | 7               | 7.1            | 4.1         | 1.3        |
| chrIII@267182to267223 | YCR089W   | FIG2  | tggtacATGgtg   | 42     | 207                | 0     | 2      | 7               | 7.1            | 4.1         | 1.3        |
| chrIII@267196to267234 | YCR089W   | FIG2  | ttccttATGctc   | 39     | 196                | 1     | 2      | 7               | 7.1            | 4.1         | 1.3        |
| chrIII@267227to267256 | YCR089W   | FIG2  | tagtctATGtat   | 30     | 174                | 1     | 1      | 7               | 7.1            | 4.1         | 1.3        |
| chrIII@267263to267274 | YCR089W   | FIG2  | gctacaATGgaa   | 12     | 156                | 3     | 0      | 7               | 7.1            | 4.1         | 1.3        |
| chrIII@267284to267325 | YCR089W   | FIG2  | taagaaATGcat   | 42     | 105                | 1     | 2      | 7               | 7.1            | 4.1         | 1.3        |
| chrIII@267288to267314 | YCR089W   | FIG2  | aaatgcATGaag   | 27     | 116                | 0     | 2      | 7               | 7.1            | 4.1         | 1.3        |
| chrIII@267336to267485 | YCR089W   | FIG2  | agtacaATGgaa   | 150    | -55                | 2     | 3      | 7               | 7.1            | 4.1         | 1.3        |
| chrIV@447616to447578  | YDL002C   | NHP10 | aattggATGaga   | 39     | 4                  | 2     | 28     | 5               | 189.1          | 224.4       | 53.7       |
| chrIV@366054to366049  | YDL049C   | KNH1  | acgaacATGtaa   | 6      | 176                | 0     | 1      | 3               | 50.7           | 13.6        | 2.3        |
| chrIV@366033to366004  | YDL049C   | KNH1  | gacattATGtgc   | 30     | 131                | 2     | 9      | 3               | 50.7           | 13.6        | 2.3        |
| chrIV@366021to366004  | YDL049C   | KNH1  | tcgttcATGtat   | 18     | 131                | 1     | 5      | 3               | 50.7           | 13.6        | 2.3        |
| chrIV@366007to365999  | YDL049C   | KNH1  | tattacATGagg   | 9      | 126                | 0     | 2      | 3               | 50.7           | 13.6        | 2.3        |
| chrIV@365968to365948  | YDL049C   | KNH1  | gtatcgATGaaa   | 21     | 75                 | 1     | 2      | 3               | 50.7           | 13.6        | 2.3        |
| chrIV@352706to352717  | YDL056W   | MBP1  | caacagATGaaa   | 12     | 159                | 0     | 0      | 4               | 20.8           | 29.8        | 13.7       |
| chrIV@352714to352797  | YDL056W   | MBP1  | gaaaaaATGaaa   | 84     | 79                 | 1     | 2      | 4               | 20.8           | 29.8        | 13.7       |
| chrIV@345018to344965  | YDL059C   | RAD59 | tagcacATGctt   | 54     | 13                 | 5     | 11     | 5               | 38.9           | 44.3        | 8.9        |
| chrIV@337300to336248  | YDL065C   | PEX19 | gaagaaATGcca   | 1053   | -1028              | 1     | 3      | 0               | 40.1           | 96.0        | 62.6       |
| chrIV@326562to326609  | YDL073W   |       | cttcgtATGcta   | 48     | 3                  | 3     | 7      | 4               | 58.7           | 71.6        | 8.8        |
| chrIV@326180to326145  | YDL074C   | BRE1  | gtttttATGcta   | 36     | -3                 | 1     | 16     | 2               | 108.9          | 134.1       | 38.5       |
| chrIV@321654to321640  | YDL076C   | RXT3  | aattccATGaca   | 15     | 89                 | 6     | 2      | 11              | 100.1          | 159.2       | 27.9       |
| chrIV@222371to222394  | YDL133W   |       | aagtgaATGata   | 24     | 32                 | 17    | 10     | 18              | 95.5           | 130.3       | 13.8       |
| chrIV@192698to192709  | YDL146W   | LDB17 | taacttATGtca   | 12     | 41                 | 5     | 3      | 6               | 45.2           | 22.8        | 5.3        |
| chrIV@141749to141714  | YDL177C   |       | gtattgATGttt   | 36     | -7                 | 8     | 6      | 17              | 106.0          | 157.1       | 11.2       |
| chrIV@135609to135725  | YDL180W   |       | tgactaATGtca   | 117    | 171                | 1     | 6      | 11              | 42.9           | 82.5        | 8.1        |
| chrIV@135649to135672  | YDL180W   |       | gtcccaATGcgg   | 24     | 224                | 1     | 0      | 11              | 42.9           | 82.5        | 8.1        |
| chrIV@135687to135725  | YDL180W   |       | tggaacATGgaa   | 39     | 171                | 0     | 3      | 11              | 42.9           | 82.5        | 8.1        |
| chrIV@122080to122166  | YDL189W   | RBS1  | gacagtATGttg   | 87     | 50                 | 2     | 9      | 3               | 30.9           | 39.0        | 31.2       |
| chrIV@122102to122128  | YDL189W   | RBS1  | cttataATGggc   | 27     | 88                 | 0     | 2      | 3               | 30.9           | 39.0        | 31.2       |
| chrIV@104619to104605  | YDL198C   | GGC1  | cttttgATGgtt   | 15     | 54                 | 15    | 5      | 16              | 40.4           | 52.9        | 72.7       |
| chrIV@101078to101064  | YDL200C   | MGT1  | atctaaATGgac   | 15     | -3                 | 3     | 6      | 0               | 57.2           | 89.4        | 26.1       |
| chrIV@94350to94370    | YDL204W   | RTN2  | tttgagATGctt   | 21     | 235                | 0     | 2      | 0               | 30.3           | 13.2        | 0.7        |
| chrIV@94499to94525    | YDL204W   | RTN2  | actttgATGaaa   | 27     | 80                 | 0     | 5      | 0               | 30.3           | 13.2        | 0.7        |
| chrIV@94540to94545    | YDL204W   | RTN2  | tcaattATGtag   | 6      | 60                 | 0     | 1      | 0               | 30.3           | 13.2        | 0.7        |
| chrIV@93874to93848    | YDL205C   | HEM3  | gtttgcATGgta   | 27     | 103                | 4     | 12     | 8               | 118.0          | 149.1       | 40.4       |
| chrIV@90141to90170    | YDL206W   |       | ttgtaaATGcta   | 30     | 6                  | 5     | 3      | 2               | 30.8           | 17.8        | 1.6        |
| chrIV@483903to483862  | YDR018C   |       | aaagaaATGaac   | 42     | 6                  | 0     | 4      | 0               | 20.7           | 1.5         | 1.0        |

Continued on next page

Table S3: All uORFs, continued

| uORF                   | CDS       | Gene   | Initiator Site | Length | uORF end<br>to CDS | # Rib | # mRNA | 5' UTR<br># Rib | 5' UTR<br>mRNA | CDS<br>mRNA | CDS<br>Rib |
|------------------------|-----------|--------|----------------|--------|--------------------|-------|--------|-----------------|----------------|-------------|------------|
| chrIV@521236to521262   | YDR034W-B |        | atttaaATGttt   | 27     | 48                 | 0     | 0      | 0               | 6.0            | 5.1         | 10.4       |
| chrIV@521249to521257   | YDR034W-B |        | tcagttATGttg   | 9      | 53                 | 0     | 0      | 0               | 6.0            | 5.1         | 10.4       |
| chrIV@548367to548356   | YDR045C   | RPC11  | cgttatATGgct   | 12     | 49                 | 32    | 18     | 34              | 333.2          | 352.7       | 117.6      |
| chrIV@550626to550573   | YDR046C   | BAP3   | ctattgATGgat   | 54     | 0                  | 11    | 30     | 17              | 129.2          | 125.3       | 44.6       |
| chrIV@551675to551710   | YDR047W   | HEM12  | agcgaaATGttc   | 36     | 147                | 0     | 13     | 6               | 93.9           | 143.2       | 38.6       |
| chrIV@551713to551736   | YDR047W   | HEM12  | ttagtgATGttc   | 24     | 121                | 4     | 10     | 6               | 93.9           | 143.2       | 38.6       |
| chrIV@583472to583410   | YDR067C   |        | agctatATGtat   | 63     | -52                | 0     | 0      | 4               | 118.3          | 162.1       | 20.7       |
| chrIV@587727to587689   | YDR069C   | DOA4   | tgatacATGctt   | 39     | -27                | 0     | 1      | 3               | 21.5           | 10.3        | 6.0        |
| chrIV@592335to592400   | YDR073W   | SNF11  | ccgtttATGata   | 66     | 35                 | 7     | 5      | 7               | 30.5           | 32.1        | 22.6       |
| chrIV@592389to592400   | YDR073W   | SNF11  | aattcaATGtgc   | 12     | 35                 | 1     | 1      | 7               | 30.5           | 32.1        | 22.6       |
| chrIV@602984to602976   | YDR078C   | SHU2   | agcaagATGgac   | 9      | 111                | 1     | 0      | 1               | 20.2           | 75.8        | 8.0        |
| chrIV@602909to602895   | YDR078C   | SHU2   | ttgggtATGgag   | 15     | 30                 | 0     | 0      | 1               | 20.2           | 75.8        | 8.0        |
| chrIV@610359to610409   | YDR082W   | STN1   | gaatatATGaaa   | 51     | 28                 | 2     | 19     | 7               | 75.4           | 95.0        | 1.4        |
| chrIV@610424to610444   | YDR082W   | STN1   | ttaataATGggt   | 21     | -7                 | 4     | 4      | 7               | 75.4           | 95.0        | 1.4        |
| chrIV@614007to613921   | YDR084C   | TVP23  | ttacgaATGaaa   | 87     | -79                | 0     | 0      | 0               | 51.4           | 97.8        | 54.8       |
| chrIV@626107to626048   | YDR090C   |        | taaataATGctt   | 60     | 54                 | 1     | 6      | 0               | 38.4           | 68.1        | 18.7       |
| chrIV@658134to658139   | YDR103W   | STE5   | ggcgatATGtag   | 6      | 207                | 0     | 0      | 0               | 11.1           | 37.1        | 15.5       |
| chrIV@658158to658193   | YDR103W   | STE5   | cacatcATGtac   | 36     | 153                | 0     | 3      | 0               | 11.1           | 37.1        | 15.5       |
| chrIV@658180to658200   | YDR103W   | STE5   | caaaatATGaaa   | 21     | 146                | 0     | 0      | 0               | 11.1           | 37.1        | 15.5       |
| chrIV@699484to699425   | YDR123C   | INO2   | aaatacATGgaa   | 60     | -39                | 1     | 1      | 5               | 18.2           | 38.9        | 11.9       |
| chrIV@704325to704360   | YDR127W   | ARO1   | ccgcaaATGtcg   | 36     | 120                | 0     | 0      | 1               | 34.7           | 30.0        | 86.2       |
| chrIV@751488to751658   | YDR147W   | EKI1   | aagtgATGcaa    | 171    | -31                | 1     | 33     | 1               | 52.2           | 82.0        | 15.5       |
| chrIV@751510to751527   | YDR147W   | EKI1   | caatagATGtcg   | 18     | 100                | 0     | 8      | 1               | 52.2           | 82.0        | 15.5       |
| chrIV@784231to784199   | YDR164C   | SEC1   | gtgcacATGctt   | 33     | -12                | 1     | 1      | 3               | 17.8           | 26.7        | 16.5       |
| chrIV@819220to819113   | YDR179C   | CSN9   | acagtgATGacc   | 108    | -79                | 1     | 6      | 1               | 25.6           | 69.7        | 21.0       |
| chrIV@819421to819465   | YDR179W-A |        | ttctatATGtgt   | 45     | -36                | 0     | 0      | 0               | 31.0           | 69.0        | 8.6        |
| chrIV@827365to827330   | YDR181C   | SAS4   | aagcatATGaga   | 36     | -21                | 3     | 3      | 4               | 50.1           | 51.3        | 9.4        |
| chrIV@829564to829596   | YDR183W   | PLP1   | acgtatATGgag   | 33     | -15                | 5     | 2      | 7               | 44.5           | 55.9        | 35.0       |
| chrIV@867535to867512   | YDR207C   | UME6   | atttgcATGgac   | 24     | -6                 | 1     | 0      | 2               | 16.4           | 12.8        | 13.0       |
| chrIV@930875to931036   | YDR234W   | LYS4   | taatcgATGagt   | 162    | 88                 | 3     | 41     | 11              | 56.2           | 74.6        | 47.3       |
| chrIV@930932to931036   | YDR234W   | LYS4   | aatctcATGtcc   | 105    | 88                 | 3     | 35     | 11              | 56.2           | 74.6        | 47.3       |
| chrIV@946535to946552   | YDR242W   | AMD2   | agtattATGtgt   | 18     | 250                | 0     | 3      | 6               | 13.4           | 27.5        | 1.1        |
| chrIV@946589to946645   | YDR242W   | AMD2   | tctcaaATGccg   | 57     | 157                | 1     | 3      | 6               | 13.4           | 27.5        | 1.1        |
| chrIV@946611to946619   | YDR242W   | AMD2   | ttgctcATGata   | 9      | 183                | 0     | 0      | 6               | 13.4           | 27.5        | 1.1        |
| chrIV@946634to946645   | YDR242W   | AMD2   | aataatATGata   | 12     | 157                | 1     | 1      | 6               | 13.4           | 27.5        | 1.1        |
| chrIV@946642to946863   | YDR242W   | AMD2   | gataatATGata   | 222    | -61                | 5     | 11     | 6               | 13.4           | 27.5        | 1.1        |
| chrIV@946732to946863   | YDR242W   | AMD2   | ttttcaATGggg   | 132    | -61                | 5     | 8      | 6               | 13.4           | 27.5        | 1.1        |
| chrIV@952778to952843   | YDR245W   | MNN10  | ttgtgcATGtac   | 66     | -48                | 1     | 18     | 5               | 346.8          | 303.3       | 57.6       |
| chrIV@958354to958334   | YDR248C   |        | aagcgtATGgat   | 21     | 0                  | 3     | 8      | 3               | 95.6           | 91.9        | 27.9       |
| chrIV@958350to958300   | YDR248C   |        | gtatggATGgac   | 51     | -34                | 3     | 7      | 3               | 95.6           | 91.9        | 27.9       |
| chrIV@964678to964652   | YDR253C   | MET32  | ctatccATGgta   | 27     | 92                 | 0     | 1      | 1               | 9.3            | 7.6         | 4.3        |
| chrIV@964669to964652   | YDR253C   | MET32  | gtatatATGtat   | 18     | 92                 | 0     | 1      | 1               | 9.3            | 7.6         | 4.3        |
| chrIV@964665to964648   | YDR253C   | MET32  | atatgtATGcat   | 18     | 88                 | 0     | 2      | 1               | 9.3            | 7.6         | 4.3        |
| chrIV@964637to964605   | YDR253C   | MET32  | ggtttcATGtca   | 33     | 45                 | 0     | 2      | 1               | 9.3            | 7.6         | 4.3        |
| chrIV@964630to964613   | YDR253C   | MET32  | tgatcatATGcca  | 18     | 53                 | 0     | 2      | 1               | 9.3            | 7.6         | 4.3        |
| chrIV@1019240to1019266 | YDR279W   | RNH202 | agcgcgATGaga   | 27     | 97                 | 1     | 0      | 6               | 29.7           | 73.7        | 24.8       |

Continued on next page



Table S3: All uORFs, continued

| uORF                   | CDS       | Gene   | Initiator Site | Length | uORF end<br>to CDS | # Rib | # mRNA | 5' UTR<br># Rib | 5' UTR<br>mRNA | CDS<br>mRNA | CDS<br>Rib |
|------------------------|-----------|--------|----------------|--------|--------------------|-------|--------|-----------------|----------------|-------------|------------|
| chrIV@1019266to1019328 | YDR279W   | RNH202 | tggttaATGatt   | 63     | -35                | 5     | 9      | 6               | 29.7           | 73.7        | 24.8       |
| chrIV@1030052to1030035 | YDR283C   | GCN2   | cataactATGtat  | 18     | -9                 | 0     | 1      | 25              | 18.3           | 19.8        | 11.2       |
| chrIV@1037144to1037170 | YDR288W   | NSE3   | atcagtATGcta   | 27     | 20                 | 2     | 12     | 0               | 181.5          | 138.0       | 17.6       |
| chrIV@1062912to1062898 | YDR300C   | PRO1   | gaactaATGctt   | 15     | 112                | 0     | 0      | 2               | 39.4           | 152.1       | 66.7       |
| chrIV@1062901to1062863 | YDR300C   | PRO1   | ttctcgATGaat   | 39     | 77                 | 0     | 0      | 2               | 39.4           | 152.1       | 66.7       |
| chrIV@1062863to1062783 | YDR300C   | PRO1   | agattaATGtct   | 81     | -3                 | 2     | 22     | 2               | 39.4           | 152.1       | 66.7       |
| chrIV@1078457to1078434 | YDR308C   | SRB7   | cattatATGctc   | 24     | -10                | 2     | 9      | 4               | 228.9          | 154.1       | 67.9       |
| chrIV@1116860to1116916 | YDR325W   | YCG1   | aaaatcATGggg   | 57     | 204                | 1     | 3      | 1               | 15.5           | 40.5        | 7.0        |
| chrIV@1116890to1116916 | YDR325W   | YCG1   | gagataATGcag   | 27     | 204                | 0     | 1      | 1               | 15.5           | 40.5        | 7.0        |
| chrIV@1117002to1117013 | YDR325W   | YCG1   | ccgcatATGaaa   | 12     | 107                | 0     | 2      | 1               | 15.5           | 40.5        | 7.0        |
| chrIV@1117073to1117225 | YDR325W   | YCG1   | tcagtaATGcct   | 153    | -105               | 0     | 3      | 1               | 15.5           | 40.5        | 7.0        |
| chrIV@1130927to1130998 | YDR332W   | IRC3   | ttcataATGtca   | 72     | -3                 | 0     | 7      | 2               | 45.1           | 30.1        | 2.5        |
| chrIV@1130979to1131017 | YDR332W   | IRC3   | ggagccATGagt   | 39     | -22                | 0     | 0      | 2               | 45.1           | 30.1        | 2.5        |
| chrIV@1135874to1135942 | YDR334W   | SWR1   | aaatttATGaat   | 69     | -16                | 19    | 6      | 21              | 25.8           | 20.9        | 6.5        |
| chrIV@1149550to1149521 | YDR338C   |        | tatttgATGctg   | 30     | 62                 | 0     | 3      | 0               | 25.3           | 36.9        | 11.0       |
| chrIV@1178180to1178160 | YDR350C   | ATP22  | actttaATGttc   | 21     | -6                 | 1     | 2      | 10              | 89.0           | 61.2        | 3.9        |
| chrIV@1178259to1178264 | YDR351W   | SBE2   | atcttcATGtaa   | 6      | 394                | 0     | 0      | 14              | 20.8           | 37.7        | 16.1       |
| chrIV@1178281to1178475 | YDR351W   | SBE2   | ccttttATGcaa   | 195    | 183                | 0     | 3      | 14              | 20.8           | 37.7        | 16.1       |
| chrIV@1178293to1178475 | YDR351W   | SBE2   | tctataATGtta   | 183    | 183                | 0     | 3      | 14              | 20.8           | 37.7        | 16.1       |
| chrIV@1178364to1178369 | YDR351W   | SBE2   | aaagagATGtaa   | 6      | 289                | 0     | 0      | 14              | 20.8           | 37.7        | 16.1       |
| chrIV@1189625to1189596 | YDR357C   |        | ttttacATGaaa   | 30     | 37                 | 10    | 23     | 9               | 156.1          | 146.3       | 38.3       |
| chrIV@1198786to1198778 | YDR362C   | TFC6   | agtttcATGtcc   | 9      | 90                 | 1     | 0      | 2               | 37.6           | 41.0        | 11.2       |
| chrIV@1204224to1204192 | YDR364C   | CDC40  | cacggcATGtac   | 33     | -9                 | 0     | 3      | 3               | 37.1           | 87.0        | 12.6       |
| chrIV@1204206to1204192 | YDR364C   | CDC40  | gagcagATGaaa   | 15     | -9                 | 0     | 0      | 3               | 37.1           | 87.0        | 12.6       |
| chrIV@1206467to1206441 | YDR365C   | ESF1   | agcataATGgta   | 27     | 67                 | 0     | 29     | 1               | 176.5          | 250.2       | 64.3       |
| chrIV@1233555to1233550 | YDR379C-A |        | aagataATGtag   | 6      | 42                 | 2     | 0      | 6               | 65.4           | 100.1       | 20.4       |
| chrIV@1230147to1230200 | YDR379W   | RGA2   | attttgATGaaa   | 54     | -42                | 3     | 0      | 4               | 10.1           | 22.1        | 8.3        |
| chrIV@1249921to1249895 | YDR387C   |        | ccttatATGtgc   | 27     | 83                 | 0     | 7      | 10              | 38.1           | 53.0        | 2.5        |
| chrIV@1249891to1249820 | YDR387C   |        | tagtccATGgtc   | 72     | 8                  | 10    | 12     | 10              | 38.1           | 53.0        | 2.5        |
| chrIV@1258574to1258579 | YDR392W   | SPT3   | cgaaccATGtaa   | 6      | 108                | 0     | 0      | 0               | 24.1           | 51.1        | 15.0       |
| chrIV@1267332to1267340 | YDR398W   | UTP5   | gaagcgATGagg   | 9      | 122                | 0     | 1      | 4               | 94.6           | 178.7       | 55.8       |
| chrIV@1267369to1267401 | YDR398W   | UTP5   | ggatatATGtat   | 33     | 61                 | 2     | 11     | 4               | 94.6           | 178.7       | 55.8       |
| chrIV@1267373to1267378 | YDR398W   | UTP5   | atatgtATGtaa   | 6      | 84                 | 0     | 2      | 4               | 94.6           | 178.7       | 55.8       |
| chrIV@1267385to1267417 | YDR398W   | UTP5   | agatagATGcag   | 33     | 45                 | 3     | 12     | 4               | 94.6           | 178.7       | 55.8       |
| chrIV@1270940to1272076 | YDR400W   | URH1   | cttttgATGgaa   | 1137   | -1022              | 0     | 2      | 1               | 11.6           | 39.3        | 27.2       |
| chrIV@1296820to1296785 | YDR414C   | ERD1   | atatgtATGgca   | 36     | 108                | 1     | 9      | 6               | 77.3           | 54.3        | 14.2       |
| chrIV@1317932to1317918 | YDR422C   | SIP1   | tctctgATGgaa   | 15     | 154                | 0     | 0      | 0               | 7.4            | 25.7        | 15.4       |
| chrIV@1317908to1315317 | YDR422C   | SIP1   | ttaacaATGgta   | 2592   | -2447              | 0     | 6      | 0               | 7.4            | 25.7        | 15.4       |
| chrIV@1338020to1338136 | YDR438W   | THI74  | cataatATGggg   | 117    | 129                | 0     | 16     | 0               | 24.8           | 36.8        | 0.0        |
| chrIV@1338034to1338066 | YDR438W   | THI74  | actggaATGtat   | 33     | 199                | 0     | 8      | 0               | 24.8           | 36.8        | 0.0        |
| chrIV@1338038to1338136 | YDR438W   | THI74  | gaatgtATGcac   | 99     | 129                | 0     | 12     | 0               | 24.8           | 36.8        | 0.0        |
| chrIV@1338060to1338074 | YDR438W   | THI74  | tattatATGgtg   | 15     | 191                | 0     | 1      | 0               | 24.8           | 36.8        | 0.0        |
| chrIV@1338074to1338136 | YDR438W   | THI74  | gctgtaATGctt   | 63     | 129                | 0     | 5      | 0               | 24.8           | 36.8        | 0.0        |
| chrIV@1338150to1338224 | YDR438W   | THI74  | atatagATGaaa   | 75     | 41                 | 0     | 10     | 0               | 24.8           | 36.8        | 0.0        |
| chrIV@1338162to1338224 | YDR438W   | THI74  | gttgaaATGaat   | 63     | 41                 | 0     | 10     | 0               | 24.8           | 36.8        | 0.0        |
| chrIV@1338190to1338249 | YDR438W   | THI74  | ataataATGcag   | 60     | 16                 | 0     | 4      | 0               | 24.8           | 36.8        | 0.0        |

Continued on next page

Table S3: All uORFs, continued

| uORF                   | CDS       | Gene  | Initiator Site | Length | uORF end to CDS | # Rib | # mRNA | 5' UTR # Rib | 5' UTR mRNA | CDS mRNA | CDS Rib |
|------------------------|-----------|-------|----------------|--------|-----------------|-------|--------|--------------|-------------|----------|---------|
| chrIV@1338217to1338249 | YDR438W   | THI74 | ttagatATGtat   | 33     | 16              | 0     | 0      | 0            | 24.8        | 36.8     | 0.0     |
| chrIV@1338230to1338256 | YDR438W   | THI74 | agagtgATGgta   | 27     | 9               | 0     | 2      | 0            | 24.8        | 36.8     | 0.0     |
| chrIV@1339425to1339478 | YDR439W   | LRS4  | aattatATGtct   | 54     | 189             | 0     | 5      | 6            | 13.3        | 20.9     | 14.4    |
| chrIV@1339456to1339527 | YDR439W   | LRS4  | aagttaATGtct   | 72     | 140             | 0     | 4      | 6            | 13.3        | 20.9     | 14.4    |
| chrIV@1339466to1339567 | YDR439W   | LRS4  | ctataaATGccc   | 102    | 100             | 2     | 4      | 6            | 13.3        | 20.9     | 14.4    |
| chrIV@1339500to1339517 | YDR439W   | LRS4  | ttttgcATGgta   | 18     | 150             | 0     | 0      | 6            | 13.3        | 20.9     | 14.4    |
| chrIV@1339505to1339567 | YDR439W   | LRS4  | catggatATGtat  | 63     | 100             | 2     | 0      | 6            | 13.3        | 20.9     | 14.4    |
| chrIV@1339564to1339572 | YDR439W   | LRS4  | aagaaaATGatg   | 9      | 95              | 2     | 0      | 6            | 13.3        | 20.9     | 14.4    |
| chrIV@1339567to1339572 | YDR439W   | LRS4  | aaaatgATGtga   | 6      | 95              | 2     | 0      | 6            | 13.3        | 20.9     | 14.4    |
| chrIV@1345232to1345020 | YDR441C   | APT2  | aatcctATGttg   | 213    | -33             | 2     | 42     | 2            | 44.1        | 38.0     | 42.1    |
| chrIV@1345084to1345040 | YDR441C   | APT2  | gtgtatATGcct   | 45     | -13             | 0     | 7      | 2            | 44.1        | 38.0     | 42.1    |
| chrIV@1362719to1362748 | YDR452W   | PPN1  | ggttttATGgta   | 30     | 121             | 6     | 3      | 5            | 109.8       | 132.7    | 27.7    |
| chrIV@1383438to1383388 | YDR459C   | PFA5  | ttgtatATGaat   | 51     | -46             | 0     | 0      | 0            | 46.7        | 87.6     | 5.1     |
| chrIV@1385760to1385515 | YDR461C-A |       | cagattATGatg   | 246    | -242            | 0     | 0      | 0            | 150.2       | 114.4    | 51.3    |
| chrIV@1395105to1395122 | YDR466W   | PKH3  | attggtATGaca   | 18     | -10             | 0     | 0      | 0            | 19.8        | 20.1     | 8.2     |
| chrIV@1417130to1417141 | YDR480W   | DIG2  | aaagtgATGcac   | 12     | 249             | 0     | 1      | 6            | 13.6        | 23.9     | 12.9    |
| chrIV@1417138to1417185 | YDR480W   | DIG2  | gcacgtATGatg   | 48     | 205             | 4     | 3      | 6            | 13.6        | 23.9     | 12.9    |
| chrIV@1417141to1417185 | YDR480W   | DIG2  | cgtatgATGata   | 45     | 205             | 4     | 3      | 6            | 13.6        | 23.9     | 12.9    |
| chrIV@1417195to1417251 | YDR480W   | DIG2  | tgtgatATGtca   | 57     | 139             | 0     | 1      | 6            | 13.6        | 23.9     | 12.9    |
| chrIV@1417251to1417274 | YDR480W   | DIG2  | tacataATGtgc   | 24     | 116             | 0     | 0      | 6            | 13.6        | 23.9     | 12.9    |
| chrIV@1417304to1417351 | YDR480W   | DIG2  | ttattatATGtta  | 48     | 39              | 2     | 4      | 6            | 13.6        | 23.9     | 12.9    |
| chrIV@1417341to1417355 | YDR480W   | DIG2  | gtatttATGtgg   | 15     | 35              | 0     | 1      | 6            | 13.6        | 23.9     | 12.9    |
| chrIV@1420927to1420916 | YDR482C   | CWC21 | tcaagaATGgca   | 12     | 87              | 0     | 1      | 0            | 35.8        | 78.2     | 22.6    |
| chrIV@1421091to1421102 | YDR483W   | KRE2  | cattttATGaat   | 12     | 46              | 7     | 3      | 4            | 70.7        | 226.6    | 150.9   |
| chrIV@1468513to1468463 | YDR508C   | GNP1  | tgctttATGttt   | 51     | 28              | 12    | 24     | 12           | 91.4        | 196.8    | 116.4   |
| chrIV@1477114to1477158 | YDR517W   | GRH1  | aaagaaATGggc   | 45     | 72              | 0     | 4      | 1            | 51.2        | 85.9     | 48.4    |
| chrIV@1488995to1488981 | YDR524C   | AGE1  | ttctggATGttc   | 15     | 0               | 13    | 2      | 13           | 34.2        | 21.3     | 10.4    |
| chrIV@1489297to1489305 | YDR524W-C |       | tagataATGaat   | 9      | 89              | 0     | 0      | 0            | 3.6         | 2.2      | 0.0     |
| chrIV@1498206to1498298 | YDR531W   |       | gagtgATGcga    | 93     | -75             | 0     | 9      | 0            | 155.8       | 177.1    | 43.4    |
| chrIV@1520864to1520856 | YDR541C   |       | agggatATGata   | 9      | 175             | 2     | 0      | 2            | 18.0        | 28.2     | 2.8     |
| chrV@140123to140112    | YEL009C   | GCN4  | tgaaaaATGgct   | 12     | 350             | 698   | 25     | 878          | 407.8       | 614.3    | 38.4    |
| chrV@140055to140047    | YEL009C   | GCN4  | agaattATGtgt   | 9      | 285             | 26    | 6      | 878          | 407.8       | 614.3    | 38.4    |
| chrV@139938to139927    | YEL009C   | GCN4  | gctatcATGtac   | 12     | 165             | 61    | 13     | 878          | 407.8       | 614.3    | 38.4    |
| chrV@139913to139902    | YEL009C   | GCN4  | ttcaagATGttt   | 12     | 140             | 14    | 19     | 878          | 407.8       | 614.3    | 38.4    |
| chrV@126337to126281    | YEL016C   | NPP2  | gcgttgATGgaa   | 57     | 64              | 4     | 11     | 5            | 67.2        | 69.0     | 5.0     |
| chrV@126313to126281    | YEL016C   | NPP2  | ctttatATGact   | 33     | 64              | 1     | 6      | 5            | 67.2        | 69.0     | 5.0     |
| chrV@84571to84551      | YEL036C   | ANP1  | gctttcATGcaa   | 21     | 0               | 1     | 4      | 4            | 73.7        | 115.8    | 38.1    |
| chrV@69663to69674      | YEL044W   | IES6  | tgaggaATGgaa   | 12     | 82              | 1     | 0      | 1            | 58.2        | 213.0    | 45.9    |
| chrV@42706to42638      | YEL059C-A | SOM1  | atagagATGgac   | 69     | 15              | 0     | 6      | 0            | 16.4        | 17.6     | 10.0    |
| chrV@31249to31238      | YEL064C   | AVT2  | atacatATGttc   | 12     | 0               | 1     | 0      | 0            | 80.1        | 36.7     | 8.1     |
| chrV@27538to27546      | YEL065W   | SIT1  | tttgtgATGcga   | 9      | 110             | 2     | 2      | 2            | 31.1        | 90.2     | 31.1    |
| chrV@27543to27617      | YEL065W   | SIT1  | gatgcgATGatt   | 75     | 39              | 2     | 8      | 2            | 31.1        | 90.2     | 31.1    |
| chrV@27568to27591      | YEL065W   | SIT1  | taagcaATGgac   | 24     | 65              | 0     | 2      | 2            | 31.1        | 90.2     | 31.1    |
| chrV@27588to27617      | YEL065W   | SIT1  | tcaccgATGagg   | 30     | 39              | 0     | 2      | 2            | 31.1        | 90.2     | 31.1    |
| chrV@13599to13634      | YEL072W   | RMD6  | aacagtATGgat   | 36     | 85              | 10    | 6      | 8            | 38.2        | 53.1     | 2.7     |
| chrV@13696to13719      | YEL072W   | RMD6  | tctatcATGccc   | 24     | 0               | 0     | 6      | 8            | 38.2        | 53.1     | 2.7     |

Continued on next page

Table S3: All uORFs, continued

| uORF                  | CDS       | Gene  | Initiator Site | Length | uORF end<br>to CDS | # Rib | # mRNA | 5' UTR<br># Rib | 5' UTR<br>mRNA | CDS<br>mRNA | CDS<br>Rib |
|-----------------------|-----------|-------|----------------|--------|--------------------|-------|--------|-----------------|----------------|-------------|------------|
| chrV@164468to164482   | YER007W   | PAC2  | tttattATGttt   | 15     | 43                 | 0     | 3      | 0               | 54.8           | 44.1        | 6.2        |
| chrV@164500to164523   | YER007W   | PAC2  | tataaaATGcaa   | 24     | 2                  | 0     | 4      | 0               | 54.8           | 44.1        | 6.2        |
| chrV@211952to211932   | YER028C   | MIG3  | cttgccATGagt   | 21     | 58                 | 0     | 1      | 0               | 4.4            | 8.4         | 5.2        |
| chrV@213414to213896   | YER030W   | CHZ1  | caatacATGgaa   | 483    | -461               | 5     | 1      | 5               | 58.4           | 171.8       | 179.5      |
| chrV@254417to254400   | YER050C   | RSM18 | agatgaATGcca   | 18     | 15                 | 10    | 6      | 8               | 87.6           | 210.3       | 81.7       |
| chrV@259734to259720   | YER053C   | PIC2  | cagtcaATGaca   | 15     | 83                 | 1     | 0      | 1               | 29.0           | 31.2        | 10.0       |
| chrV@280864to280814   | YER062C   | HOR2  | cttttgATGttg   | 51     | 135                | 1     | 0      | 3               | 20.9           | 67.6        | 80.3       |
| chrV@280836to280804   | YER062C   | HOR2  | atatatATGcgc   | 33     | 125                | 1     | 1      | 3               | 20.9           | 67.6        | 80.3       |
| chrV@287152to287147   | YER065C   | ICL1  | cccagtATGtga   | 6      | 236                | 1     | 1      | 1               | 7.2            | 14.5        | 0.5        |
| chrV@303882to303887   | YER073W   | ALD5  | agccccATGtaa   | 6      | 139                | 1     | 0      | 9               | 123.4          | 209.1       | 167.8      |
| chrV@335619to335605   | YER088C   | DOT6  | cgtcccATGagg   | 15     | 422                | 0     | 0      | 1               | 14.9           | 48.5        | 39.5       |
| chrV@335590to335414   | YER088C   | DOT6  | gcgcgATGttt    | 177    | 231                | 0     | 5      | 1               | 14.9           | 48.5        | 39.5       |
| chrV@335581to335414   | YER088C   | DOT6  | tttccgATGcaa   | 168    | 231                | 0     | 5      | 1               | 14.9           | 48.5        | 39.5       |
| chrV@335565to335284   | YER088C   | DOT6  | gaaaggATGgac   | 282    | 101                | 0     | 16     | 1               | 14.9           | 48.5        | 39.5       |
| chrV@348468to348448   | YER093C-A |       | attaggATGggg   | 21     | 53                 | 0     | 1      | 0               | 11.8           | 22.2        | 18.7       |
| chrV@349545to349540   | YER094C   | PUP3  | gtagtcATGtga   | 6      | 199                | 0     | 0      | 8               | 202.3          | 571.4       | 190.2      |
| chrV@349535to349446   | YER094C   | PUP3  | gaccggATGgca   | 90     | 105                | 0     | 0      | 8               | 202.3          | 571.4       | 190.2      |
| chrV@349506to349492   | YER094C   | PUP3  | gtgcaaATGcag   | 15     | 151                | 0     | 0      | 8               | 202.3          | 571.4       | 190.2      |
| chrV@349495to349430   | YER094C   | PUP3  | ggggcgATGaaa   | 66     | 89                 | 0     | 6      | 8               | 202.3          | 571.4       | 190.2      |
| chrV@349470to349462   | YER094C   | PUP3  | gagtttATGgca   | 9      | 121                | 0     | 0      | 8               | 202.3          | 571.4       | 190.2      |
| chrV@402281to402292   | YER121W   |       | aaataaATGaata  | 12     | 78                 | 0     | 0      | 0               | 5.9            | 16.7        | 3.6        |
| chrV@416936to416950   | YER129W   | SAK1  | tagcatATGgaa   | 15     | 326                | 1     | 2      | 7               | 34.6           | 32.9        | 8.7        |
| chrV@417160to417168   | YER129W   | SAK1  | taattgATGttt   | 9      | 108                | 1     | 2      | 7               | 34.6           | 32.9        | 8.7        |
| chrV@492114to492106   | YER159C   | BUR6  | agggcaATGcac   | 9      | 154                | 11    | 3      | 7               | 38.2           | 98.5        | 90.9       |
| chrV@503784to503773   | YER163C   |       | agttgtATGgcc   | 12     | -3                 | 0     | 0      | 0               | 20.0           | 74.9        | 22.9       |
| chrV@540433to540419   | YER175C   | TMT1  | tttagtATGttt   | 15     | 62                 | 0     | 5      | 0               | 50.1           | 47.7        | 9.1        |
| chrV@540400to540383   | YER175C   | TMT1  | gttggtATGaga   | 18     | 26                 | 0     | 8      | 0               | 50.1           | 47.7        | 9.1        |
| chrV@550622to550560   | YER180C   | ISC10 | tcactcATGatc   | 63     | 39                 | 0     | 35     | 0               | 83.1           | 94.4        | 0.3        |
| chrV@562644to562603   | YER186C   |       | tagtatATGatc   | 42     | -16                | 0     | 21     | 0               | 190.3          | 135.0       | 0.9        |
| chrVI@81941to81933    | YFL027C   | GYP8  | tagcaaATGaca   | 9      | 24                 | 0     | 0      | 0               | 38.2           | 143.8       | 9.1        |
| chrVI@79195to79145    | YFL029C   | CAK1  | ggccagATGgaa   | 51     | -13                | 1     | 4      | 1               | 23.6           | 43.0        | 11.0       |
| chrVI@155911to155867  | YFR005C   | SAD1  | ctcttcATGgtt   | 45     | 0                  | 0     | 6      | 0               | 38.8           | 118.5       | 19.0       |
| chrVI@206318to206268  | YFR026C   |       | aggataATGatc   | 51     | 24                 | 0     | 1      | 0               | 18.9           | 16.4        | 0.0        |
| chrVI@246080to246142  | YFR048W   | RMD8  | gttcgtATGcaa   | 63     | -10                | 5     | 11     | 5               | 48.7           | 41.4        | 11.7       |
| chrVI@246094to246135  | YFR048W   | RMD8  | ttgcatATGgag   | 42     | -3                 | 5     | 9      | 5               | 48.7           | 41.4        | 11.7       |
| chrVII@494409to494453 | YGL002W   | ERP6  | caagatATGggg   | 45     | 67                 | 1     | 11     | 1               | 81.4           | 139.2       | 22.4       |
| chrVII@490627to490607 | YGL005C   | COG7  | gtgataATGcat   | 21     | 57                 | 0     | 4      | 1               | 34.7           | 116.1       | 20.1       |
| chrVII@490610to490596 | YGL005C   | COG7  | ttccatATGaaa   | 15     | 46                 | 1     | 1      | 1               | 34.7           | 116.1       | 20.1       |
| chrVII@490603to490544 | YGL005C   | COG7  | tgaatATGtct    | 60     | -6                 | 1     | 6      | 1               | 34.7           | 116.1       | 20.1       |
| chrVII@436945to436904 | YGL032C   | AGA2  | ggtgatATGtta   | 42     | 67                 | 6     | 10     | 12              | 38.1           | 71.5        | 87.6       |
| chrVII@436907to436839 | YGL032C   | AGA2  | tctagaATGatt   | 69     | 2                  | 7     | 9      | 12              | 38.1           | 71.5        | 87.6       |
| chrVII@392205to392216 | YGL059W   | PKP2  | ttgtcaATGgat   | 12     | 11                 | 0     | 0      | 0               | 28.6           | 29.8        | 3.6        |
| chrVII@371932to371964 | YGL071W   | AFT1  | cgattcATGcta   | 33     | 50                 | 10    | 1      | 12              | 17.4           | 18.2        | 16.4       |
| chrVII@359419to359436 | YGL079W   |       | aaaataATGgtt   | 18     | 10                 | 2     | 2      | 2               | 34.3           | 31.3        | 11.9       |
| chrVII@352365to352291 | YGL084C   | GUP1  | atatagATGtta   | 75     | -9                 | 0     | 6      | 0               | 24.5           | 63.9        | 27.7       |
| chrVII@346940to346875 | YGL087C   | MMS2  | ctgtatATGcaa   | 66     | -31                | 1     | 9      | 1               | 62.6           | 63.1        | 110.1      |

Continued on next page

Table S3: All uORFs, continued

| uORF                  | CDS       | Gene  | Initiator Site | Length | uORF end<br>to CDS | # Rib | # mRNA | 5' UTR<br># Rib | 5' UTR<br>mRNA | CDS<br>mRNA | CDS<br>Rib |
|-----------------------|-----------|-------|----------------|--------|--------------------|-------|--------|-----------------|----------------|-------------|------------|
| chrVII@343298to343333 | YGL090W   | LIF1  | cattggATGact   | 36     | -12                | 2     | 3      | 2               | 33.4           | 16.9        | 2.4        |
| chrVII@343309to343314 | YGL090W   | LIF1  | ttatttATGtag   | 6      | 7                  | 0     | 0      | 2               | 33.4           | 16.9        | 2.4        |
| chrVII@334481to334464 | YGL094C   | PAN2  | ttctgaATGgtg   | 18     | -3                 | 10    | 2      | 16              | 26.9           | 14.7        | 8.0        |
| chrVII@334474to334460 | YGL094C   | PAN2  | tggtgaATGtat   | 15     | -7                 | 0     | 0      | 16              | 26.9           | 14.7        | 8.0        |
| chrVII@325135to325236 | YGL096W   | TOS8  | aaataaATGctg   | 102    | 97                 | 1     | 5      | 1               | 12.8           | 18.3        | 2.5        |
| chrVII@325180to325236 | YGL096W   | TOS8  | atatatATGgaa   | 57     | 97                 | 0     | 5      | 1               | 12.8           | 18.3        | 2.5        |
| chrVII@325215to325292 | YGL096W   | TOS8  | acagtcATGcat   | 78     | 41                 | 0     | 12     | 1               | 12.8           | 18.3        | 2.5        |
| chrVII@295847to295891 | YGL113W   | SLD3  | aaagtcATGggc   | 45     | 43                 | 0     | 2      | 0               | 16.5           | 37.7        | 3.1        |
| chrVII@255643to255654 | YGL134W   | PCL10 | tattccATGcgc   | 12     | 13                 | 2     | 7      | 3               | 72.0           | 78.3        | 3.5        |
| chrVII@253895to253860 | YGL136C   | MRM2  | gaagtaATGact   | 36     | -3                 | 6     | 6      | 4               | 43.5           | 77.6        | 4.5        |
| chrVII@186027to186113 | YGL169W   | SUA5  | tttttaATGgta   | 87     | -49                | 9     | 9      | 13              | 59.5           | 74.0        | 24.4       |
| chrVII@174518to174664 | YGL174W   | BUD13 | actcgaATGgtg   | 147    | -114               | 1     | 0      | 0               | 7.4            | 24.7        | 23.9       |
| chrVII@173205to173185 | YGL176C   |       | tgccatATGgga   | 21     | 101                | 0     | 1      | 0               | 17.7           | 22.1        | 2.8        |
| chrVII@173175to173167 | YGL176C   |       | aaggcaATGgaga  | 9      | 83                 | 0     | 0      | 0               | 17.7           | 22.1        | 2.8        |
| chrVII@173170to173132 | YGL176C   |       | aatgagATGaac   | 39     | 48                 | 0     | 3      | 0               | 17.7           | 22.1        | 2.8        |
| chrVII@173160to173089 | YGL176C   |       | acaacaATGgaa   | 72     | 5                  | 0     | 9      | 0               | 17.7           | 22.1        | 2.8        |
| chrVII@165181to165116 | YGL179C   | TOS3  | tatataATGctc   | 66     | 20                 | 0     | 6      | 1               | 10.6           | 18.7        | 5.8        |
| chrVII@150532to150497 | YGL187C   | COX4  | tttgaaATGtat   | 36     | 321                | 0     | 2      | 20              | 97.1           | 227.1       | 153.1      |
| chrVII@150528to150520 | YGL187C   | COX4  | aaatgtATGtta   | 9      | 344                | 0     | 0      | 20              | 97.1           | 227.1       | 153.1      |
| chrVII@150500to150459 | YGL187C   | COX4  | aaatacATGgaga  | 42     | 283                | 0     | 3      | 20              | 97.1           | 227.1       | 153.1      |
| chrVII@150495to150490 | YGL187C   | COX4  | catgagATGtag   | 6      | 314                | 0     | 1      | 20              | 97.1           | 227.1       | 153.1      |
| chrVII@150310to150206 | YGL187C   | COX4  | catataATGgag   | 105    | 30                 | 2     | 22     | 20              | 97.1           | 227.1       | 153.1      |
| chrVII@150298to150206 | YGL187C   | COX4  | aattcgATGcga   | 93     | 30                 | 1     | 20     | 20              | 97.1           | 227.1       | 153.1      |
| chrVII@150206to150189 | YGL187C   | COX4  | attttgATGttg   | 18     | 13                 | 0     | 2      | 20              | 97.1           | 227.1       | 153.1      |
| chrVII@139987to139982 | YGL194C-A |       | cagtccATGtaa   | 6      | 16                 | 0     | 1      | 0               | 103.2          | 137.3       | 38.7       |
| chrVII@124477to124488 | YGL197W   | MDS3  | tttctgATGaat   | 12     | 214                | 0     | 0      | 0               | 11.4           | 10.2        | 8.1        |
| chrVII@124594to124611 | YGL197W   | MDS3  | cattacATGgtg   | 18     | 91                 | 0     | 0      | 0               | 11.4           | 10.2        | 8.1        |
| chrVII@92487to92549   | YGL211W   | NCS6  | gacgatATGgta   | 63     | -34                | 0     | 8      | 0               | 63.2           | 139.0       | 17.3       |
| chrVII@78988to78953   | YGL224C   | SDT1  | atatatATGttt   | 36     | 98                 | 0     | 10     | 5               | 51.5           | 92.2        | 20.5       |
| chrVII@78968to78909   | YGL224C   | SDT1  | gtatctATGtgg   | 60     | 54                 | 0     | 6      | 5               | 51.5           | 92.2        | 20.5       |
| chrVII@78892to78845   | YGL224C   | SDT1  | gaatacATGagt   | 48     | -10                | 4     | 8      | 5               | 51.5           | 92.2        | 20.5       |
| chrVII@38824to38810   | YGL246C   | RAI1  | tgtaatATGgtg   | 15     | 31                 | 2     | 2      | 2               | 115.2          | 201.1       | 35.2       |
| chrVII@31834to31875   | YGL250W   | RMR1  | gtatatATGatt   | 42     | 34                 | 0     | 1      | 0               | 9.5            | 26.4        | 8.5        |
| chrVII@31897to32634   | YGL250W   | RMR1  | gtatcaATGgaa   | 738    | -725               | 0     | 0      | 0               | 9.5            | 26.4        | 8.5        |
| chrVII@14725to14790   | YGL256W   | ADH4  | ccttcaATGgac   | 66     | 119                | 3     | 29     | 16              | 59.0           | 113.7       | 14.0       |
| chrVII@14773to14790   | YGL256W   | ADH4  | agtggtATGttg   | 18     | 119                | 2     | 6      | 16              | 59.0           | 113.7       | 14.0       |
| chrVII@14781to14840   | YGL256W   | ADH4  | gttgacATGgtt   | 60     | 69                 | 1     | 25     | 16              | 59.0           | 113.7       | 14.0       |
| chrVII@14809to14934   | YGL256W   | ADH4  | ttgtgtATGatg   | 126    | -25                | 12    | 23     | 16              | 59.0           | 113.7       | 14.0       |
| chrVII@14812to14934   | YGL256W   | ADH4  | gtgatgATGgct   | 123    | -25                | 12    | 19     | 16              | 59.0           | 113.7       | 14.0       |
| chrVII@14843to14866   | YGL256W   | ADH4  | ttagctATGaaa   | 24     | 43                 | 10    | 2      | 16              | 59.0           | 113.7       | 14.0       |
| chrVII@14902to14934   | YGL256W   | ADH4  | tttaatATGtca   | 33     | -25                | 0     | 0      | 16              | 59.0           | 113.7       | 14.0       |
| chrVII@14216to14178   | YGL257C   | MNT2  | attcgcATGagt   | 39     | 22                 | 4     | 19     | 4               | 90.5           | 129.7       | 8.4        |
| chrVII@506934to506957 | YGR007W   | MUQ1  | agacaaATGctt   | 24     | 15                 | 0     | 2      | 0               | 100.1          | 134.3       | 55.5       |
| chrVII@532610to532572 | YGR024C   | THG1  | ttcctaATGcga   | 39     | -27                | 0     | 2      | 1               | 125.2          | 306.0       | 31.4       |
| chrVII@546318to546359 | YGR031W   |       | cagtacATGtgt   | 42     | 85                 | 0     | 3      | 0               | 43.5           | 116.6       | 29.4       |
| chrVII@577485to577493 | YGR041W   | BUD9  | catcctATGgaa   | 9      | -3                 | 0     | 0      | 22              | 38.3           | 29.7        | 16.3       |

Continued on next page

Table S3: All uORFs, continued

| uORF                    | CDS       | Gene  | Initiator Site | Length | uORF end<br>to CDS | # Rib | # mRNA | 5' UTR<br># Rib | 5' UTR<br>mRNA | CDS<br>mRNA | CDS<br>Rib |
|-------------------------|-----------|-------|----------------|--------|--------------------|-------|--------|-----------------|----------------|-------------|------------|
| chrVII@579469to579498   | YGR042W   |       | gatcgcATGaca   | 30     | -19                | 0     | 0      | 0               | 160.2          | 100.9       | 11.6       |
| chrVII@584761to584781   | YGR046W   | TAM41 | gagtagATGttt   | 21     | 117                | 0     | 1      | 9               | 52.4           | 79.4        | 13.3       |
| chrVII@584781to584786   | YGR046W   | TAM41 | taaataATGtga   | 6      | 112                | 0     | 0      | 9               | 52.4           | 79.4        | 13.3       |
| chrVII@591195to591248   | YGR049W   | SCM4  | atataaATGaga   | 54     | 69                 | 11    | 3      | 12              | 12.3           | 18.0        | 41.2       |
| chrVII@605584to605573   | YGR057C   | LST7  | cgataaATGaag   | 12     | 69                 | 1     | 1      | 8               | 28.2           | 87.9        | 7.3        |
| chrVII@605529to605506   | YGR057C   | LST7  | gtttaaATGgtt   | 24     | 2                  | 8     | 2      | 8               | 28.2           | 87.9        | 7.3        |
| chrVII@605522to605514   | YGR057C   | LST7  | tggttgATGaaa   | 9      | 10                 | 1     | 2      | 8               | 28.2           | 87.9        | 7.3        |
| chrVII@605513to604776   | YGR057C   | LST7  | aaatagATGcat   | 738    | -728               | 0     | 0      | 8               | 28.2           | 87.9        | 7.3        |
| chrVII@619971to619948   | YGR065C   | VHT1  | atctgcATGact   | 24     | 87                 | 1     | 2      | 2               | 20.2           | 78.8        | 14.6       |
| chrVII@634092to634063   | YGR071C   |       | tagcatATGtac   | 30     | -3                 | 6     | 1      | 7               | 11.8           | 26.2        | 8.5        |
| chrVII@656950to656982   | YGR089W   | NNF2  | ggatccATGcac   | 33     | -19                | 6     | 0      | 23              | 21.4           | 30.4        | 12.0       |
| chrVII@670341to670352   | YGR093W   |       | gggcttATGgtt   | 12     | 39                 | 4     | 2      | 0               | 95.1           | 93.6        | 23.6       |
| chrVII@687897to687911   | YGR099W   | TEL2  | ttcctcATGaaa   | 15     | -9                 | 0     | 0      | 5               | 80.1           | 53.8        | 8.8        |
| chrVII@698542to698577   | YGR105W   | VMA21 | gctaaaATGaac   | 36     | 25                 | 3     | 25     | 3               | 241.2          | 284.3       | 228.9      |
| chrVII@733063to733031   | YGR121C   | MEP1  | tcgataATGcag   | 33     | 100                | 0     | 3      | 0               | 19.6           | 15.6        | 1.4        |
| chrVII@732992to732972   | YGR121C   | MEP1  | aggcttATGatc   | 21     | 41                 | 0     | 0      | 0               | 19.6           | 15.6        | 1.4        |
| chrVII@746712to746720   | YGR127W   |       | tagtatATGaag   | 9      | 82                 | 0     | 0      | 0               | 8.3            | 18.3        | 7.4        |
| chrVII@788884to788925   | YGR149W   |       | ccctaaATGggt   | 42     | 110                | 1     | 20     | 4               | 54.0           | 45.4        | 10.1       |
| chrVII@796005to796067   | YGR153W   |       | tcgtaaATGgta   | 63     | 29                 | 0     | 7      | 0               | 22.5           | 34.5        | 7.5        |
| chrVII@797924to797895   | YGR154C   | GTO1  | ggagagATGgcc   | 30     | 23                 | 1     | 1      | 1               | 25.9           | 43.9        | 0.2        |
| chrVII@830469to830498   | YGR166W   | KRE11 | ctctatATGgac   | 30     | 21                 | 5     | 1      | 7               | 11.8           | 25.9        | 8.3        |
| chrVII@834511to834491   | YGR168C   |       | gagctaATGaga   | 21     | 5                  | 14    | 6      | 15              | 60.7           | 84.5        | 3.8        |
| chrVII@846535to846543   | YGR174W-A |       | actactATGgtg   | 9      | 116                | 2     | 1      | 3               | 12.3           | 11.3        | 2.3        |
| chrVII@846578to846613   | YGR174W-A |       | actattATGtat   | 36     | 46                 | 0     | 2      | 3               | 12.3           | 11.3        | 2.3        |
| chrVII@903272to903267   | YGR201C   |       | gcctagATGtag   | 6      | 66                 | 0     | 0      | 0               | 18.5           | 49.5        | 2.4        |
| chrVII@904922to904981   | YGR203W   |       | caaacaATGgta   | 60     | 260                | 0     | 2      | 1               | 7.2            | 20.5        | 26.2       |
| chrVII@905012to905023   | YGR203W   |       | aaaagaATGact   | 12     | 218                | 0     | 0      | 1               | 7.2            | 20.5        | 26.2       |
| chrVII@905057to905146   | YGR203W   |       | tcctacATGcaa   | 90     | 95                 | 1     | 6      | 1               | 7.2            | 20.5        | 26.2       |
| chrVII@905079to905189   | YGR203W   |       | cgggtaATGcac   | 111    | 52                 | 1     | 6      | 1               | 7.2            | 20.5        | 26.2       |
| chrVII@910413to910439   | YGR206W   | MVB12 | atagcaATGgga   | 27     | -3                 | 2     | 1      | 2               | 33.4           | 106.6       | 51.5       |
| chrVII@970184to970146   | YGR239C   | PEX21 | ttggcaATGttc   | 39     | 89                 | 0     | 0      | 0               | 9.9            | 31.8        | 12.1       |
| chrVII@995519to995650   | YGR251W   |       | ctagcgATGaga   | 132    | -7                 | 0     | 19     | 0               | 33.1           | 115.8       | 58.8       |
| chrVII@995567to995650   | YGR251W   |       | tataagATGttg   | 84     | -7                 | 0     | 19     | 0               | 33.1           | 115.8       | 58.8       |
| chrVII@1007366to1007340 | YGR257C   | MTM1  | aatcgtATGagc   | 27     | 30                 | 5     | 9      | 5               | 83.7           | 93.9        | 8.8        |
| chrVII@1025951to1025907 | YGR267C   | FOL2  | attttaATGctc   | 45     | 167                | 2     | 4      | 12              | 194.2          | 319.8       | 130.3      |
| chrVII@1025932to1025825 | YGR267C   | FOL2  | tcaaacATGtct   | 108    | 85                 | 4     | 83     | 12              | 194.2          | 319.8       | 130.3      |
| chrVII@1026920to1026967 | YGR270W   | YTA7  | gaggaaATGgca   | 48     | 408                | 1     | 0      | 7               | 6.7            | 20.2        | 15.8       |
| chrVII@1026974to1027012 | YGR270W   | YTA7  | aagttaATGctg   | 39     | 363                | 0     | 0      | 7               | 6.7            | 20.2        | 15.8       |
| chrVII@1026988to1026996 | YGR270W   | YTA7  | tttgagATGttt   | 9      | 379                | 0     | 0      | 7               | 6.7            | 20.2        | 15.8       |
| chrVII@1027159to1027242 | YGR270W   | YTA7  | acggccATGtgt   | 84     | 133                | 0     | 1      | 7               | 6.7            | 20.2        | 15.8       |
| chrVII@1065184to1065077 | YGR286C   | BIO2  | gagacgATGcct   | 108    | 131                | 2     | 13     | 2               | 50.7           | 157.2       | 39.6       |
| chrVII@1065134to1065129 | YGR286C   | BIO2  | caggctATGtag   | 6      | 183                | 0     | 0      | 2               | 50.7           | 157.2       | 39.6       |
| chrVII@1070255to1070302 | YGR288W   | MAL13 | aagtaaATGaaa   | 48     | -3                 | 4     | 2      | 4               | 5.7            | 19.3        | 2.2        |
| chrVIII@94551to94540    | YHL008C   |       | tatttcATGgaa   | 12     | 35                 | 0     | 4      | 0               | 25.8           | 16.9        | 6.3        |
| chrVIII@54243to54235    | YHL026C   |       | ttcaagATGtta   | 9      | 72                 | 1     | 0      | 2               | 23.7           | 21.9        | 2.8        |
| chrVIII@54202to54185    | YHL026C   |       | atatatATGcat   | 18     | 22                 | 1     | 2      | 2               | 23.7           | 21.9        | 2.8        |

Continued on next page

Table S3: All uORFs, continued

| uORF                   | CDS       | Gene    | Initiator Site | Length | uORF end to CDS | # Rib | # mRNA | 5' UTR # Rib | 5' UTR mRNA | CDS mRNA | CDS Rib |
|------------------------|-----------|---------|----------------|--------|-----------------|-------|--------|--------------|-------------|----------|---------|
| chrVIII@151536to151628 | YHR023W   | MYO1    | ttgtttATGacc   | 93     | 30              | 0     | 6      | 0            | 7.7         | 19.5     | 18.3    |
| chrVIII@195404to195448 | YHR045W   |         | cattgaATGgaa   | 45     | 95              | 1     | 13     | 2            | 103.3       | 122.5    | 16.8    |
| chrVIII@195536to195631 | YHR045W   |         | aagttgATGgac   | 96     | -88             | 0     | 0      | 2            | 103.3       | 122.5    | 16.8    |
| chrVIII@198323to198267 | YHR046C   | INM1    | ttttggATGaat   | 57     | -10             | 2     | 9      | 2            | 132.4       | 113.2    | 39.2    |
| chrVIII@239037to239057 | YHR072W   | ERG7    | ccagtaATGtac   | 21     | 42              | 1     | 5      | 1            | 35.9        | 104.5    | 16.8    |
| chrVIII@266990to266973 | YHR080C   |         | ggttgaATGatt   | 18     | 134             | 0     | 2      | 0            | 9.5         | 15.2     | 1.4     |
| chrVIII@266865to266839 | YHR080C   |         | ctctccATGgat   | 27     | 0               | 0     | 0      | 0            | 9.5         | 15.2     | 1.4     |
| chrVIII@325498to325518 | YHR106W   | TRR2    | cactcgATGggg   | 21     | 82              | 0     | 3      | 0            | 21.9        | 60.2     | 9.2     |
| chrVIII@325505to325513 | YHR106W   | TRR2    | tggggaATGcct   | 9      | 87              | 0     | 2      | 0            | 21.9        | 60.2     | 9.2     |
| chrVIII@325524to325592 | YHR106W   | TRR2    | accgcaATGaaa   | 69     | 8               | 0     | 9      | 0            | 21.9        | 60.2     | 9.2     |
| chrVIII@335716to335708 | YHR112C   |         | cttcaaATGttg   | 9      | 43              | 0     | 0      | 2            | 16.7        | 37.5     | 21.4    |
| chrVIII@335704to335696 | YHR112C   |         | tagtacATGcta   | 9      | 31              | 2     | 2      | 2            | 16.7        | 37.5     | 21.4    |
| chrVIII@364203to364171 | YHR129C   | ARP1    | gagtaATGcta    | 33     | 16              | 21    | 5      | 22           | 12.3        | 35.5     | 8.4     |
| chrVIII@364197to364171 | YHR129C   | ARP1    | atgctaATGcta   | 27     | 16              | 18    | 1      | 22           | 12.3        | 35.5     | 8.4     |
| chrVIII@374392to374378 | YHR135C   | YCK1    | gttttcATGtgg   | 15     | 66              | 2     | 1      | 4            | 29.5        | 58.6     | 68.5    |
| chrVIII@374386to374378 | YHR135C   | YCK1    | atgtggATGcca   | 9      | 66              | 1     | 0      | 4            | 29.5        | 58.6     | 68.5    |
| chrVIII@375549to375575 | YHR137W   | ARO9    | ttgccgATGcct   | 27     | 136             | 0     | 4      | 0            | 64.9        | 259.4    | 50.1    |
| chrVIII@388756to388745 | YHR144C   | DCD1    | gtgtgaATGcta   | 12     | 17              | 0     | 0      | 0            | 94.9        | 108.8    | 31.1    |
| chrVIII@422599to422543 | YHR161C   | YAP1801 | aagaatATGatg   | 57     | 255             | 0     | 3      | 0            | 24.5        | 58.7     | 13.7    |
| chrVIII@422596to422543 | YHR161C   | YAP1801 | aatatgATGata   | 54     | 255             | 0     | 2      | 0            | 24.5        | 58.7     | 13.7    |
| chrVIII@422478to422458 | YHR161C   | YAP1801 | agcggtATGgta   | 21     | 170             | 0     | 4      | 0            | 24.5        | 58.7     | 13.7    |
| chrVIII@422473to422399 | YHR161C   | YAP1801 | tatggtATGcac   | 75     | 111             | 0     | 12     | 0            | 24.5        | 58.7     | 13.7    |
| chrVIII@422467to422399 | YHR161C   | YAP1801 | atgcacATGgtg   | 69     | 111             | 0     | 11     | 0            | 24.5        | 58.7     | 13.7    |
| chrVIII@422458to422399 | YHR161C   | YAP1801 | gtgttgATGcct   | 60     | 111             | 0     | 9      | 0            | 24.5        | 58.7     | 13.7    |
| chrVIII@480747to480721 | YHR186C   | KOG1    | tttccaATGcat   | 27     | 50              | 4     | 0      | 6            | 11.1        | 12.8     | 8.5     |
| chrVIII@480697to480671 | YHR186C   | KOG1    | tattgcATGcag   | 27     | 0               | 2     | 2      | 6            | 11.1        | 12.8     | 8.5     |
| chrVIII@506113to506142 | YHR204W   | MNL1    | ctcaccATGggt   | 30     | 176             | 0     | 0      | 8            | 17.9        | 64.5     | 5.3     |
| chrVIII@506246to506254 | YHR204W   | MNL1    | ttgaatATGtat   | 9      | 64              | 0     | 1      | 8            | 17.9        | 64.5     | 5.3     |
| chrVIII@506254to506268 | YHR204W   | MNL1    | gtattaATGggt   | 15     | 50              | 0     | 0      | 8            | 17.9        | 64.5     | 5.3     |
| chrVIII@506271to506345 | YHR204W   | MNL1    | gtaaccATGata   | 75     | -27             | 8     | 9      | 8            | 17.9        | 64.5     | 5.3     |
| chrVIII@506290to506316 | YHR204W   | MNL1    | atttccATGgat   | 27     | 2               | 8     | 5      | 8            | 17.9        | 64.5     | 5.3     |
| chrVIII@512435to512440 | YHR206W   | SKN7    | catcgaATGtga   | 6      | 291             | 0     | 0      | 12           | 17.0        | 22.1     | 33.5    |
| chrVIII@519421to520311 | YHR209W   |         | ctgtcaATGgaa   | 891    | -875            | 0     | 1      | 0            | 23.7        | 27.8     | 8.7     |
| chrIX@326039to326083   | YIL014W   | MNT3    | catcacATGagt   | 45     | 17              | 6     | 11     | 6            | 50.8        | 98.7     | 13.3    |
| chrIX@315068to315085   | YIL019W   | FAF1    | gtacaaATGacc   | 18     | 5               | 3     | 6      | 3            | 83.4        | 148.2    | 58.3    |
| chrIX@301347to301321   | YIL029C   |         | gcagttATGcaa   | 27     | 67              | 13    | 15     | 16           | 66.8        | 72.0     | 0.5     |
| chrIX@301324to301301   | YIL029C   |         | gggcaaATGaac   | 24     | 47              | 2     | 13     | 16           | 66.8        | 72.0     | 0.5     |
| chrIX@301298to301278   | YIL029C   |         | gtaaggATGctg   | 21     | 24              | 1     | 2      | 16           | 66.8        | 72.0     | 0.5     |
| chrIX@282667to282587   | YIL038C   | NOT3    | cattgtATGttt   | 81     | -63             | 3     | 2      | 32           | 42.4        | 47.0     | 51.9    |
| chrIX@258591to258623   | YIL050W   | PCL7    | tataacATGgac   | 33     | 288             | 0     | 3      | 4            | 22.3        | 53.1     | 33.6    |
| chrIX@258631to258639   | YIL050W   | PCL7    | catactATGgct   | 9      | 272             | 0     | 1      | 4            | 22.3        | 53.1     | 33.6    |
| chrIX@258709to258744   | YIL050W   | PCL7    | cttgcgATGggt   | 36     | 167             | 1     | 2      | 4            | 22.3        | 53.1     | 33.6    |
| chrIX@254107to254078   | YIL055C   |         | gtcgtatATGttg  | 30     | 156             | 0     | 1      | 0            | 3.9         | 9.6      | 3.1     |
| chrIX@187689to187672   | YIL094C   | LYS12   | gtatctATGcga   | 18     | 44              | 9     | 22     | 2            | 233.7       | 368.3    | 155.1   |
| chrIX@173653to173642   | YIL102C-A |         | ctctaaATGcaa   | 12     | 54              | 1     | 0      | 3            | 18.5        | 42.7     | 15.2    |
| chrIX@173634to173629   | YIL102C-A |         | tcaaaaATGtga   | 6      | 41              | 2     | 0      | 3            | 18.5        | 42.7     | 15.2    |

Continued on next page

Table S3: All uORFs, continued

| uORF                 | CDS       | Gene  | Initiator Site | Length | uORF end<br>to CDS | # Rib | # mRNA | 5' UTR<br># Rib | 5' UTR<br>mRNA | CDS<br>mRNA | CDS<br>Rib |
|----------------------|-----------|-------|----------------|--------|--------------------|-------|--------|-----------------|----------------|-------------|------------|
| chrIX@137975to137943 | YIL119C   | RPI1  | cagttcATGgta   | 33     | 70                 | 10    | 7      | 10              | 56.1           | 34.1        | 37.8       |
| chrIX@113447to113388 | YIL129C   | TAO3  | atcgttATGggt   | 60     | 152                | 0     | 0      | 0               | 4.7            | 13.1        | 8.3        |
| chrIX@113363to113325 | YIL129C   | TAO3  | aggcaaATGgaa   | 39     | 89                 | 0     | 1      | 0               | 4.7            | 13.1        | 8.3        |
| chrIX@113346to113335 | YIL129C   | TAO3  | aagcaaATGtgg   | 12     | 99                 | 0     | 0      | 0               | 4.7            | 13.1        | 8.3        |
| chrIX@96459to96307   | YIL135C   | VHS2  | ggtgatATGcaa   | 153    | -67                | 4     | 8      | 4               | 25.0           | 38.9        | 31.1       |
| chrIX@37262to37375   | YIL162W   | SUC2  | atagatATGtat   | 114    | 9                  | 0     | 7      | 0               | 8.9            | 18.5        | 30.9       |
| chrIX@37381to38982   | YIL162W   | SUC2  | acgtatATGatg   | 1602   | -1598              | 0     | 0      | 0               | 8.9            | 18.5        | 30.9       |
| chrIX@380920to380891 | YIR013C   | GAT4  | actagaATGctc   | 30     | 511                | 0     | 0      | 2               | 7.9            | 1.6         | 0.0        |
| chrIX@380902to380891 | YIR013C   | GAT4  | gtacccATGatg   | 12     | 511                | 0     | 0      | 2               | 7.9            | 1.6         | 0.0        |
| chrIX@380899to380891 | YIR013C   | GAT4  | cccatgATGcat   | 9      | 511                | 0     | 0      | 2               | 7.9            | 1.6         | 0.0        |
| chrIX@380851to380813 | YIR013C   | GAT4  | cgaattATGgct   | 39     | 433                | 0     | 0      | 2               | 7.9            | 1.6         | 0.0        |
| chrIX@380830to380813 | YIR013C   | GAT4  | attgcgATGaca   | 18     | 433                | 0     | 0      | 2               | 7.9            | 1.6         | 0.0        |
| chrIX@380816to380790 | YIR013C   | GAT4  | gtcaatATGaaa   | 27     | 410                | 0     | 0      | 2               | 7.9            | 1.6         | 0.0        |
| chrIX@380776to380735 | YIR013C   | GAT4  | ccacctATGccc   | 42     | 355                | 0     | 1      | 2               | 7.9            | 1.6         | 0.0        |
| chrIX@380760to380728 | YIR013C   | GAT4  | ttgaaaATGgta   | 33     | 348                | 0     | 1      | 2               | 7.9            | 1.6         | 0.0        |
| chrIX@380558to380499 | YIR013C   | GAT4  | acatccATGtgt   | 60     | 119                | 0     | 2      | 2               | 7.9            | 1.6         | 0.0        |
| chrIX@380537to380499 | YIR013C   | GAT4  | tgtgccATGgaa   | 39     | 119                | 0     | 2      | 2               | 7.9            | 1.6         | 0.0        |
| chrIX@380512to380474 | YIR013C   | GAT4  | ttcatCATGaat   | 39     | 94                 | 0     | 1      | 2               | 7.9            | 1.6         | 0.0        |
| chrIX@380479to380474 | YIR013C   | GAT4  | tttcacATGtaa   | 6      | 94                 | 0     | 0      | 2               | 7.9            | 1.6         | 0.0        |
| chrIX@414708to414679 | YIR031C   | DAL7  | tagagtATGtgt   | 30     | 4                  | 0     | 14     | 2               | 91.7           | 107.2       | 1.2        |
| chrX@405248to405283  | YJL016W   |       | agctgaATGaaa   | 36     | 299                | 0     | 1      | 0               | 18.8           | 27.1        | 6.0        |
| chrX@359678to359667  | YJL044C   | GYP6  | tcgcttATGcaa   | 12     | -3                 | 0     | 1      | 1               | 117.4          | 92.2        | 21.8       |
| chrX@352369to352389  | YJL046W   |       | tcittgATGttt   | 21     | -9                 | 5     | 10     | 0               | 66.8           | 58.8        | 6.5        |
| chrX@348775to348710  | YJL048C   | UBX6  | ttccacATGaat   | 66     | 79                 | 0     | 22     | 2               | 76.0           | 60.9        | 7.8        |
| chrX@348725to348594  | YJL048C   | UBX6  | atatatATGcac   | 132    | -37                | 2     | 31     | 2               | 76.0           | 60.9        | 7.8        |
| chrX@254489to254421  | YJL094C   | KHA1  | catcaaATGata   | 69     | -15                | 3     | 5      | 3               | 25.0           | 33.0        | 8.0        |
| chrX@192418to192435  | YJL117W   | PHO86 | cttttcATGttt   | 18     | 94                 | 0     | 1      | 0               | 118.9          | 345.2       | 139.8      |
| chrX@191141to1911103 | YJL121C   | RPE1  | aatttcATGcaa   | 39     | 15                 | 0     | 4      | 0               | 23.8           | 75.5        | 198.4      |
| chrX@184300to184265  | YJL127C   | SPT10 | cgggggATGagt   | 36     | 48                 | 0     | 1      | 6               | 20.8           | 23.3        | 8.1        |
| chrX@181831to181781  | YJL127C-B |       | agttaaATGtac   | 51     | 75                 | 0     | 15     | 0               | 162.3          | 307.3       | 67.9       |
| chrX@172746to172714  | YJL130C   | URA2  | ttgagtATGttt   | 33     | 351                | 2     | 2      | 118             | 24.0           | 40.6        | 202.7      |
| chrX@172737to172714  | YJL130C   | URA2  | ttttttATGatt   | 24     | 351                | 1     | 2      | 118             | 24.0           | 40.6        | 202.7      |
| chrX@172714to172634  | YJL130C   | URA2  | gccttaATGttg   | 81     | 271                | 0     | 4      | 118             | 24.0           | 40.6        | 202.7      |
| chrX@172693to172634  | YJL130C   | URA2  | cagaccATGcga   | 60     | 271                | 0     | 3      | 118             | 24.0           | 40.6        | 202.7      |
| chrX@172688to172623  | YJL130C   | URA2  | catgcgATGcca   | 66     | 260                | 0     | 3      | 118             | 24.0           | 40.6        | 202.7      |
| chrX@172615to172541  | YJL130C   | URA2  | tctgcgATGatg   | 75     | 178                | 0     | 3      | 118             | 24.0           | 40.6        | 202.7      |
| chrX@172612to172541  | YJL130C   | URA2  | gcgatgATGtcg   | 72     | 178                | 0     | 3      | 118             | 24.0           | 40.6        | 202.7      |
| chrX@172529to172497  | YJL130C   | URA2  | atcttcATGgca   | 33     | 134                | 2     | 0      | 118             | 24.0           | 40.6        | 202.7      |
| chrX@159899to159840  | YJL133C-A |       | gttttaATGatt   | 60     | -3                 | 2     | 15     | 2               | 81.1           | 172.9       | 123.5      |
| chrX@160592to160600  | YJL133W   | MRS3  | atatttATGtta   | 9      | 15                 | 8     | 3      | 15              | 49.1           | 110.8       | 20.5       |
| chrX@153049to153023  | YJL139C   | YUR1  | aatctaATGctt   | 27     | 28                 | 16    | 3      | 0               | 36.9           | 44.9        | 8.0        |
| chrX@150404to150393  | YJL141C   | YAK1  | ttcacATGcta    | 12     | 7                  | 1     | 1      | 4               | 13.7           | 24.2        | 10.2       |
| chrX@128982to128962  | YJL156C   | SSY5  | ttttgcATGtac   | 21     | 14                 | 3     | 5      | 3               | 37.7           | 39.4        | 15.0       |
| chrX@117194to117208  | YJL161W   |       | aacttgATGcaa   | 15     | 32                 | 0     | 0      | 0               | 13.4           | 16.2        | 4.2        |
| chrX@115650to115612  | YJL162C   | JJJ2  | cagtttATGcta   | 39     | -12                | 4     | 7      | 5               | 45.9           | 48.3        | 7.6        |
| chrX@111194to111180  | YJL164C   | TPK1  | cagtgcATGaat   | 15     | 28                 | 3     | 0      | 14              | 22.0           | 27.1        | 17.4       |

Continued on next page

Table S3: All uORFs, continued

| uORF                 | CDS     | Gene   | Initiator Site | Length | uORF end to CDS | # Rib | # mRNA | 5' UTR # Rib | 5' UTR mRNA | CDS mRNA | CDS Rib |
|----------------------|---------|--------|----------------|--------|-----------------|-------|--------|--------------|-------------|----------|---------|
| chrX@50489to50415    | YJL205C | NCE101 | atacaaATGttc   | 75     | -27             | 2     | 3      | 2            | 22.9        | 78.7     | 45.5    |
| chrX@37999to38049    | YJL209W | CBP1   | ctttccATGcaa   | 51     | -45             | 0     | 0      | 0            | 41.8        | 34.8     | 3.9     |
| chrX@32049to32105    | YJL213W |        | ccgttgATGga    | 57     | 57              | 1     | 52     | 1            | 109.5       | 115.0    | 0.2     |
| chrX@32088to32105    | YJL213W |        | gtaagtATGtca   | 18     | 57              | 0     | 29     | 1            | 109.5       | 115.0    | 0.2     |
| chrX@32115to32153    | YJL213W |        | acagtcATGtcc   | 39     | 9               | 0     | 5      | 1            | 109.5       | 115.0    | 0.2     |
| chrX@452283to452288  | YJR008W |        | ccactcATGtga   | 6      | 134             | 0     | 2      | 8            | 22.3        | 32.4     | 1.6     |
| chrX@452309to452359  | YJR008W |        | gataacATGcgg   | 51     | 63              | 8     | 9      | 8            | 22.3        | 32.4     | 1.6     |
| chrX@507701to507784  | YJR040W | GEF1   | cggtgaATGttg   | 84     | -46             | 3     | 2      | 2            | 37.1        | 36.7     | 15.0    |
| chrX@535876to535923  | YJR054W |        | aaagaaATGttg   | 48     | 125             | 0     | 3      | 6            | 33.6        | 97.1     | 7.4     |
| chrX@535898to535969  | YJR054W |        | gaatagATGttt   | 72     | 79              | 3     | 9      | 6            | 33.6        | 97.1     | 7.4     |
| chrX@535907to535969  | YJR054W |        | tttcaaATGaaa   | 63     | 79              | 3     | 8      | 6            | 33.6        | 97.1     | 7.4     |
| chrX@535920to536024  | YJR054W |        | tagaccATGagg   | 105    | 24              | 6     | 18     | 6            | 33.6        | 97.1     | 7.4     |
| chrX@535959to536024  | YJR054W |        | cccttgATGatt   | 66     | 24              | 6     | 14     | 6            | 33.6        | 97.1     | 7.4     |
| chrX@535981to536016  | YJR054W |        | atctttATGgtt   | 36     | 32              | 2     | 9      | 6            | 33.6        | 97.1     | 7.4     |
| chrX@536013to536024  | YJR054W |        | aatttcATGaat   | 12     | 24              | 1     | 2      | 6            | 33.6        | 97.1     | 7.4     |
| chrX@587702to587725  | YJR089W | BIR1   | tacctcATGgga   | 24     | -15             | 0     | 0      | 0            | 20.8        | 25.0     | 7.9     |
| chrX@617383to617354  | YJR100C |        | tacgaaATGaaa   | 30     | 28              | 2     | 5      | 2            | 30.5        | 110.5    | 15.3    |
| chrX@649693to649740  | YJR122W | IBA57  | tattagATGcgc   | 48     | 29              | 3     | 2      | 2            | 17.9        | 36.1     | 5.7     |
| chrX@667194to667120  | YJR130C | STR2   | agtagaATGacg   | 75     | -10             | 3     | 7      | 2            | 16.7        | 54.4     | 5.6     |
| chrX@667185to667120  | YJR130C | STR2   | acgctcATGtgc   | 66     | -10             | 2     | 7      | 2            | 16.7        | 54.4     | 5.6     |
| chrX@695888to695899  | YJR141W |        | aaacaaATGcaa   | 12     | 0               | 3     | 1      | 4            | 89.0        | 128.5    | 6.9     |
| chrX@719524to719532  | YJR152W | DAL5   | gattggATGga    | 9      | 127             | 0     | 0      | 1            | 14.7        | 18.5     | 0.0     |
| chrX@719536to719580  | YJR152W | DAL5   | taataATGtat    | 45     | 79              | 0     | 1      | 1            | 14.7        | 18.5     | 0.0     |
| chrX@719546to719593  | YJR152W | DAL5   | ataataATGgac   | 48     | 66              | 1     | 2      | 1            | 14.7        | 18.5     | 0.0     |
| chrX@719577to719630  | YJR152W | DAL5   | gagatcATGagg   | 54     | 29              | 1     | 6      | 1            | 14.7        | 18.5     | 0.0     |
| chrX@727054to727089  | YJR155W | AAD10  | cccaatATGatt   | 36     | 309             | 1     | 5      | 1            | 37.6        | 36.9     | 0.5     |
| chrX@727120to727179  | YJR155W | AAD10  | cccaaaATGtgc   | 60     | 219             | 0     | 15     | 1            | 37.6        | 36.9     | 0.5     |
| chrX@727134to727364  | YJR155W | AAD10  | ttcgaaATGtct   | 231    | 34              | 0     | 47     | 1            | 37.6        | 36.9     | 0.5     |
| chrX@727242to727364  | YJR155W | AAD10  | ggaggtATGtct   | 123    | 34              | 0     | 27     | 1            | 37.6        | 36.9     | 0.5     |
| chrX@727272to727364  | YJR155W | AAD10  | ggattcATGgga   | 93     | 34              | 0     | 24     | 1            | 37.6        | 36.9     | 0.5     |
| chrX@727281to727364  | YJR155W | AAD10  | ggatcaATGgac   | 84     | 34              | 0     | 19     | 1            | 37.6        | 36.9     | 0.5     |
| chrX@727312to727431  | YJR155W | AAD10  | tacttgATGctt   | 120    | -33             | 0     | 19     | 1            | 37.6        | 36.9     | 0.5     |
| chrX@727366to727431  | YJR155W | AAD10  | attagtATGagc   | 66     | -33             | 0     | 7      | 1            | 37.6        | 36.9     | 0.5     |
| chrX@727394to727420  | YJR155W | AAD10  | cggtgaATGgat   | 27     | -22             | 0     | 0      | 1            | 37.6        | 36.9     | 0.5     |
| chrXI@434634to434605 | YKL005C | BYE1   | cttgcaATGaaa   | 30     | 86              | 3     | 6      | 1            | 102.0       | 50.2     | 15.6    |
| chrXI@402164to402238 | YKL019W | RAM2   | ttaattATGgta   | 75     | -28             | 5     | 9      | 10           | 71.8        | 79.2     | 24.7    |
| chrXI@393318to393329 | YKL023W |        | tatacaATGcaa   | 12     | 34              | 0     | 0      | 0            | 5.9         | 20.8     | 27.1    |
| chrXI@389671to389651 | YKL026C | GPX1   | ttgcttATGgtg   | 21     | 126             | 0     | 0      | 5            | 7.6         | 22.6     | 5.3     |
| chrXI@389635to389609 | YKL026C | GPX1   | acagtaATGtac   | 27     | 84              | 2     | 1      | 5            | 7.6         | 22.6     | 5.3     |
| chrXI@389614to389609 | YKL026C | GPX1   | ttagtcATGtag   | 6      | 84              | 0     | 0      | 5            | 7.6         | 22.6     | 5.3     |
| chrXI@359639to359668 | YKL041W | VPS24  | aaaaatATGcta   | 30     | 117             | 0     | 0      | 9            | 53.8        | 130.2    | 59.7    |
| chrXI@359687to359740 | YKL041W | VPS24  | atatacATGtat   | 54     | 45              | 9     | 20     | 9            | 53.8        | 130.2    | 59.7    |
| chrXI@334666to334631 | YKL056C | TMA19  | tggttaATGttt   | 36     | 73              | 5     | 18     | 6            | 1645.3      | 6368.8   | 4929.3  |
| chrXI@334653to334582 | YKL056C | TMA19  | cattcaATGgtt   | 72     | 24              | 5     | 234    | 6            | 1645.3      | 6368.8   | 4929.3  |
| chrXI@317183to317188 | YKL064W | MNR2   | tttgatATGtga   | 6      | 219             | 1     | 1      | 16           | 36.3        | 25.9     | 13.8    |
| chrXI@317306to317335 | YKL064W | MNR2   | catttgATGact   | 30     | 72              | 14    | 6      | 16           | 36.3        | 25.9     | 13.8    |

Continued on next page



Table S3: All uORFs, continued

| uORF                 | CDS     | Gene  | Initiator Site | Length | uORF end<br>to CDS | # Rib | # mRNA | 5' UTR<br># Rib | 5' UTR<br>mRNA | CDS<br>mRNA | CDS<br>Rib |
|----------------------|---------|-------|----------------|--------|--------------------|-------|--------|-----------------|----------------|-------------|------------|
| chrXI@305719to305739 | YKL070W |       | tctattATGtcc   | 21     | 115                | 0     | 0      | 0               | 1.3            | 1.2         | 0.0        |
| chrXI@305741to305761 | YKL070W |       | attaggATGgta   | 21     | 93                 | 0     | 1      | 0               | 1.3            | 1.2         | 0.0        |
| chrXI@231621to231650 | YKL109W | HAP4  | tcgtatATGcta   | 30     | 220                | 4     | 0      | 12              | 2.6            | 9.9         | 12.5       |
| chrXI@231809to231820 | YKL109W | HAP4  | attttaATGggt   | 12     | 50                 | 8     | 1      | 12              | 2.6            | 9.9         | 12.5       |
| chrXI@229645to229619 | YKL110C | KTI12 | atcgcgATGgaa   | 27     | 96                 | 0     | 1      | 4               | 46.3           | 122.0       | 32.1       |
| chrXI@229633to229619 | YKL110C | KTI12 | aaagaaATGaag   | 15     | 96                 | 0     | 1      | 4               | 46.3           | 122.0       | 32.1       |
| chrXI@229619to229608 | YKL110C | KTI12 | tacttgATGaac   | 12     | 85                 | 0     | 2      | 4               | 46.3           | 122.0       | 32.1       |
| chrXI@229584to229531 | YKL110C | KTI12 | atcagaATGagg   | 54     | 8                  | 2     | 19     | 4               | 46.3           | 122.0       | 32.1       |
| chrXI@193093to193070 | YKL133C |       | attgtaATGaag   | 24     | 2                  | 5     | 2      | 5               | 8.0            | 21.4        | 2.1        |
| chrXI@193081to193070 | YKL133C |       | aaatttATGctc   | 12     | 2                  | 2     | 1      | 5               | 8.0            | 21.4        | 2.1        |
| chrXI@166418to166450 | YKL150W | MCR1  | ataagaATGcag   | 33     | 98                 | 0     | 0      | 2               | 31.1           | 101.3       | 53.2       |
| chrXI@166434to166478 | YKL150W | MCR1  | ctcgcaATGccc   | 45     | 70                 | 0     | 3      | 2               | 31.1           | 101.3       | 53.2       |
| chrXI@166150to166091 | YKL151C |       | ctagaaATGgac   | 60     | 157                | 4     | 6      | 4               | 26.0           | 70.4        | 23.9       |
| chrXI@166140to166072 | YKL151C |       | actcttATGatc   | 69     | 138                | 2     | 5      | 4               | 26.0           | 70.4        | 23.9       |
| chrXI@166072to166067 | YKL151C |       | ggagtgATGtga   | 6      | 133                | 0     | 1      | 4               | 26.0           | 70.4        | 23.9       |
| chrXI@166067to166062 | YKL151C |       | gatgtgATGtga   | 6      | 128                | 0     | 1      | 4               | 26.0           | 70.4        | 23.9       |
| chrXI@166062to166030 | YKL151C |       | gatgtgATGcga   | 33     | 96                 | 0     | 5      | 4               | 26.0           | 70.4        | 23.9       |
| chrXI@166057to166052 | YKL151C |       | gatcgATGtga    | 6      | 118                | 0     | 0      | 4               | 26.0           | 70.4        | 23.9       |
| chrXI@166052to166035 | YKL151C |       | gatgtgATGggt   | 18     | 101                | 0     | 3      | 4               | 26.0           | 70.4        | 23.9       |
| chrXI@166020to166015 | YKL151C |       | atatatATGtaa   | 6      | 81                 | 0     | 0      | 4               | 26.0           | 70.4        | 23.9       |
| chrXI@150909to150835 | YKL161C |       | tcgacaATGacg   | 75     | 144                | 0     | 8      | 3               | 26.5           | 23.2        | 0.3        |
| chrXI@150893to150846 | YKL161C |       | tttcagATGggt   | 48     | 155                | 0     | 6      | 3               | 26.5           | 23.2        | 0.3        |
| chrXI@150849to150835 | YKL161C |       | acttttATGatg   | 15     | 144                | 0     | 0      | 3               | 26.5           | 23.2        | 0.3        |
| chrXI@150846to150835 | YKL161C |       | tttatgATGtta   | 12     | 144                | 0     | 0      | 3               | 26.5           | 23.2        | 0.3        |
| chrXI@150818to150813 | YKL161C |       | tatttaATGtaa   | 6      | 122                | 1     | 0      | 3               | 26.5           | 23.2        | 0.3        |
| chrXI@150788to150762 | YKL161C |       | gactggATGaaa   | 27     | 71                 | 2     | 2      | 3               | 26.5           | 23.2        | 0.3        |
| chrXI@150773to150762 | YKL161C |       | gacaaaATGgaa   | 12     | 71                 | 0     | 0      | 3               | 26.5           | 23.2        | 0.3        |
| chrXI@127371to127403 | YKL171W |       | ggtcctATGttc   | 33     | 76                 | 0     | 0      | 4               | 7.7            | 8.0         | 2.3        |
| chrXI@118209to118201 | YKL176C | LST4  | tagtggATGggt   | 9      | 211                | 0     | 0      | 8               | 47.8           | 53.7        | 6.0        |
| chrXI@100534to100554 | YKL182W | FAS1  | tcttatATGctc   | 21     | 121                | 187   | 6      | 302             | 76.2           | 86.3        | 345.0      |
| chrXI@70325to70314   | YKL198C | PTK1  | acctccATGtat   | 12     | 92                 | 4     | 0      | 3               | 4.1            | 12.8        | 4.5        |
| chrXI@11525to11469   | YKL220C | FRE2  | ggctcaATGatg   | 57     | 243                | 2     | 0      | 2               | 15.6           | 8.9         | 0.1        |
| chrXI@11522to11469   | YKL220C | FRE2  | tcaatgATGcta   | 54     | 243                | 2     | 0      | 2               | 15.6           | 8.9         | 0.1        |
| chrXI@11492to11469   | YKL220C | FRE2  | gaaaatATGggt   | 24     | 243                | 0     | 0      | 2               | 15.6           | 8.9         | 0.1        |
| chrXI@11392to11354   | YKL220C | FRE2  | tttctgATGaac   | 39     | 128                | 0     | 6      | 2               | 15.6           | 8.9         | 0.1        |
| chrXI@11298to11242   | YKL220C | FRE2  | caaaaaATGaac   | 57     | 16                 | 0     | 5      | 2               | 15.6           | 8.9         | 0.1        |
| chrXI@11292to11242   | YKL220C | FRE2  | atgaacATGatt   | 51     | 16                 | 0     | 5      | 2               | 15.6           | 8.9         | 0.1        |
| chrXI@11245to11141   | YKL220C | FRE2  | aagcttATGaaa   | 105    | -85                | 0     | 0      | 2               | 15.6           | 8.9         | 0.1        |
| chrXI@444961to445011 | YKR003W | OSH6  | agttacATGaag   | 51     | 12                 | 4     | 11     | 4               | 45.1           | 49.6        | 31.9       |
| chrXI@444976to445011 | YKR003W | OSH6  | gagttcATGcaa   | 36     | 12                 | 3     | 4      | 4               | 45.1           | 49.6        | 31.9       |
| chrXI@473140to473132 | YKR017C |       | tgaagaATGctg   | 9      | 141                | 0     | 1      | 0               | 31.7           | 46.9        | 4.5        |
| chrXI@478868to478909 | YKR021W | ALY1  | tcctctATGact   | 42     | -33                | 0     | 0      | 1               | 6.9            | 14.2        | 6.3        |
| chrXI@482804to482796 | YKR022C | NTR2  | ctagcaATGtta   | 9      | 15                 | 1     | 2      | 1               | 100.1          | 91.2        | 12.7       |
| chrXI@490902to490964 | YKR027W | BCH2  | aacaaaATGaca   | 63     | 42                 | 3     | 5      | 3               | 16.8           | 39.7        | 6.9        |
| chrXI@527368to527382 | YKR050W | TRK2  | agagaaATGata   | 15     | 74                 | 0     | 0      | 0               | 6.1            | 7.3         | 0.2        |
| chrXI@527394to527549 | YKR050W | TRK2  | tttcagATGatg   | 156    | -93                | 0     | 2      | 0               | 6.1            | 7.3         | 0.2        |

Continued on next page

Table S3: All uORFs, continued

| uORF                  | CDS     | Gene  | Initiator Site | Length | uORF end<br>to CDS | # Rib | # mRNA | 5' UTR<br># Rib | 5' UTR<br>mRNA | CDS<br>mRNA | CDS<br>Rib |
|-----------------------|---------|-------|----------------|--------|--------------------|-------|--------|-----------------|----------------|-------------|------------|
| chrXI@527397to527549  | YKR050W | TRK2  | cagatgATGaga   | 153    | -93                | 0     | 2      | 0               | 6.1            | 7.3         | 0.2        |
| chrXI@552264to552287  | YKR058W | GLG1  | ctatatATGtccg  | 24     | 124                | 0     | 1      | 5               | 11.4           | 15.6        | 1.0        |
| chrXI@552300to552335  | YKR058W | GLG1  | ctgaaaATGttt   | 36     | 76                 | 4     | 3      | 5               | 11.4           | 15.6        | 1.0        |
| chrXI@552320to552400  | YKR058W | GLG1  | taagctATGcct   | 81     | 11                 | 3     | 4      | 5               | 11.4           | 15.6        | 1.0        |
| chrXI@552405to554261  | YKR058W | GLG1  | agtgtgATGgga   | 1857   | -1850              | 0     | 0      | 5               | 11.4           | 15.6        | 1.0        |
| chrXI@561957to561898  | YKR063C | LAS1  | aaagcaATGaaa   | 60     | -40                | 0     | 0      | 0               | 25.0           | 64.3        | 10.2       |
| chrXI@608023to608018  | YKR089C | TGL4  | aggatATGtaa    | 6      | 12                 | 3     | 0      | 4               | 17.8           | 21.7        | 15.3       |
| chrXII@125473to125553 | YLL012W | YEH1  | atatagATGgct   | 81     | -21                | 1     | 5      | 1               | 12.5           | 18.6        | 12.4       |
| chrXII@108353to108321 | YLL019C | KNS1  | aacgatATGgct   | 33     | 424                | 0     | 2      | 7               | 38.1           | 19.8        | 5.4        |
| chrXII@108346to108296 | YLL019C | KNS1  | tggcttATGgcc   | 51     | 399                | 0     | 10     | 7               | 38.1           | 19.8        | 5.4        |
| chrXII@108332to108321 | YLL019C | KNS1  | gttgcaATGctg   | 12     | 424                | 0     | 0      | 7               | 38.1           | 19.8        | 5.4        |
| chrXII@108231to108214 | YLL019C | KNS1  | tatattATGaag   | 18     | 317                | 3     | 4      | 7               | 38.1           | 19.8        | 5.4        |
| chrXII@80314to80228   | YLL031C | GPI13 | aaataaATGggt   | 87     | 25                 | 0     | 8      | 0               | 13.6           | 27.6        | 20.8       |
| chrXII@80283to80275   | YLL031C | GPI13 | aagcatATGttt   | 9      | 72                 | 0     | 0      | 0               | 13.6           | 27.6        | 20.8       |
| chrXII@49922to49930   | YLL043W | FPS1  | attctaATGcat   | 9      | 6                  | 1     | 6      | 1               | 45.2           | 48.8        | 29.4       |
| chrXII@39523to39509   | YLL051C | FRE6  | gcagcaATGatt   | 15     | 40                 | 0     | 5      | 0               | 28.6           | 38.3        | 7.1        |
| chrXII@39492to39472   | YLL051C | FRE6  | tgaagcATGacg   | 21     | 3                  | 0     | 2      | 0               | 28.6           | 38.3        | 7.1        |
| chrXII@35265to35257   | YLL054C |       | acaagaATGatg   | 9      | 55                 | 0     | 0      | 2               | 10.3           | 16.7        | 3.0        |
| chrXII@35262to35257   | YLL054C |       | aagatgATGtga   | 6      | 55                 | 0     | 0      | 2               | 10.3           | 16.7        | 3.0        |
| chrXII@35230to35219   | YLL054C |       | aaatctATGaca   | 12     | 17                 | 2     | 1      | 2               | 10.3           | 16.7        | 3.0        |
| chrXII@29886to29891   | YLL055W | YCT1  | acgggtATGtaa   | 6      | 217                | 0     | 0      | 0               | 15.6           | 35.2        | 1.4        |
| chrXII@29893to29898   | YLL055W | YCT1  | tgtaatATGtag   | 6      | 210                | 0     | 0      | 0               | 15.6           | 35.2        | 1.4        |
| chrXII@29942to29959   | YLL055W | YCT1  | gtcaagATGaat   | 18     | 149                | 0     | 0      | 0               | 15.6           | 35.2        | 1.4        |
| chrXII@29962to29976   | YLL055W | YCT1  | ttaaaaATGcgt   | 15     | 132                | 0     | 2      | 0               | 15.6           | 35.2        | 1.4        |
| chrXII@28388to28347   | YLL056C |       | tcaactATGctt   | 42     | 43                 | 1     | 5      | 1               | 12.9           | 7.1         | 0.0        |
| chrXII@21909to21877   | YLL060C | GTT2  | ttctcaATGatt   | 33     | 39                 | 0     | 3      | 0               | 60.4           | 46.9        | 0.6        |
| chrXII@21899to21801   | YLL060C | GTT2  | ttaataATGtgc   | 99     | -37                | 0     | 7      | 0               | 60.4           | 46.9        | 0.6        |
| chrXII@168999to169073 | YLR011W | LOT6  | tttgacATGcct   | 75     | 28                 | 7     | 16     | 5               | 62.9           | 40.5        | 16.4       |
| chrXII@174994to174977 | YLR014C | PPR1  | acgaagATGatg   | 18     | -3                 | 16    | 0      | 33              | 28.6           | 27.6        | 2.8        |
| chrXII@174991to174977 | YLR014C | PPR1  | aagatgATGatt   | 15     | -3                 | 13    | 0      | 33              | 28.6           | 27.6        | 2.8        |
| chrXII@183587to183634 | YLR021W | IRC25 | aaaagaATGggc   | 48     | -13                | 7     | 11     | 3               | 64.1           | 87.2        | 35.8       |
| chrXII@204181to204198 | YLR031W |       | aaacagATGgtt   | 18     | 27                 | 0     | 3      | 0               | 39.1           | 75.8        | 0.7        |
| chrXII@239234to239217 | YLR046C |       | ggccctATGtac   | 18     | 404                | 0     | 0      | 4               | 33.1           | 44.0        | 0.3        |
| chrXII@239126to239100 | YLR046C |       | cgaaaaATGaca   | 27     | 287                | 0     | 3      | 4               | 33.1           | 44.0        | 0.3        |
| chrXII@239110to239048 | YLR046C |       | atattaATGgat   | 63     | 235                | 0     | 9      | 4               | 33.1           | 44.0        | 0.3        |
| chrXII@239065to239048 | YLR046C |       | atttgtATGtct   | 18     | 235                | 0     | 2      | 4               | 33.1           | 44.0        | 0.3        |
| chrXII@239046to239008 | YLR046C |       | tataagATGaat   | 39     | 195                | 0     | 3      | 4               | 33.1           | 44.0        | 0.3        |
| chrXII@239003to238980 | YLR046C |       | gaatacATGaca   | 24     | 167                | 0     | 6      | 4               | 33.1           | 44.0        | 0.3        |
| chrXII@238911to238840 | YLR046C |       | ctgattATGaag   | 72     | 27                 | 4     | 16     | 4               | 33.1           | 44.0        | 0.3        |
| chrXII@238899to238840 | YLR046C |       | gtttttATGcat   | 60     | 27                 | 1     | 15     | 4               | 33.1           | 44.0        | 0.3        |
| chrXII@247187to247198 | YLR052W | IES3  | tcttcaATGgaa   | 12     | 3                  | 1     | 1      | 1               | 50.1           | 54.6        | 44.8       |
| chrXII@270964to270996 | YLR068W | FYV7  | acaagaATGata   | 33     | 12                 | 0     | 7      | 0               | 77.9           | 129.0       | 88.2       |
| chrXII@278842to278853 | YLR072W |       | gagagcATGgta   | 12     | 9                  | 0     | 0      | 0               | 100.1          | 32.5        | 8.3        |
| chrXII@320647to320694 | YLR090W | XDJ1  | agagatATGccg   | 48     | 7                  | 0     | 9      | 0               | 50.1           | 92.6        | 18.1       |
| chrXII@346050to346000 | YLR103C | CDC45 | gtagtaATGcca   | 51     | 59                 | 1     | 2      | 1               | 20.9           | 32.5        | 6.5        |
| chrXII@346545to346583 | YLR104W |       | atagcgATGgtt   | 39     | 2                  | 0     | 10     | 0               | 115.5          | 129.3       | 39.4       |

Continued on next page

Table S3: All uORFs, continued

| uORF                    | CDS     | Gene  | Initiator Site | Length | uORF end<br>to CDS | # Rib | # mRNA | 5' UTR<br># Rib | 5' UTR<br>mRNA | CDS<br>mRNA | CDS<br>Rib |
|-------------------------|---------|-------|----------------|--------|--------------------|-------|--------|-----------------|----------------|-------------|------------|
| chrXII@371317to371514   | YLR113W | HOG1  | ccctacATGgtc   | 198    | 106                | 16    | 165    | 22              | 205.5          | 221.1       | 60.1       |
| chrXII@390370to390329   | YLR121C | YPS3  | atatatATGtac   | 42     | 59                 | 0     | 7      | 1               | 24.0           | 12.8        | 9.2        |
| chrXII@390349to390329   | YLR121C | YPS3  | ttatatATGaat   | 21     | 59                 | 0     | 2      | 1               | 24.0           | 12.8        | 9.2        |
| chrXII@395578to395570   | YLR126C |       | aaaattATGcat   | 9      | 50                 | 3     | 5      | 3               | 75.1           | 67.9        | 29.4       |
| chrXII@398346to398332   | YLR127C | APC2  | atatttATGgct   | 15     | 13                 | 0     | 0      | 0               | 10.8           | 19.1        | 4.1        |
| chrXII@399580to399585   | YLR129W | DIP2  | atatagATGtag   | 6      | 72                 | 0     | 0      | 0               | 60.5           | 156.0       | 39.9       |
| chrXII@404201to404145   | YLR130C | ZRT2  | ctatatATGatg   | 57     | 83                 | 28    | 44     | 29              | 200.3          | 281.1       | 12.3       |
| chrXII@404198to404145   | YLR130C | ZRT2  | tatatgATGata   | 54     | 83                 | 28    | 44     | 29              | 200.3          | 281.1       | 12.3       |
| chrXII@444866to444852   | YLR152C |       | gggtcaATGtct   | 15     | 164                | 0     | 1      | 7               | 17.0           | 20.3        | 1.1        |
| chrXII@444760to444710   | YLR152C |       | ttctacATGtgt   | 51     | 22                 | 7     | 4      | 7               | 17.0           | 20.3        | 1.1        |
| chrXII@444730to444710   | YLR152C |       | ttttatATGgtg   | 21     | 22                 | 4     | 2      | 7               | 17.0           | 20.3        | 1.1        |
| chrXII@444698to444636   | YLR152C |       | caataaATGaac   | 63     | -52                | 0     | 0      | 7               | 17.0           | 20.3        | 1.1        |
| chrXII@493831to493881   | YLR164W |       | ggttctaATGaat  | 51     | 3                  | 0     | 11     | 2               | 45.2           | 51.2        | 2.0        |
| chrXII@528248to528277   | YLR188W | MDL1  | acttcaATGaga   | 30     | 24                 | 16    | 5      | 16              | 27.6           | 32.1        | 17.1       |
| chrXII@534469to534452   | YLR189C | ATG26 | aaagtcATGgct   | 18     | 58                 | 1     | 2      | 7               | 33.4           | 26.8        | 6.4        |
| chrXII@534427to534416   | YLR189C | ATG26 | cactttATGctt   | 12     | 22                 | 7     | 2      | 7               | 33.4           | 26.8        | 6.4        |
| chrXII@541653to541648   | YLR194C |       | ataagtATGtaa   | 6      | 74                 | 0     | 2      | 2               | 121.7          | 82.8        | 52.4       |
| chrXII@568446to568451   | YLR214W | FRE1  | taaatcATGtaa   | 6      | 117                | 0     | 0      | 4               | 78.4           | 203.1       | 97.5       |
| chrXII@568485to568511   | YLR214W | FRE1  | tcttccATGctt   | 27     | 57                 | 3     | 7      | 4               | 78.4           | 203.1       | 97.5       |
| chrXII@586424to586468   | YLR224W |       | tgtactATGcct   | 45     | -3                 | 4     | 7      | 13              | 62.2           | 79.4        | 8.7        |
| chrXII@641350to641487   | YLR251W | SYM1  | agtgatATGata   | 138    | -22                | 16    | 35     | 15              | 62.3           | 83.7        | 4.8        |
| chrXII@641370to641390   | YLR251W | SYM1  | atttgaATGcta   | 21     | 75                 | 5     | 2      | 15              | 62.3           | 83.7        | 4.8        |
| chrXII@641375to641437   | YLR251W | SYM1  | aattgctATGttg  | 63     | 28                 | 12    | 18     | 15              | 62.3           | 83.7        | 4.8        |
| chrXII@642601to642621   | YLR253W |       | agttgaATGttt   | 21     | 7                  | 19    | 7      | 20              | 52.6           | 64.2        | 10.6       |
| chrXII@707082to706969   | YLR284C | ECI1  | gagtgtATGgca   | 114    | -72                | 1     | 3      | 0               | 37.1           | 46.5        | 7.6        |
| chrXII@715060to715077   | YLR289W | GUF1  | agagccATGaat   | 18     | 13                 | 1     | 4      | 1               | 23.6           | 25.4        | 4.0        |
| chrXII@715066to715077   | YLR289W | GUF1  | atgaatATGgga   | 12     | 13                 | 1     | 3      | 1               | 23.6           | 25.4        | 4.0        |
| chrXII@725885to725911   | YLR299W | ECM38 | atatatATGtgt   | 27     | 159                | 1     | 2      | 3               | 9.7            | 10.0        | 9.6        |
| chrXII@779147to779185   | YLR324W | PEX30 | gtgggcATGcaa   | 39     | 29                 | 0     | 5      | 0               | 22.7           | 24.9        | 20.2       |
| chrXII@784823to784831   | YLR328W | NMA1  | atctgcATGgta   | 9      | 81                 | 11    | 1      | 18              | 31.7           | 51.1        | 48.1       |
| chrXII@834343to834372   | YLR353W | BUD8  | ttctacATGga    | 30     | -22                | 0     | 0      | 4               | 22.3           | 25.8        | 6.9        |
| chrXII@846060to846104   | YLR360W | VPS38 | gaattgATGgtt   | 45     | -3                 | 13    | 8      | 13              | 58.9           | 68.8        | 7.6        |
| chrXII@873562to873530   | YLR376C | PSY3  | tagcgaATGgaa   | 33     | -22                | 0     | 0      | 1               | 42.2           | 52.3        | 7.3        |
| chrXII@873557to873540   | YLR376C | PSY3  | aatggaATGgga   | 18     | -12                | 0     | 0      | 1               | 42.2           | 52.3        | 7.3        |
| chrXII@879718to879741   | YLR381W | CTF3  | ttttacATGaat   | 24     | -19                | 0     | 1      | 1               | 34.8           | 20.4        | 2.9        |
| chrXII@885282to885290   | YLR383W | SMC6  | tgctaaATGgta   | 9      | -3                 | 0     | 0      | 0               | 15.0           | 15.9        | 5.4        |
| chrXII@902745to902728   | YLR389C | STE23 | tcctgaATGaat   | 18     | 69                 | 0     | 0      | 0               | 15.8           | 31.4        | 27.1       |
| chrXII@903057to903077   | YLR390W | ECM19 | aacgcgATGaag   | 21     | -12                | 0     | 0      | 3               | 10.8           | 25.8        | 42.9       |
| chrXII@924491to924477   | YLR401C | DUS3  | acattaATGaac   | 15     | 30                 | 0     | 0      | 0               | 35.8           | 67.1        | 39.0       |
| chrXII@982707to982787   | YLR425W | TUS1  | gagaggATGatc   | 81     | 103                | 1     | 2      | 13              | 5.5            | 9.7         | 4.6        |
| chrXII@982818to982829   | YLR425W | TUS1  | actgttATGaac   | 12     | 61                 | 7     | 1      | 13              | 5.5            | 9.7         | 4.6        |
| chrXII@988354to988374   | YLR427W | MAG2  | cgttggATGtgg   | 21     | 50                 | 0     | 1      | 0               | 45.6           | 49.7        | 16.2       |
| chrXII@993382to993429   | YLR430W | SEN1  | ctctgtATGgca   | 48     | 1                  | 10    | 0      | 19              | 8.9            | 11.8        | 11.7       |
| chrXII@1035949to1035984 | YLR451W | LEU3  | aaagtaATGgac   | 36     | 105                | 0     | 0      | 5               | 28.4           | 36.3        | 14.2       |
| chrXII@1035974to1036048 | YLR451W | LEU3  | agtatcATGata   | 75     | 41                 | 4     | 8      | 5               | 28.4           | 36.3        | 14.2       |
| chrXII@1043989to1043994 | YLR454W |       | cggtatATGtag   | 6      | 1                  | 0     | 0      | 2               | 2.6            | 8.7         | 4.3        |

Continued on next page

Table S3: All uORFs, continued

| uORF                   | CDS     | Gene   | Initiator Site | Length | uORF end<br>to CDS | # Rib | # mRNA | 5' UTR<br># Rib | 5' UTR<br>mRNA | CDS<br>mRNA | CDS<br>Rib |
|------------------------|---------|--------|----------------|--------|--------------------|-------|--------|-----------------|----------------|-------------|------------|
| chrXIII@253762to253782 | YML007W | YAP1   | ttgtgcATGaac   | 21     | 65                 | 2     | 12     | 12              | 110.3          | 83.4        | 39.0       |
| chrXIII@251525to251496 | YML009C | MRPL39 | atatttATGtgc   | 30     | -19                | 6     | 8      | 6               | 357.6          | 217.0       | 197.6      |
| chrXIII@241727to241701 | YML016C | PPZ1   | caatacATGtta   | 27     | 166                | 19    | 35     | 29              | 154.1          | 62.2        | 19.1       |
| chrXIII@228709to228683 | YML023C | NSE5   | agatatATGaag   | 27     | 20                 | 2     | 5      | 1               | 45.2           | 54.0        | 2.7        |
| chrXIII@228689to228666 | YML023C | NSE5   | cggcaaATGgtg   | 24     | 3                  | 1     | 6      | 1               | 45.2           | 54.0        | 2.7        |
| chrXIII@221305to221331 | YML027W | YOX1   | ttcagtATGatt   | 27     | 74                 | 0     | 0      | 0               | 32.6           | 21.8        | 28.6       |
| chrXIII@191780to191748 | YML043C | RRN11  | tctaataATGatg  | 33     | -18                | 1     | 1      | 3               | 87.6           | 73.1        | 5.7        |
| chrXIII@191777to191748 | YML043C | RRN11  | aataatATGcat   | 30     | -18                | 1     | 1      | 3               | 87.6           | 73.1        | 5.7        |
| chrXIII@164477to164472 | YML056C | IMD4   | gccctaATGtga   | 6      | 297                | 0     | 0      | 66              | 201.6          | 583.5       | 304.6      |
| chrXIII@164422to164375 | YML056C | IMD4   | ttcgagATGctg   | 48     | 200                | 12    | 0      | 66              | 201.6          | 583.5       | 304.6      |
| chrXIII@164343to164233 | YML056C | IMD4   | caaatcATGctt   | 111    | 58                 | 38    | 174    | 66              | 201.6          | 583.5       | 304.6      |
| chrXIII@164274to164233 | YML056C | IMD4   | gaaaaaATGgtg   | 42     | 58                 | 35    | 131    | 66              | 201.6          | 583.5       | 304.6      |
| chrXIII@137489to137497 | YML068W | ITT1   | tatgtcATGgtg   | 9      | 52                 | 2     | 2      | 13              | 77.4           | 63.7        | 3.8        |
| chrXIII@137529to137558 | YML068W | ITT1   | taactgATGaaa   | 30     | -9                 | 10    | 7      | 13              | 77.4           | 63.7        | 3.8        |
| chrXIII@97724to97623   | YML086C | ALO1   | tagttgATGggc   | 102    | 253                | 0     | 0      | 12              | 17.0           | 50.5        | 102.6      |
| chrXIII@97670to97623   | YML086C | ALO1   | atttccATGatt   | 48     | 253                | 0     | 0      | 12              | 17.0           | 50.5        | 102.6      |
| chrXIII@97583to97461   | YML086C | ALO1   | aaaaaaATGgaa   | 123    | 91                 | 0     | 9      | 12              | 17.0           | 50.5        | 102.6      |
| chrXIII@97577to97461   | YML086C | ALO1   | atggaaATGagg   | 117    | 91                 | 0     | 9      | 12              | 17.0           | 50.5        | 102.6      |
| chrXIII@77220to77237   | YML098W | TAF13  | tgcaacATGaaa   | 18     | 29                 | 5     | 3      | 4               | 41.1           | 114.4       | 35.0       |
| chrXIII@56727to56750   | YML106W | URA5   | cattgtATGaag   | 24     | 22                 | 39    | 28     | 134             | 516.0          | 564.8       | 402.1      |
| chrXIII@46769to46819   | YML111W | BUL2   | acagatATGcgt   | 51     | 122                | 4     | 2      | 5               | 32.3           | 33.9        | 16.8       |
| chrXIII@38099to38155   | YML116W | ATR1   | tataaaATGaat   | 57     | 40                 | 35    | 27     | 33              | 98.0           | 105.0       | 8.5        |
| chrXIII@38108to38155   | YML116W | ATR1   | aataaaATGcat   | 48     | 40                 | 29    | 23     | 33              | 98.0           | 105.0       | 8.5        |
| chrXIII@30515to30547   | YML119W |        | ttgtacATGaaa   | 33     | 63                 | 0     | 0      | 0               | 26.6           | 90.3        | 19.9       |
| chrXIII@26809to26889   | YML121W | GTR1   | agttcaATGtgg   | 81     | 40                 | 7     | 27     | 7               | 78.4           | 184.4       | 27.8       |
| chrXIII@26837to26857   | YML121W | GTR1   | gtgattATGgta   | 21     | 72                 | 3     | 9      | 7               | 78.4           | 184.4       | 27.8       |
| chrXIII@16778to16761   | YML128C | MSC1   | ccactcATGgag   | 18     | 85                 | 1     | 1      | 6               | 42.6           | 42.2        | 6.8        |
| chrXIII@16759to16673   | YML128C | MSC1   | cctagcATGatt   | 87     | -3                 | 6     | 18     | 6               | 42.6           | 42.2        | 6.8        |
| chrXIII@282832to282797 | YMR008C | PLB1   | tagaagATGact   | 36     | 214                | 1     | 4      | 3               | 20.4           | 23.3        | 27.5       |
| chrXIII@284870to284899 | YMR010W |        | tcttccATGgag   | 30     | 199                | 4     | 5      | 18              | 37.3           | 57.8        | 25.5       |
| chrXIII@296836to296795 | YMR013C | SEC59  | tattctATGaaa   | 42     | 59                 | 0     | 1      | 0               | 33.0           | 79.0        | 7.9        |
| chrXIII@325506to325477 | YMR026C | PEX12  | ttttgcATGaag   | 30     | 44                 | 17    | 9      | 20              | 65.4           | 86.8        | 8.4        |
| chrXIII@337775to337783 | YMR033W | ARP9   | tactatATGcat   | 9      | 3                  | 0     | 4      | 4               | 215.7          | 154.8       | 42.5       |
| chrXIII@340826to340770 | YMR034C |        | ccgtctATGcta   | 57     | 50                 | 2     | 2      | 0               | 8.0            | 17.5        | 2.4        |
| chrXIII@350326to350376 | YMR040W | YET2   | tgagacATGaat   | 51     | 3                  | 4     | 10     | 4               | 38.4           | 49.6        | 3.0        |
| chrXIII@350333to350338 | YMR040W | YET2   | tgaattATGtga   | 6      | 41                 | 1     | 0      | 4               | 38.4           | 49.6        | 3.0        |
| chrXIII@352532to352585 | YMR042W | ARG80  | gtagctATGcga   | 54     | 16                 | 1     | 8      | 2               | 27.3           | 44.5        | 10.4       |
| chrXIII@406228to406251 | YMR068W | AVO2   | ttgaaaATGtat   | 24     | 51                 | 0     | 1      | 0               | 12.5           | 31.5        | 4.0        |
| chrXIII@408921to408926 | YMR070W | MOT3   | cttttgATGtaa   | 6      | 226                | 0     | 0      | 3               | 13.7           | 25.7        | 22.8       |
| chrXIII@413691to413696 | YMR075W | RCO1   | ttcctcATGtag   | 6      | 284                | 0     | 2      | 0               | 24.1           | 35.7        | 13.7       |
| chrXIII@431225to431202 | YMR081C | ISF1   | aagtgATGgac    | 24     | 109                | 0     | 0      | 0               | 6.3            | 1.0         | 0.4        |
| chrXIII@458226to458303 | YMR096W | SNZ1   | ttcttcATGact   | 78     | 103                | 0     | 12     | 0               | 19.6           | 22.1        | 0.9        |
| chrXIII@458320to458367 | YMR096W | SNZ1   | agagctATGgac   | 48     | 39                 | 0     | 2      | 0               | 19.6           | 22.1        | 0.9        |
| chrXIII@458333to458386 | YMR096W | SNZ1   | aagtctATGgta   | 54     | 20                 | 0     | 1      | 0               | 19.6           | 22.1        | 0.9        |
| chrXIII@497476to497426 | YMR114C |        | tacctgATGcta   | 51     | -21                | 3     | 4      | 0               | 35.3           | 23.5        | 9.1        |
| chrXIII@505320to505334 | YMR119W | ASI1   | gaaactATGcta   | 15     | -3                 | 1     | 0      | 25              | 50.1           | 66.5        | 10.4       |

Continued on next page

Table S3: All uORFs, continued

| uORF                   | CDS     | Gene  | Initiator Site | Length | uORF end<br>to CDS | # Rib | # mRNA | 5' UTR<br># Rib | 5' UTR<br>mRNA | CDS<br>mRNA | CDS<br>Rib |
|------------------------|---------|-------|----------------|--------|--------------------|-------|--------|-----------------|----------------|-------------|------------|
| chrXIII@523439to523434 | YMR127C | SAS2  | tagagtATGtag   | 6      | 91                 | 1     | 0      | 3               | 78.3           | 85.7        | 10.9       |
| chrXIII@537721to537759 | YMR134W |       | gcctttATGaaa   | 39     | 77                 | 0     | 1      | 1               | 13.1           | 45.3        | 37.4       |
| chrXIII@563028to563036 | YMR152W | YIM1  | atttgaATGgag   | 9      | 58                 | 0     | 0      | 1               | 32.8           | 45.7        | 42.5       |
| chrXIII@599231to599196 | YMR168C | CEP3  | aagagaATGaaa   | 36     | 40                 | 0     | 0      | 2               | 9.7            | 24.9        | 3.9        |
| chrXIII@599196to599149 | YMR168C | CEP3  | cagggtATGaca   | 48     | -7                 | 2     | 3      | 2               | 9.7            | 24.9        | 3.9        |
| chrXIII@605681to605670 | YMR171C | EAR1  | tgctgcATGgag   | 12     | 152                | 2     | 2      | 15              | 39.8           | 46.2        | 12.5       |
| chrXIII@611703to611732 | YMR176W | ECM5  | tcgtgtATGttc   | 30     | 6                  | 2     | 1      | 3               | 14.7           | 15.9        | 2.3        |
| chrXIII@625181to625107 | YMR182C | RGM1  | atttagcATGaca  | 75     | -58                | 1     | 1      | 1               | 6.6            | 6.0         | 1.0        |
| chrXIII@647060to647077 | YMR192W | GYL1  | tactgcATGtat   | 18     | 39                 | 3     | 2      | 5               | 8.7            | 19.5        | 21.0       |
| chrXIII@647074to647103 | YMR192W | GYL1  | actcttATGatt   | 30     | 13                 | 3     | 3      | 5               | 8.7            | 19.5        | 21.0       |
| chrXIII@653981to654010 | YMR195W | ICY1  | aaactaATGaca   | 30     | 22                 | 108   | 40     | 110             | 245.5          | 471.6       | 110.6      |
| chrXIII@659206to659165 | YMR197C | VTI1  | tgctgcATGgct   | 42     | -31                | 0     | 0      | 1               | 50.1           | 83.0        | 72.9       |
| chrXIII@683585to683568 | YMR207C | HFA1  | caaacATGgta    | 18     | 6                  | 1     | 0      | 1               | 7.1            | 7.9         | 1.5        |
| chrXIII@740183to740197 | YMR234W | RNH1  | aatttcATGgca   | 15     | 67                 | 4     | 0      | 6               | 35.0           | 40.9        | 14.0       |
| chrXIII@784306to784298 | YMR258C |       | gctcacATGata   | 9      | 19                 | 13    | 1      | 13              | 55.2           | 78.7        | 12.0       |
| chrXIII@794863to794910 | YMR263W | SAP30 | gtgataATGcaa   | 48     | 7                  | 2     | 14     | 2               | 64.5           | 179.2       | 45.8       |
| chrXIII@801726to801752 | YMR267W | PPA2  | gcttgtATGcgt   | 27     | 18                 | 3     | 11     | 4               | 87.5           | 101.7       | 32.6       |
| chrXIII@806529to806482 | YMR270C | RRN9  | atattgATGtgt   | 48     | 61                 | 0     | 15     | 0               | 101.0          | 145.5       | 11.1       |
| chrXIII@835103to835083 | YMR282C | AEP2  | aaatttATGatt   | 21     | -13                | 0     | 0      | 4               | 50.1           | 68.1        | 10.4       |
| chrXIII@914710to914696 | YMR319C | FET4  | gattcgATGctc   | 15     | 161                | 1     | 8      | 5               | 206.3          | 331.3       | 29.8       |
| chrXIII@914661to914653 | YMR319C | FET4  | cacggcATGaat   | 9      | 118                | 4     | 3      | 5               | 206.3          | 331.3       | 29.8       |
| chrXIV@625861to625853  | YNL003C | PET8  | acaccgATGaac   | 9      | 23                 | 2     | 2      | 8               | 158.5          | 103.1       | 16.4       |
| chrXIV@613423to613397  | YNL011C |       | aagaatATGtcg   | 27     | 227                | 1     | 4      | 4               | 40.8           | 91.2        | 10.2       |
| chrXIV@613413to613387  | YNL011C |       | cgtacaATGtgt   | 27     | 217                | 0     | 2      | 4               | 40.8           | 91.2        | 10.2       |
| chrXIV@613366to613307  | YNL011C |       | cgtgtaATGctt   | 60     | 137                | 1     | 13     | 4               | 40.8           | 91.2        | 10.2       |
| chrXIV@613353to613297  | YNL011C |       | gatattATGtgg   | 57     | 127                | 1     | 12     | 4               | 40.8           | 91.2        | 10.2       |
| chrXIV@613297to613250  | YNL011C |       | acgctaATGtgt   | 48     | 80                 | 2     | 9      | 4               | 40.8           | 91.2        | 10.2       |
| chrXIV@613290to613270  | YNL011C |       | tgtgtgATGttt   | 21     | 100                | 1     | 4      | 4               | 40.8           | 91.2        | 10.2       |
| chrXIV@613253to613197  | YNL011C |       | cggactATGaaa   | 57     | 27                 | 0     | 10     | 4               | 40.8           | 91.2        | 10.2       |
| chrXIV@609543to609563  | YNL012W | SPO1  | ttttttATGttt   | 21     | 123                | 0     | 2      | 1               | 5.4            | 7.0         | 1.5        |
| chrXIV@609625to609651  | YNL012W | SPO1  | aagtaaATGcac   | 27     | 35                 | 0     | 0      | 1               | 5.4            | 7.0         | 1.5        |
| chrXIV@602756to602794  | YNL016W | PUB1  | taaagcATGcct   | 39     | 113                | 3     | 1      | 4               | 65.8           | 96.5        | 401.0      |
| chrXIV@585349to585317  | YNL025C | SSN8  | caaaaaATGccc   | 33     | 26                 | 4     | 5      | 4               | 40.9           | 23.9        | 6.1        |
| chrXIV@548062to548103  | YNL042W | BOP3  | cattacATGgaa   | 42     | -3                 | 13    | 4      | 13              | 23.6           | 21.3        | 8.0        |
| chrXIV@537934to537911  | YNL049C | SFB2  | ccattaATGatc   | 24     | 0                  | 0     | 0      | 0               | 16.7           | 32.2        | 23.3       |
| chrXIV@529667to529723  | YNL053W | MSG5  | acaggaATGtac   | 57     | 219                | 0     | 10     | 3               | 20.5           | 34.1        | 11.5       |
| chrXIV@529689to529694  | YNL053W | MSG5  | aggaaaATGtag   | 6      | 248                | 0     | 0      | 3               | 20.5           | 34.1        | 11.5       |
| chrXIV@529706to529723  | YNL053W | MSG5  | tttttgATGttt   | 18     | 219                | 0     | 6      | 3               | 20.5           | 34.1        | 11.5       |
| chrXIV@529757to529807  | YNL053W | MSG5  | acaaaaATGtta   | 51     | 135                | 0     | 1      | 3               | 20.5           | 34.1        | 11.5       |
| chrXIV@529839to529853  | YNL053W | MSG5  | agggttATGcaa   | 15     | 89                 | 3     | 2      | 3               | 20.5           | 34.1        | 11.5       |
| chrXIV@517244to517252  | YNL056W | OCA2  | ttcttgATGcta   | 9      | -3                 | 0     | 0      | 8               | 130.2          | 167.7       | 39.1       |
| chrXIV@507641to507670  | YNL063W | MTQ1  | cggccaATGtct   | 30     | 88                 | 3     | 5      | 8               | 26.9           | 44.4        | 5.7        |
| chrXIV@507721to507837  | YNL063W | MTQ1  | agttgaATGgta   | 117    | -79                | 5     | 3      | 8               | 26.9           | 44.4        | 5.7        |
| chrXIV@503631to503675  | YNL065W | AQR1  | aaaattATGgat   | 45     | 49                 | 2     | 15     | 2               | 104.1          | 100.5       | 9.5        |
| chrXIV@483399to483407  | YNL076W | MKS1  | atttgaATGatc   | 9      | 149                | 6     | 3      | 11              | 44.1           | 44.5        | 13.3       |
| chrXIV@447458to447469  | YNL094W | APP1  | tgtcatATGttt   | 12     | 143                | 5     | 3      | 15              | 34.2           | 32.9        | 4.0        |

Continued on next page

Table S3: All uORFs, continued

| uORF                  | CDS     | Gene  | Initiator Site | Length | uORF end<br>to CDS | # Rib | # mRNA | 5' UTR<br># Rib | 5' UTR<br>mRNA | CDS<br>mRNA | CDS<br>Rib |
|-----------------------|---------|-------|----------------|--------|--------------------|-------|--------|-----------------|----------------|-------------|------------|
| chrXIV@392816to392827 | YNL124W | NAF1  | aaaaagATGgta   | 12     | 66                 | 0     | 1      | 0               | 18.5           | 43.7        | 23.1       |
| chrXIV@392824to392871 | YNL124W | NAF1  | ggtaggATGata   | 48     | 22                 | 0     | 1      | 0               | 18.5           | 43.7        | 23.1       |
| chrXIV@392836to392871 | YNL124W | NAF1  | ggtaggATGaa    | 36     | 22                 | 0     | 1      | 0               | 18.5           | 43.7        | 23.1       |
| chrXIV@392846to392890 | YNL124W | NAF1  | agcggATGaaa    | 45     | 3                  | 0     | 1      | 0               | 18.5           | 43.7        | 23.1       |
| chrXIV@357139to357144 | YNL142W | MEP2  | taagaaATGtaa   | 6      | 310                | 1     | 0      | 15              | 23.6           | 18.5        | 1.9        |
| chrXIV@357228to357359 | YNL142W | MEP2  | ttatcaATGaag   | 132    | 95                 | 12    | 13     | 15              | 23.6           | 18.5        | 1.9        |
| chrXIV@357299to357307 | YNL142W | MEP2  | ttacacATGtgc   | 9      | 147                | 1     | 2      | 15              | 23.6           | 18.5        | 1.9        |
| chrXIV@350725to350847 | YNL147W | LSM7  | tgctctATGttc   | 123    | 94                 | 0     | 9      | 24              | 59.1           | 199.1       | 244.2      |
| chrXIV@350856to350897 | YNL147W | LSM7  | atcacgATGtac   | 42     | 44                 | 19    | 22     | 24              | 59.1           | 199.1       | 244.2      |
| chrXIV@349795to349787 | YNL149C | PGA2  | gaaaagATGtta   | 9      | 30                 | 1     | 2      | 8               | 383.1          | 621.3       | 239.9      |
| chrXIV@349790to349767 | YNL149C | PGA2  | gatgttATGaag   | 24     | 10                 | 8     | 23     | 8               | 383.1          | 621.3       | 239.9      |
| chrXIV@342136to341912 | YNL156C | NSG2  | acattgATGata   | 225    | -57                | 24    | 105    | 27              | 136.1          | 195.8       | 35.2       |
| chrXIV@326340to326299 | YNL164C | IBD2  | attttcATGcca   | 42     | -22                | 2     | 5      | 4               | 201.6          | 157.3       | 16.4       |
| chrXIV@297686to297678 | YNL182C | IPI3  | gggcatATGcgt   | 9      | 50                 | 1     | 2      | 0               | 158.4          | 184.9       | 38.6       |
| chrXIV@289372to289386 | YNL186W | UBP10 | aggagcATGcat   | 15     | 113                | 4     | 3      | 9               | 81.0           | 87.0        | 38.9       |
| chrXIV@287772to288038 | YNL187W |       | acatagATGgta   | 267    | -43                | 6     | 21     | 6               | 19.1           | 19.4        | 1.0        |
| chrXIV@287788to287799 | YNL187W |       | ggcattATGagt   | 12     | 196                | 0     | 0      | 6               | 19.1           | 19.4        | 1.0        |
| chrXIV@287809to287823 | YNL187W |       | gaaaaaATGatg   | 15     | 172                | 4     | 1      | 6               | 19.1           | 19.4        | 1.0        |
| chrXIV@287812to287823 | YNL187W |       | aaaatgATGaaa   | 12     | 172                | 2     | 1      | 6               | 19.1           | 19.4        | 1.0        |
| chrXIV@287820to288038 | YNL187W |       | gaaagaATGaat   | 219    | -43                | 2     | 20     | 6               | 19.1           | 19.4        | 1.0        |
| chrXIV@287824to287874 | YNL187W |       | gaatgaATGcaa   | 51     | 121                | 1     | 7      | 6               | 19.1           | 19.4        | 1.0        |
| chrXIV@287878to287910 | YNL187W |       | tagcgaATGtat   | 33     | 85                 | 0     | 5      | 6               | 19.1           | 19.4        | 1.0        |
| chrXIV@287882to287899 | YNL187W |       | gaatgtATGgaa   | 18     | 96                 | 0     | 2      | 6               | 19.1           | 19.4        | 1.0        |
| chrXIV@287903to287926 | YNL187W |       | taaggaATGggt   | 24     | 69                 | 1     | 4      | 6               | 19.1           | 19.4        | 1.0        |
| chrXIV@287976to288038 | YNL187W |       | atcaatATGaca   | 63     | -43                | 0     | 0      | 6               | 19.1           | 19.4        | 1.0        |
| chrXIV@286304to286360 | YNL188W | KAR1  | gagttcATGaat   | 57     | -52                | 0     | 0      | 2               | 292.7          | 80.5        | 8.9        |
| chrXIV@280399to280419 | YNL191W | DUG3  | atttgaATGtat   | 21     | 13                 | 6     | 3      | 6               | 34.5           | 43.2        | 18.6       |
| chrXIV@250338to250318 | YNL211C |       | aagaatATGttt   | 21     | 3                  | 23    | 7      | 23              | 90.4           | 92.9        | 25.1       |
| chrXIV@218738to218733 | YNL230C | ELA1  | atacatATGtaa   | 6      | 71                 | 1     | 0      | 4               | 32.4           | 18.1        | 4.3        |
| chrXIV@218727to218692 | YNL230C | ELA1  | acttacATGcaa   | 36     | 30                 | 2     | 6      | 4               | 32.4           | 18.1        | 4.3        |
| chrXIV@218708to218637 | YNL230C | ELA1  | ttgttcATGgaa   | 72     | -25                | 2     | 2      | 4               | 32.4           | 18.1        | 4.3        |
| chrXIV@218688to218659 | YNL230C | ELA1  | tagtgaATGtat   | 30     | -3                 | 1     | 2      | 4               | 32.4           | 18.1        | 4.3        |
| chrXIV@218672to218637 | YNL230C | ELA1  | cgattgATGtcg   | 36     | -25                | 1     | 1      | 4               | 32.4           | 18.1        | 4.3        |
| chrXIV@202258to202299 | YNL238W | KEX2  | tttcatATGcat   | 42     | 129                | 7     | 10     | 14              | 32.0           | 41.8        | 23.5       |
| chrXIV@200482to201933 | YNL239W | LAP3  | tgttacATGcgt   | 1452   | -1364              | 22    | 13     | 29              | 33.8           | 46.9        | 80.4       |
| chrXIV@200097to200056 | YNL240C | NAR1  | catcgcATGaa    | 42     | 79                 | 0     | 0      | 0               | 18.7           | 41.5        | 11.3       |
| chrXIV@200085to200056 | YNL240C | NAR1  | aaaaaaATGata   | 30     | 79                 | 0     | 0      | 0               | 18.7           | 41.5        | 11.3       |
| chrXIV@200069to200004 | YNL240C | NAR1  | cgttttATGgtg   | 66     | 27                 | 0     | 6      | 0               | 18.7           | 41.5        | 11.3       |
| chrXIV@200063to200004 | YNL240C | NAR1  | atgggtATGact   | 60     | 27                 | 0     | 6      | 0               | 18.7           | 41.5        | 11.3       |
| chrXIV@181092to181051 | YNL249C | MPA43 | ttaaaaATGtat   | 42     | 29                 | 5     | 5      | 5               | 17.1           | 53.8        | 2.9        |
| chrXIV@181054to181031 | YNL249C | MPA43 | ctttaaATGaga   | 24     | 9                  | 0     | 0      | 5               | 17.1           | 53.8        | 2.9        |
| chrXIV@169322to169308 | YNL254C |       | gtagcgATGaga   | 15     | 60                 | 0     | 0      | 1               | 41.4           | 39.5        | 10.9       |
| chrXIV@169296to169264 | YNL254C |       | tactgtATGtgc   | 33     | 16                 | 1     | 7      | 1               | 41.4           | 39.5        | 10.9       |
| chrXIV@164558to164569 | YNL256W | FOL1  | tagtaaATGcaa   | 12     | 54                 | 1     | 0      | 2               | 51.5           | 94.0        | 19.6       |
| chrXIV@164376to164281 | YNL257C | SIP3  | agctgcATGagt   | 96     | -39                | 10    | 4      | 10              | 11.6           | 24.6        | 6.4        |
| chrXIV@117050to117166 | YNL277W | MET2  | tgtggATGcac    | 117    | 182                | 0     | 0      | 0               | 6.3            | 23.1        | 8.9        |

Continued on next page

Table S3: All uORFs, continued

| uORF                  | CDS       | Gene  | Initiator Site | Length | uORF end<br>to CDS | # Rib | # mRNA | 5' UTR<br># Rib | 5' UTR<br>mRNA | CDS<br>mRNA | CDS<br>Rib |
|-----------------------|-----------|-------|----------------|--------|--------------------|-------|--------|-----------------|----------------|-------------|------------|
| chrXIV@117078to117239 | YNL277W   | MET2  | taagtcATGtta   | 162    | 109                | 0     | 0      | 0               | 6.3            | 23.1        | 8.9        |
| chrXIV@117163to117291 | YNL277W   | MET2  | caatagATGgac   | 129    | 57                 | 0     | 3      | 0               | 6.3            | 23.1        | 8.9        |
| chrXIV@80281to80240   | YNL294C   | RIM21 | cactcgATGaat   | 42     | -19                | 1     | 7      | 2               | 103.5          | 103.8       | 5.4        |
| chrXIV@22679to22629   | YNL329C   | PEX6  | gcatatATGtgt   | 51     | -3                 | 0     | 5      | 0               | 19.7           | 27.8        | 4.1        |
| chrXIV@635912to635947 | YNR004W   |       | gactaaATGcat   | 36     | -3                 | 0     | 4      | 0               | 19.8           | 38.9        | 15.8       |
| chrXIV@647373to647390 | YNR012W   | URK1  | atttatATGcga   | 18     | 43                 | 1     | 4      | 1               | 65.0           | 77.0        | 24.2       |
| chrXIV@652348to652413 | YNR014W   |       | acacaaATGtat   | 66     | 53                 | 3     | 1      | 5               | 8.5            | 5.3         | 4.8        |
| chrXIV@652358to652381 | YNR014W   |       | atatatATGtgt   | 24     | 85                 | 2     | 0      | 5               | 8.5            | 5.3         | 4.8        |
| chrXIV@652364to652381 | YNR014W   |       | atgtgtATGtat   | 18     | 85                 | 0     | 0      | 5               | 8.5            | 5.3         | 4.8        |
| chrXIV@652372to652413 | YNR014W   |       | gtatatATGtat   | 42     | 53                 | 1     | 1      | 5               | 8.5            | 5.3         | 4.8        |
| chrXIV@652384to652413 | YNR014W   |       | ataggtATGtgt   | 30     | 53                 | 0     | 1      | 5               | 8.5            | 5.3         | 4.8        |
| chrXIV@652413to652451 | YNR014W   |       | aaactaATGatc   | 39     | 15                 | 1     | 5      | 5               | 8.5            | 5.3         | 4.8        |
| chrXIV@661716to661705 | YNR016C   | ACC1  | cggtgcATGtgc   | 12     | 330                | 2     | 0      | 210             | 30.3           | 55.6        | 228.3      |
| chrXIV@687601to687696 | YNR033W   | ABZ1  | tacacgATGacc   | 96     | -60                | 0     | 5      | 0               | 36.4           | 42.0        | 16.1       |
| chrXIV@699677to699694 | YNR040W   |       | tatcttATGtgg   | 18     | -3                 | 1     | 2      | 1               | 36.4           | 63.0        | 14.1       |
| chrXIV@711443to711469 | YNR048W   |       | catcagATGaag   | 27     | 162                | 1     | 1      | 2               | 19.2           | 44.1        | 8.7        |
| chrXIV@711466to711480 | YNR048W   |       | ttttcaATGaac   | 15     | 151                | 0     | 1      | 2               | 19.2           | 44.1        | 8.7        |
| chrXIV@711475to711480 | YNR048W   |       | aactctATGtag   | 6      | 151                | 0     | 0      | 2               | 19.2           | 44.1        | 8.7        |
| chrXIV@711539to711559 | YNR048W   |       | agaaggATGgcg   | 21     | 72                 | 1     | 0      | 2               | 19.2           | 44.1        | 8.7        |
| chrXIV@715464to715441 | YNR050C   | LYS9  | aattacATGgga   | 24     | 52                 | 1     | 3      | 3               | 104.6          | 157.6       | 136.2      |
| chrXIV@730401to730381 | YNR055C   | HOL1  | tatttcATGcta   | 21     | 195                | 7     | 3      | 19              | 82.8           | 93.6        | 22.7       |
| chrXIV@760937to760908 | YNR068C   |       | ctagtaATGctt   | 30     | 24                 | 0     | 0      | 0               | 7.2            | 14.6        | 0.0        |
| chrXIV@760895to760881 | YNR068C   |       | aacaaaATGtat   | 15     | -3                 | 0     | 0      | 0               | 7.2            | 14.6        | 0.0        |
| chrXV@324901to324957  | YOL001W   | PHO80 | catttgATGaat   | 57     | 292                | 12    | 12     | 29              | 59.4           | 38.1        | 4.0        |
| chrXV@324962to325054  | YOL001W   | PHO80 | aatctaATGccc   | 93     | 195                | 17    | 42     | 29              | 59.4           | 38.1        | 4.0        |
| chrXV@324394to323411  | YOL002C   | IZH2  | ttaattATGctg   | 984    | -953               | 4     | 18     | 4               | 135.3          | 388.2       | 39.3       |
| chrXV@324387to324349  | YOL002C   | IZH2  | tgctgcATGttg   | 39     | -15                | 4     | 16     | 4               | 135.3          | 388.2       | 39.3       |
| chrXV@310206to310129  | YOL009C   | MDM12 | tctaacATGaga   | 78     | -10                | 0     | 8      | 0               | 16.7           | 35.0        | 10.1       |
| chrXV@310194to310129  | YOL009C   | MDM12 | aaaagcATGcca   | 66     | -10                | 0     | 7      | 0               | 16.7           | 35.0        | 10.1       |
| chrXV@310184to310179  | YOL009C   | MDM12 | catcctATGtaa   | 6      | 40                 | 0     | 0      | 0               | 16.7           | 35.0        | 10.1       |
| chrXV@305209to305244  | YOL011W   | PLB3  | actactATGtta   | 36     | 105                | 0     | 18     | 0               | 95.4           | 36.5        | 9.5        |
| chrXV@299638to299721  | YOL014W   |       | gtgagaATGtct   | 84     | -28                | 31    | 35     | 38              | 117.3          | 159.9       | 6.0        |
| chrXV@292117to292067  | YOL018C   | TLG2  | caattgATGtac   | 51     | -7                 | 6     | 11     | 6               | 56.1           | 94.3        | 24.0       |
| chrXV@271377to271339  | YOL028C   | YAP7  | ctttcaATGgat   | 39     | -31                | 0     | 0      | 9               | 50.6           | 53.9        | 25.6       |
| chrXV@256489to256527  | YOL036W   |       | gcctatATGccc   | 39     | 216                | 19    | 8      | 24              | 33.4           | 34.8        | 17.2       |
| chrXV@255045to255019  | YOL038C-A |       | caattgATGgga   | 27     | 0                  | 5     | 10     | 14              | 81.7           | 22.5        | 18.9       |
| chrXV@255027to255019  | YOL038C-A |       | acttatATGatt   | 9      | 0                  | 0     | 0      | 14              | 81.7           | 22.5        | 18.9       |
| chrXV@249564to249532  | YOL043C   | NTG2  | caaaaaATGtat   | 33     | 0                  | 4     | 6      | 4               | 29.5           | 33.2        | 3.1        |
| chrXV@212178to212252  | YOL061W   | PRSS5 | gatgagATGaga   | 75     | -9                 | 2     | 23     | 2               | 94.0           | 188.2       | 96.7       |
| chrXV@168581to168592  | YOL082W   | ATG19 | tagtatATGttt   | 12     | 134                | 0     | 2      | 0               | 97.8           | 111.7       | 15.8       |
| chrXV@168626to168634  | YOL082W   | ATG19 | atctccATGata   | 9      | 92                 | 0     | 6      | 0               | 97.8           | 111.7       | 15.8       |
| chrXV@168631to168678  | YOL082W   | ATG19 | catgatATGagt   | 48     | 48                 | 0     | 30     | 0               | 97.8           | 111.7       | 15.8       |
| chrXV@159167to159175  | YOL086W-A |       | tagtagATGcaa   | 9      | -3                 | 0     | 0      | 0               | 76.3           | 128.2       | 51.7       |
| chrXV@153570to153562  | YOL089C   | HAL9  | gaataaATGtct   | 9      | 73                 | 1     | 0      | 0               | 14.9           | 18.8        | 6.9        |
| chrXV@139056to138106  | YOL096C   | COQ3  | agtcttATGgga   | 951    | -938               | 2     | 3      | 2               | 66.8           | 43.2        | 19.5       |
| chrXV@136005to136046  | YOL097W-A |       | atttacATGaat   | 42     | 173                | 0     | 0      | 3               | 41.0           | 39.4        | 1.1        |

Continued on next page

Table S3: All uORFs, continued

| uORF                 | CDS       | Gene  | Initiator Site | Length | uORF end<br>to CDS | # Rib | # mRNA | 5' UTR<br># Rib | 5' UTR<br>mRNA | CDS<br>mRNA | CDS<br>Rib |
|----------------------|-----------|-------|----------------|--------|--------------------|-------|--------|-----------------|----------------|-------------|------------|
| chrXV@136029to136046 | YOL097W-A |       | ggaaaaATGcag   | 18     | 173                | 0     | 0      | 3               | 41.0           | 39.4        | 1.1        |
| chrXV@136184to136231 | YOL097W-A |       | taaagtATGgta   | 48     | -12                | 2     | 9      | 3               | 41.0           | 39.4        | 1.1        |
| chrXV@129156to129179 | YOL100W   | PKH2  | atcttgATGaac   | 24     | 57                 | 13    | 2      | 14              | 12.5           | 13.6        | 6.1        |
| chrXV@123991to125829 | YOL103W   | ITR2  | tttttcATGgct   | 1839   | -1829              | 5     | 1      | 29              | 83.3           | 121.0       | 18.7       |
| chrXV@117662to117654 | YOL104C   | NDJ1  | taatccATGtgg   | 9      | 201                | 0     | 1      | 3               | 34.7           | 51.5        | 0.2        |
| chrXV@117594to117562 | YOL104C   | NDJ1  | ttacaaATGgaa   | 33     | 109                | 1     | 6      | 3               | 34.7           | 51.5        | 0.2        |
| chrXV@117505to117476 | YOL104C   | NDJ1  | attgtcATGaac   | 30     | 23                 | 0     | 6      | 3               | 34.7           | 51.5        | 0.2        |
| chrXV@115857to115837 | YOL105C   | WSC3  | cattatATGaaa   | 21     | 30                 | 0     | 6      | 1               | 39.7           | 35.0        | 2.6        |
| chrXV@115848to115837 | YOL105C   | WSC3  | aaattcATGtcc   | 12     | 30                 | 0     | 6      | 1               | 39.7           | 35.0        | 2.6        |
| chrXV@108987to108970 | YOL111C   | MDY2  | gaaaacATGcac   | 18     | 75                 | 3     | 1      | 5               | 13.4           | 44.4        | 121.3      |
| chrXV@106577to106588 | YOL112W   | MSB4  | ttacggATGgatt  | 12     | 121                | 11    | 4      | 13              | 47.0           | 75.6        | 4.9        |
| chrXV@106701to106712 | YOL112W   | MSB4  | cccggcATGaca   | 12     | -3                 | 0     | 1      | 13              | 47.0           | 75.6        | 4.9        |
| chrXV@91476to91465   | YOL122C   | SMF1  | tatttcATGaat   | 12     | 47                 | 2     | 1      | 2               | 71.5           | 91.6        | 23.7       |
| chrXV@83787to83846   | YOL125W   | TRM13 | gggtctATGgag   | 60     | -13                | 2     | 12     | 2               | 61.9           | 62.8        | 15.7       |
| chrXV@74297to74314   | YOL130W   | ALR1  | ttctacATGgaa   | 18     | 85                 | 32    | 3      | 38              | 83.6           | 89.9        | 22.6       |
| chrXV@65456to65473   | YOL137W   | BSC6  | atatcgATGttt   | 18     | 147                | 0     | 0      | 9               | 20.5           | 30.5        | 18.2       |
| chrXV@65514to65525   | YOL137W   | BSC6  | ccgatcATGcat   | 12     | 95                 | 0     | 0      | 9               | 20.5           | 30.5        | 18.2       |
| chrXV@65546to65554   | YOL137W   | BSC6  | tctaaaATGcta   | 9      | 66                 | 9     | 2      | 9               | 20.5           | 30.5        | 18.2       |
| chrXV@65406to65377   | YOL138C   |       | atacatATGgtg   | 30     | 28                 | 0     | 1      | 0               | 4.2            | 11.5        | 4.2        |
| chrXV@40614to40643   | YOL152W   | FRE7  | ttcattATGcac   | 30     | 103                | 0     | 5      | 1               | 28.3           | 35.2        | 10.6       |
| chrXV@40647to40688   | YOL152W   | FRE7  | taaaccATGcct   | 42     | 58                 | 1     | 3      | 1               | 28.3           | 35.2        | 10.6       |
| chrXV@34496to34552   | YOL154W   | ZPS1  | ccgcacATGctt   | 57     | 104                | 0     | 4      | 0               | 23.2           | 34.1        | 0.8        |
| chrXV@21323to21312   | YOL158C   | ENB1  | tcgtgaATGtct   | 12     | 3                  | 0     | 2      | 0               | 114.4          | 164.9       | 22.6       |
| chrXV@15604to15584   | YOL159C-A |       | tattaaATGaat   | 21     | 81                 | 0     | 1      | 0               | 65.3           | 100.5       | 39.7       |
| chrXV@9464to9478     | YOL163W   |       | tattgcATGgatt  | 15     | 117                | 0     | 0      | 0               | 3.3            | 6.3         | 0.4        |
| chrXV@9479to9520     | YOL163W   |       | gtttaaATGgcta  | 42     | 75                 | 0     | 0      | 0               | 3.3            | 6.3         | 0.4        |
| chrXV@331288to331323 | YOR003W   | YSP3  | cgagcaATGgcg   | 36     | 132                | 0     | 8      | 0               | 35.9           | 18.5        | 1.7        |
| chrXV@337437to337396 | YOR005C   | DNL4  | ctaactATGaaa   | 42     | 53                 | 0     | 0      | 0               | 13.8           | 19.2        | 2.4        |
| chrXV@337416to337396 | YOR005C   | DNL4  | aaacatATGtta   | 21     | 53                 | 0     | 0      | 0               | 13.8           | 19.2        | 2.4        |
| chrXV@337408to337376 | YOR005C   | DNL4  | gttaatATGtgg   | 33     | 33                 | 0     | 0      | 0               | 13.8           | 19.2        | 2.4        |
| chrXV@347226to347155 | YOR010C   | TIR2  | tccgtaATGatc   | 72     | 206                | 1     | 5      | 1               | 16.6           | 26.4        | 9.0        |
| chrXV@347176to347165 | YOR010C   | TIR2  | tgtaagATGttc   | 12     | 216                | 1     | 0      | 1               | 16.6           | 26.4        | 9.0        |
| chrXV@347142to347137 | YOR010C   | TIR2  | agcatcATGtga   | 6      | 188                | 0     | 0      | 1               | 16.6           | 26.4        | 9.0        |
| chrXV@347105to347076 | YOR010C   | TIR2  | aaagtaATGttc   | 30     | 127                | 0     | 8      | 1               | 16.6           | 26.4        | 9.0        |
| chrXV@347047to346922 | YOR010C   | TIR2  | cgaacaATGaga   | 126    | -27                | 0     | 9      | 1               | 16.6           | 26.4        | 9.0        |
| chrXV@377725to377708 | YOR023C   | AHC1  | gtgtatATGtcc   | 18     | -3                 | 0     | 0      | 1               | 8.3            | 19.4        | 12.8       |
| chrXV@389189to389209 | YOR031W   | CRS5  | actacaATGtca   | 21     | 3                  | 0     | 2      | 0               | 20.0           | 32.1        | 0.0        |
| chrXV@394610to394599 | YOR033C   | EXO1  | atctatATGctc   | 12     | 76                 | 7     | 1      | 7               | 38.0           | 56.8        | 5.5        |
| chrXV@412873to412923 | YOR044W   | IRC23 | ctgttgATGtat   | 51     | 83                 | 4     | 20     | 6               | 106.6          | 177.1       | 25.1       |
| chrXV@423817to423710 | YOR049C   | RSB1  | ttcaaaATGtcc   | 108    | -22                | 4     | 3      | 4               | 9.8            | 7.7         | 1.2        |
| chrXV@423740to423699 | YOR049C   | RSB1  | ccctttATGgtg   | 42     | -33                | 0     | 0      | 4               | 9.8            | 7.7         | 1.2        |
| chrXV@432120to432131 | YOR057W   | SGT1  | agcactATGaca   | 12     | 56                 | 6     | 0      | 4               | 53.9           | 73.5        | 35.5       |
| chrXV@432131to432148 | YOR057W   | SGT1  | aaagtaATGgca   | 18     | 39                 | 4     | 5      | 4               | 53.9           | 73.5        | 35.5       |
| chrXV@436354to436259 | YOR058C   | ASE1  | cttttgATGttg   | 96     | -87                | 1     | 0      | 6               | 15.0           | 23.6        | 12.9       |
| chrXV@441433to441450 | YOR061W   | CKA2  | gtttgtATGgatt  | 18     | 85                 | 19    | 5      | 32              | 110.3          | 164.0       | 86.8       |
| chrXV@446794to446684 | YOR064C   | YNG1  | actgaaATGtat   | 111    | -55                | 0     | 14     | 0               | 50.1           | 85.0        | 6.9        |

Continued on next page



Table S3: All uORFs, continued

| uORF                 | CDS     | Gene  | Initiator Site | Length | uORF end<br>to CDS | # Rib | # mRNA | 5' UTR<br># Rib | 5' UTR<br>mRNA | CDS<br>mRNA | CDS<br>Rib |
|----------------------|---------|-------|----------------|--------|--------------------|-------|--------|-----------------|----------------|-------------|------------|
| chrXV@446790to446779 | YOR064C | YNG1  | aaatgtATGatg   | 12     | 40                 | 0     | 3      | 0               | 50.1           | 85.0        | 6.9        |
| chrXV@446787to446779 | YOR064C | YNG1  | tgatagATGcgc   | 9      | 40                 | 0     | 3      | 0               | 50.1           | 85.0        | 6.9        |
| chrXV@480511to480777 | YOR084W | LPX1  | tgcgtaATGtgc   | 267    | -189               | 0     | 6      | 0               | 16.7           | 14.9        | 0.2        |
| chrXV@487628to487666 | YOR087W | YVC1  | tattcaATGcaa   | 39     | 42                 | 2     | 0      | 2               | 30.3           | 46.1        | 16.4       |
| chrXV@494806to494913 | YOR092W | ECM3  | gaatatATGttt   | 108    | 214                | 0     | 16     | 3               | 18.2           | 25.4        | 11.1       |
| chrXV@494864to494887 | YOR092W | ECM3  | tattatATGctt   | 24     | 240                | 0     | 3      | 3               | 18.2           | 25.4        | 11.1       |
| chrXV@516850to516449 | YOR103C | OST2  | gaatacATGact   | 402    | -392               | 1     | 7      | 23              | 317.7          | 336.2       | 145.1      |
| chrXV@521346to521405 | YOR107W | RGS2  | cagcacATGcca   | 60     | -52                | 0     | 0      | 1               | 13.4           | 10.5        | 0.2        |
| chrXV@533988to534008 | YOR113W | AZF1  | ctatagATGgtc   | 21     | 67                 | 2     | 0      | 5               | 15.2           | 9.3         | 12.3       |
| chrXV@539516to539508 | YOR115C | TRS33 | gacctcATGcca   | 9      | 43                 | 1     | 0      | 0               | 105.7          | 210.2       | 33.4       |
| chrXV@602458to602441 | YOR143C | THI80 | gcgtgaATGata   | 18     | 99                 | 1     | 0      | 0               | 109.8          | 156.8       | 27.6       |
| chrXV@609225to609199 | YOR148C | SPP2  | ggtaaaATGtct   | 27     | 2                  | 1     | 8      | 1               | 37.6           | 132.7       | 20.3       |
| chrXV@609204to609199 | YOR148C | SPP2  | tctaggATGtag   | 6      | 2                  | 0     | 0      | 1               | 37.6           | 132.7       | 20.3       |
| chrXV@618487to618467 | YOR152C |       | gataatATGtgg   | 21     | 179                | 0     | 5      | 2               | 39.9           | 17.6        | 5.6        |
| chrXV@624682to624702 | YOR154W | SLP1  | gacgcaATGgat   | 21     | 27                 | 1     | 2      | 2               | 34.1           | 93.9        | 8.6        |
| chrXV@658551to658583 | YOR174W | MED4  | aaagaaATGcga   | 33     | 164                | 0     | 3      | 2               | 66.8           | 165.0       | 15.2       |
| chrXV@658742to658774 | YOR174W | MED4  | caacgaATGtta   | 33     | -27                | 0     | 0      | 2               | 66.8           | 165.0       | 15.2       |
| chrXV@682449to682297 | YOR185C | GSP2  | gtcaagATGctc   | 153    | 191                | 0     | 5      | 20              | 7.7            | 23.2        | 30.4       |
| chrXV@682370to682215 | YOR185C | GSP2  | ccttacATGgcg   | 156    | 109                | 0     | 3      | 20              | 7.7            | 23.2        | 30.4       |
| chrXV@682333to682244 | YOR185C | GSP2  | tatacaATGtca   | 90     | 138                | 0     | 1      | 20              | 7.7            | 23.2        | 30.4       |
| chrXV@682274to682215 | YOR185C | GSP2  | agccgcATGtgg   | 60     | 109                | 0     | 0      | 20              | 7.7            | 23.2        | 30.4       |
| chrXV@682225to682190 | YOR185C | GSP2  | gtgtaaATGgta   | 36     | 84                 | 0     | 0      | 20              | 7.7            | 23.2        | 30.4       |
| chrXV@682183to682163 | YOR185C | GSP2  | ttcttgATGgaa   | 21     | 57                 | 18    | 2      | 20              | 7.7            | 23.2        | 30.4       |
| chrXV@710411to710449 | YOR193W | PEX27 | tagactATGacc   | 39     | -3                 | 2     | 4      | 0               | 26.1           | 29.3        | 5.8        |
| chrXV@741632to738924 | YOR211C | MGM1  | gaaagcATGagt   | 2709   | -2645              | 18    | 10     | 23              | 21.4           | 28.6        | 19.5       |
| chrXV@755067to755029 | YOR219C | STE13 | agcctcATGacc   | 39     | 20                 | 4     | 2      | 4               | 19.2           | 23.0        | 9.6        |
| chrXV@757926to757931 | YOR222W | ODC2  | tatcaaATGtaa   | 6      | 399                | 5     | 11     | 63              | 424.1          | 215.4       | 9.8        |
| chrXV@757937to757951 | YOR222W | ODC2  | aggacaATGaga   | 15     | 379                | 22    | 18     | 63              | 424.1          | 215.4       | 9.8        |
| chrXV@757944to757973 | YOR222W | ODC2  | tgagacATGgtt   | 30     | 357                | 11    | 49     | 63              | 424.1          | 215.4       | 9.8        |
| chrXV@758046to758054 | YOR222W | ODC2  | tctaacATGaaa   | 9      | 276                | 0     | 15     | 63              | 424.1          | 215.4       | 9.8        |
| chrXV@758066to758170 | YOR222W | ODC2  | ctacgaATGcta   | 105    | 160                | 0     | 269    | 63              | 424.1          | 215.4       | 9.8        |
| chrXV@758079to758288 | YOR222W | ODC2  | tattctATGcca   | 210    | 42                 | 2     | 450    | 63              | 424.1          | 215.4       | 9.8        |
| chrXV@758170to758232 | YOR222W | ODC2  | ttgttgATGact   | 63     | 98                 | 0     | 94     | 63              | 424.1          | 215.4       | 9.8        |
| chrXV@758206to758232 | YOR222W | ODC2  | ctcgacATGcat   | 27     | 98                 | 0     | 40     | 63              | 424.1          | 215.4       | 9.8        |
| chrXV@762789to762797 | YOR227W |       | ttgtatATGtat   | 9      | 28                 | 0     | 0      | 0               | 16.7           | 12.7        | 5.7        |
| chrXV@772530to772559 | YOR231W | MKK1  | tcatttATGgtt   | 30     | 42                 | 1     | 1      | 1               | 14.3           | 42.4        | 11.3       |
| chrXV@796855to796787 | YOR246C |       | aagacaATGgtt   | 69     | -6                 | 18    | 63     | 16              | 257.5          | 334.9       | 26.9       |
| chrXV@803511to803494 | YOR251C |       | caaacaATGagg   | 18     | 30                 | 0     | 0      | 0               | 50.1           | 132.4       | 77.1       |
| chrXV@841089to841069 | YOR275C | RIM20 | ttatctATGgag   | 21     | 2                  | 2     | 0      | 0               | 20.0           | 28.1        | 8.7        |
| chrXV@875359to875336 | YOR297C | TIM18 | acggtgATGcga   | 24     | 17                 | 3     | 0      | 3               | 41.0           | 75.1        | 46.5       |
| chrXV@889009to889056 | YOR305W |       | taaaacATGata   | 48     | -37                | 16    | 2      | 21              | 121.7          | 172.3       | 18.9       |
| chrXV@891588to891532 | YOR306C | MCH5  | tgcttgATGtac   | 57     | 103                | 7     | 40     | 7               | 111.4          | 155.6       | 7.5        |
| chrXV@894198to894160 | YOR307C | SLY41 | tattatATGctt   | 39     | 72                 | 16    | 7      | 32              | 39.2           | 73.3        | 18.3       |
| chrXV@894188to894135 | YOR307C | SLY41 | ttatatATGcaa   | 54     | 47                 | 22    | 9      | 32              | 39.2           | 73.3        | 18.3       |
| chrXV@904698to904709 | YOR315W | SFG1  | gtaaatATGttt   | 12     | 47                 | 3     | 5      | 19              | 75.1           | 177.4       | 67.4       |
| chrXV@912762to912782 | YOR319W | HSH49 | gtaaaaATGaat   | 21     | 36                 | 0     | 1      | 0               | 42.6           | 109.5       | 14.4       |

Continued on next page

Table S3: All uORFs, continued

| uORF                   | CDS     | Gene   | Initiator Site | Length | uORF end<br>to CDS | # Rib | # mRNA | 5' UTR<br># Rib | 5' UTR<br>mRNA | CDS<br>mRNA | CDS<br>Rib |
|------------------------|---------|--------|----------------|--------|--------------------|-------|--------|-----------------|----------------|-------------|------------|
| chrXV@912766to912843   | YOR319W | HSH49  | aatgaATGggc    | 78     | -25                | 0     | 7      | 0               | 42.6           | 109.5       | 14.4       |
| chrXV@96775to967663    | YOR342C |        | ctcctaATGagt   | 93     | 42                 | 4     | 19     | 3               | 67.3           | 106.0       | 33.0       |
| chrXV@967712to967677   | YOR342C |        | tcacttATGgta   | 36     | 56                 | 2     | 6      | 3               | 67.3           | 106.0       | 33.0       |
| chrXV@1010109to1010114 | YOR358W | HAP5   | gagataATGtaa   | 6      | 44                 | 2     | 0      | 3               | 37.6           | 38.9        | 12.7       |
| chrXV@1023258to1023172 | YOR363C | PIP2   | gagcggATGaaa   | 87     | -37                | 5     | 1      | 4               | 12.1           | 16.4        | 3.0        |
| chrXV@1055479to1055499 | YOR381W | FRE3   | aagagaATGatt   | 21     | 43                 | 0     | 2      | 1               | 15.4           | 29.5        | 0.5        |
| chrXV@1055499to1055612 | YOR381W | FRE3   | ttgctgATGaac   | 114    | -70                | 1     | 3      | 1               | 15.4           | 29.5        | 0.5        |
| chrXVI@552008to552040  | YPL003W | ULA1   | ccgtagATGaaa   | 33     | -24                | 0     | 0      | 0               | 54.6           | 70.1        | 5.9        |
| chrXVI@543888to543865  | YPL007C | TFC8   | agcagcATGact   | 24     | 21                 | 3     | 15     | 3               | 89.8           | 71.3        | 9.3        |
| chrXVI@539236to539277  | YPL008W | CHL1   | cagttgATGaca   | 42     | 104                | 4     | 0      | 5               | 18.9           | 36.1        | 3.4        |
| chrXVI@539285to539296  | YPL008W | CHL1   | cagcacATGcta   | 12     | 85                 | 0     | 3      | 5               | 18.9           | 36.1        | 3.4        |
| chrXVI@506647to506679  | YPL022W | RAD1   | tgctaaATGtgt   | 33     | 15                 | 5     | 5      | 5               | 21.6           | 40.0        | 3.7        |
| chrXVI@495461to495481  | YPL029W | SUV3   | tcaactATGaaa   | 21     | 22                 | 0     | 0      | 0               | 17.2           | 47.3        | 6.5        |
| chrXVI@467154to467189  | YPL045W | VPS16  | tcacctATGatt   | 36     | 67                 | 8     | 3      | 5               | 16.7           | 38.0        | 7.7        |
| chrXVI@466961to466944  | YPL046C | ELC1   | aaatTTATGaat   | 18     | 5                  | 3     | 5      | 3               | 66.8           | 122.0       | 36.9       |
| chrXVI@453197to453180  | YPL057C | SUR1   | cttcgcATGttt   | 18     | 127                | 24    | 7      | 29              | 31.8           | 27.8        | 26.9       |
| chrXVI@426163to426207  | YPL066W |        | tgtgggATGctt   | 45     | 22                 | 1     | 6      | 0               | 24.6           | 32.2        | 4.4        |
| chrXVI@426189to426200  | YPL066W |        | ttttctATGggt   | 12     | 29                 | 0     | 0      | 0               | 24.6           | 32.2        | 4.4        |
| chrXVI@420530to420489  | YPL071C |        | gtttaaATGact   | 42     | -25                | 4     | 6      | 4               | 53.9           | 72.8        | 22.7       |
| chrXVI@410387to410494  | YPL076W | GPI2   | tttcgtATGacc   | 108    | -55                | 9     | 8      | 9               | 22.9           | 22.5        | 10.0       |
| chrXVI@381918to381923  | YPL088W |        | ccaactATGtaa   | 6      | 38                 | 0     | 0      | 0               | 89.5           | 106.8       | 3.2        |
| chrXVI@375458to375484  | YPL091W | GLR1   | cttcatATGtat   | 27     | 14                 | 6     | 14     | 7               | 89.0           | 179.1       | 130.2      |
| chrXVI@359421to359320  | YPL103C | FMP30  | gattgcATGcct   | 102    | -82                | 1     | 1      | 0               | 57.2           | 37.1        | 8.5        |
| chrXVI@289168to289151  | YPL140C | MKK2   | atttatATGttg   | 18     | 119                | 0     | 7      | 1               | 37.7           | 44.3        | 8.9        |
| chrXVI@289145to289119  | YPL140C | MKK2   | atttgcATGaaa   | 27     | 87                 | 0     | 0      | 1               | 37.7           | 44.3        | 8.9        |
| chrXVI@277546to277514  | YPL146C | NOP53  | acgttaATGaat   | 33     | -13                | 0     | 4      | 3               | 100.1          | 174.0       | 136.7      |
| chrXVI@272857to272813  | YPL148C | PPT2   | tttctaATGaac   | 45     | 0                  | 5     | 24     | 5               | 84.5           | 63.8        | 3.9        |
| chrXVI@272825to272292  | YPL148C | PPT2   | ctttgaATGcct   | 534    | -521               | 0     | 1      | 5               | 84.5           | 63.8        | 3.9        |
| chrXVI@271224to271232  | YPL149W | ATG5   | taaataATGaag   | 9      | 76                 | 0     | 0      | 14              | 119.7          | 154.0       | 6.0        |
| chrXVI@271234to271275  | YPL149W | ATG5   | agtagcATGctc   | 42     | 33                 | 3     | 40     | 14              | 119.7          | 154.0       | 6.0        |
| chrXVI@271250to271300  | YPL149W | ATG5   | gtgcgaATGaat   | 51     | 8                  | 5     | 46     | 14              | 119.7          | 154.0       | 6.0        |
| chrXVI@271297to271305  | YPL149W | ATG5   | aaacctATGatg   | 9      | 3                  | 2     | 0      | 14              | 119.7          | 154.0       | 6.0        |
| chrXVI@271300to271305  | YPL149W | ATG5   | cctatgATGtaa   | 6      | 3                  | 1     | 0      | 14              | 119.7          | 154.0       | 6.0        |
| chrXVI@267567to267520  | YPL151C | PRP46  | ccgaggATGcag   | 48     | -13                | 6     | 4      | 6               | 22.9           | 64.3        | 9.4        |
| chrXVI@267549to267520  | YPL151C | PRP46  | tgttacATGgag   | 30     | -13                | 2     | 4      | 6               | 22.9           | 64.3        | 9.4        |
| chrXVI@256844to256800  | YPL156C | PRM4   | atatatATGttc   | 45     | 35                 | 2     | 28     | 3               | 54.9           | 29.0        | 15.4       |
| chrXVI@254445to254431  | YPL158C |        | acaaatATGttg   | 15     | 123                | 0     | 0      | 1               | 14.3           | 34.3        | 27.5       |
| chrXVI@244116to244108  | YPL162C |        | acttgaATGtac   | 9      | 83                 | 0     | 1      | 0               | 15.0           | 39.4        | 13.5       |
| chrXVI@222867to222811  | YPL174C | NIP100 | actcatATGctg   | 57     | 40                 | 15    | 9      | 15              | 15.1           | 22.0        | 1.2        |
| chrXVI@222852to222811  | YPL174C | NIP100 | gactttATGttg   | 42     | 40                 | 14    | 7      | 15              | 15.1           | 22.0        | 1.2        |
| chrXVI@214282to214265  | YPL177C | CUP9   | ttattcATGtac   | 18     | 305                | 0     | 1      | 29              | 41.6           | 125.6       | 79.5       |
| chrXVI@214201to214184  | YPL177C | CUP9   | atattaATGatt   | 18     | 224                | 0     | 0      | 29              | 41.6           | 125.6       | 79.5       |
| chrXVI@214187to214128  | YPL177C | CUP9   | ttttctATGact   | 60     | 168                | 0     | 0      | 29              | 41.6           | 125.6       | 79.5       |
| chrXVI@214147to214121  | YPL177C | CUP9   | ctcttaATGcct   | 27     | 161                | 0     | 0      | 29              | 41.6           | 125.6       | 79.5       |
| chrXVI@214116to214072  | YPL177C | CUP9   | aagattATGtta   | 45     | 112                | 11    | 10     | 29              | 41.6           | 125.6       | 79.5       |
| chrXVI@213995to213957  | YPL177C | CUP9   | acttttATGcta   | 39     | -3                 | 10    | 19     | 29              | 41.6           | 125.6       | 79.5       |

Continued on next page

Table S3: All uORFs, continued

| uORF                  | CDS       | Gene   | Initiator Site | Length | uORF end<br>to CDS | # Rib | # mRNA | 5' UTR<br># Rib | 5' UTR<br>mRNA | CDS<br>mRNA | CDS<br>Rib |
|-----------------------|-----------|--------|----------------|--------|--------------------|-------|--------|-----------------|----------------|-------------|------------|
| chrXVI@181333to181404 | YPL193W   | RSA1   | tcattgATGcta   | 72     | -3                 | 2     | 16     | 3               | 31.9           | 56.0        | 23.0       |
| chrXVI@181394to181411 | YPL193W   | RSA1   | tgcgacATGgac   | 18     | -10                | 0     | 0      | 3               | 31.9           | 56.0        | 23.0       |
| chrXVI@163651to163535 | YPL206C   | PGC1   | ttgttgATGtta   | 117    | -60                | 5     | 19     | 4               | 100.1          | 125.0       | 76.3       |
| chrXVI@150245to150219 | YPL214C   | THI6   | ctaaccATGggt   | 27     | 30                 | 6     | 5      | 0               | 45.5           | 46.7        | 6.1        |
| chrXVI@121256to121248 | YPL227C   | ALG5   | aattggATGctg   | 9      | 82                 | 2     | 10     | 3               | 147.3          | 230.7       | 51.2       |
| chrXVI@117061to117069 | YPL229W   |        | tattacATGaaa   | 9      | -3                 | 0     | 0      | 0               | 18.6           | 28.6        | 13.6       |
| chrXVI@85371to85357   | YPL246C   | RBD2   | agggggATGgga   | 15     | 61                 | 0     | 1      | 0               | 50.5           | 106.3       | 56.8       |
| chrXVI@55379to55347   | YPL258C   | THI21  | tctttaATGata   | 33     | 195                | 0     | 8      | 1               | 19.5           | 14.6        | 0.2        |
| chrXVI@55368to55243   | YPL258C   | THI21  | acgtatATGtat   | 126    | 91                 | 1     | 18     | 1               | 19.5           | 14.6        | 0.2        |
| chrXVI@55339to55325   | YPL258C   | THI21  | agatcgATGcat   | 15     | 173                | 0     | 0      | 1               | 19.5           | 14.6        | 0.2        |
| chrXVI@55284to55243   | YPL258C   | THI21  | agagaaATGctc   | 42     | 91                 | 1     | 7      | 1               | 19.5           | 14.6        | 0.2        |
| chrXVI@28270to28163   | YPL272C   |        | atttgtATGggg   | 108    | 0                  | 0     | 4      | 0               | 10.1           | 12.5        | 1.3        |
| chrXVI@585700to585686 | YPR013C   |        | tgttctATGgct   | 15     | 105                | 0     | 0      | 0               | 17.9           | 15.9        | 2.6        |
| chrXVI@594423to594431 | YPR018W   | RLF2   | aattatATGttt   | 9      | 41                 | 2     | 2      | 2               | 44.1           | 32.7        | 21.4       |
| chrXVI@603543to603523 | YPR021C   | AGC1   | ttttatATGtta   | 21     | 170                | 3     | 3      | 8               | 21.7           | 21.3        | 6.6        |
| chrXVI@603394to603371 | YPR021C   | AGC1   | gaaagtATGcag   | 24     | 18                 | 4     | 3      | 8               | 21.7           | 21.3        | 6.6        |
| chrXVI@634044to634106 | YPR032W   | SRO7   | tggaaATGtta    | 63     | 13                 | 0     | 3      | 0               | 9.5            | 11.0        | 17.8       |
| chrXVI@682192to682197 | YPR067W   | ISA2   | ttgtacATGtga   | 6      | 19                 | 6     | 1      | 11              | 68.8           | 30.4        | 21.4       |
| chrXVI@690080to690145 | YPR072W   | NOT5   | gattgcATGaaa   | 66     | -42                | 4     | 6      | 6               | 118.5          | 82.7        | 101.7      |
| chrXVI@709869to709831 | YPR085C   |        | ggtgtgATGtgc   | 39     | 6                  | 3     | 4      | 3               | 18.2           | 32.1        | 4.5        |
| chrXVI@709840to708494 | YPR085C   |        | attacaATGggc   | 1347   | -1331              | 1     | 0      | 3               | 18.2           | 32.1        | 4.5        |
| chrXVI@729780to729797 | YPR100W   | MRPL51 | gaatatATGgag   | 18     | -9                 | 0     | 2      | 4               | 333.8          | 196.5       | 116.4      |
| chrXVI@744660to744683 | YPR109W   |        | taatctATGttt   | 24     | 3                  | 4     | 9      | 12              | 67.3           | 106.6       | 9.3        |
| chrXVI@754820to754861 | YPR115W   |        | ctttttATGgct   | 42     | 13                 | 2     | 2      | 2               | 6.6            | 19.0        | 4.8        |
| chrXVI@759722to759745 | YPR117W   |        | ggctgtATGatt   | 24     | 277                | 0     | 0      | 0               | 10.1           | 5.8         | 0.3        |
| chrXVI@759812to759841 | YPR117W   |        | atacacATGcat   | 30     | 181                | 0     | 1      | 0               | 10.1           | 5.8         | 0.3        |
| chrXVI@778463to778534 | YPR121W   | THI22  | attataATGttg   | 72     | 44                 | 0     | 12     | 0               | 43.2           | 36.0        | 0.4        |
| chrXVI@778567to778596 | YPR121W   | THI22  | agcagtATGcct   | 30     | -18                | 0     | 0      | 0               | 43.2           | 36.0        | 0.4        |
| chrXVI@790011to790049 | YPR127W   |        | ttttctATGtta   | 39     | 29                 | 3     | 5      | 3               | 22.5           | 33.9        | 10.7       |
| chrXVI@790016to790021 | YPR127W   |        | tatggtATGtag   | 6      | 57                 | 2     | 1      | 3               | 22.5           | 33.9        | 10.7       |
| chrXVI@812554to812540 | YPR138C   | MEP3   | caatcaATGcag   | 15     | 92                 | 1     | 5      | 10              | 68.1           | 46.4        | 8.5        |
| chrXVI@825056to824994 | YPR145C-A |        | agcataATGgca   | 63     | 73                 | 0     | 2      | 1               | 32.0           | 15.1        | 12.9       |
| chrXVI@833496to833428 | YPR152C   | URN1   | tctgatATGtat   | 69     | -25                | 0     | 5      | 0               | 33.4           | 54.1        | 14.4       |
| chrXVI@841196to841276 | YPR157W   |        | ccgtcaATGaca   | 81     | -15                | 0     | 2      | 0               | 7.9            | 8.7         | 0.4        |
| chrXVI@887843to887829 | YPR173C   | VPS4   | tagtagATGggg   | 15     | -3                 | 2     | 2      | 2               | 116.3          | 162.4       | 45.3       |
| chrXVI@895804to895772 | YPR179C   | HDA3   | ataaaaATGata   | 33     | 13                 | 1     | 1      | 1               | 14.3           | 45.6        | 7.7        |
| chrXVI@907206to907346 | YPR185W   | ATG13  | aatagcATGagt   | 141    | -133               | 0     | 0      | 2               | 19.4           | 16.6        | 8.2        |

**Table S3.** All uORFs. All upstream AUG codons in a 5'UTR, as annotated by Nagalakshmi *et al.* (SI), were used to predict candidate uORFs. The genomic coordinates of the uORF are listed, along with the downstream protein-coding gene and the initiation sequence context. The length of the uORF is shown, along with the distance from the last nucleotide in the uORF to the first nucleotide in the coding sequence. When the uORF ends downstream of the start codon, this distance will be negative. In a few cases, such as *LAP3* and *MGM1*, the uORF extends in-frame into the protein-coding gene and thus represents an alternate

initiation site rather than a uORF. The raw number sequencing reads is shown for ribosome footprints in the uORF specifically, for mRNA fragments in the uORF specifically, and for ribosome footprints on the entire annotated 5' UTR. The density of sequencing reads (in rpKM) is shown for mRNA fragments in the 5' UTR and the associated CDS, and for ribosome footprints in the CDS.

**Table S4: uORFs in Abundant mRNAs**

| uORF                    | CDS     | Gene   | Initiator Site | Length | uORF end to CDS | # Rib | # mRNA | 5' UTR # Rib | 5' UTR mRNA | CDS mRNA | CDS Rib |
|-------------------------|---------|--------|----------------|--------|-----------------|-------|--------|--------------|-------------|----------|---------|
| chrV@140123to140112     | YEL009C | GCN4   | tgaaaaATGgct   | 12     | 350             | 698   | 25     | 878          | 407.8       | 614.3    | 38.4    |
| chrXIII@653981to654010  | YMR195W | ICY1   | aaactaATGaca   | 30     | 22              | 108   | 40     | 110          | 245.5       | 471.6    | 110.6   |
| chrV@139938to139927     | YEL009C | GCN4   | gctatcATGtac   | 12     | 165             | 61    | 13     | 878          | 407.8       | 614.3    | 38.4    |
| chrXIII@56727to56750    | YML106W | URA5   | cattgtATGaag   | 24     | 22              | 39    | 28     | 134          | 516.0       | 564.8    | 402.1   |
| chrIV@548367to548356    | YDR045C | RPC11  | cgttatATGgct   | 12     | 49              | 32    | 18     | 34           | 333.2       | 352.7    | 117.6   |
| chrXV@299638to299721    | YOL014W |        | gtgagaATGtct   | 84     | -28             | 31    | 35     | 38           | 117.3       | 159.9    | 6.0     |
| chrXII@404201to404145   | YLR130C | ZRT2   | ctatatATGatg   | 57     | 83              | 28    | 44     | 29           | 200.3       | 281.1    | 12.3    |
| chrXII@404198to404145   | YLR130C | ZRT2   | tatatgATGata   | 54     | 83              | 28    | 44     | 29           | 200.3       | 281.1    | 12.3    |
| chrV@140055to140047     | YEL009C | GCN4   | agaattATGtgt   | 9      | 285             | 26    | 6      | 878          | 407.8       | 614.3    | 38.4    |
| chrII@602514to602531    | YBR187W | GDT1   | acgtttATGaaa   | 18     | 97              | 24    | 29     | 10           | 327.0       | 420.0    | 144.9   |
| chrXIV@342136to341912   | YNL156C | NSG2   | acattgATGata   | 225    | -57             | 24    | 105    | 27           | 136.1       | 195.8    | 35.2    |
| chrXV@757937to757951    | YOR222W | ODC2   | aggacaATGaga   | 15     | 379             | 22    | 18     | 63           | 424.1       | 215.4    | 9.8     |
| chrXIII@241727to241701  | YML016C | PPZ1   | caatacATGtta   | 27     | 166             | 19    | 35     | 29           | 154.1       | 62.2     | 19.1    |
| chrXV@441433to441450    | YOR061W | CKA2   | gtttgtATGatt   | 18     | 85              | 19    | 5      | 32           | 110.3       | 164.0    | 86.8    |
| chrXV@796855to796787    | YOR246C |        | aagacaATGggt   | 69     | -6              | 18    | 63     | 16           | 257.5       | 334.9    | 26.9    |
| chrXII@371317to371514   | YLR113W | HOG1   | ccctacATGgtc   | 198    | 106             | 16    | 165    | 22           | 205.5       | 221.1    | 60.1    |
| chrXV@889009to889056    | YOR305W |        | taaaacATGata   | 48     | -37             | 16    | 2      | 21           | 121.7       | 172.3    | 18.9    |
| chrV@139913to139902     | YEL009C | GCN4   | ttcaagATGttt   | 12     | 140             | 14    | 19     | 878          | 407.8       | 614.3    | 38.4    |
| chrII@556326to556334    | YBR158W | AMN1   | aactatATGtgt   | 9      | 208             | 13    | 14     | 41           | 441.6       | 247.2    | 41.1    |
| chrIV@550626to550573    | YDR046C | BAP3   | ctattgATGgat   | 54     | 0               | 11    | 30     | 17           | 129.2       | 125.3    | 44.6    |
| chrXV@757944to757973    | YOR222W | ODC2   | tgagacATGggt   | 30     | 357             | 11    | 49     | 63           | 424.1       | 215.4    | 9.8     |
| chrIV@1189625to1189596  | YDR357C |        | ttttacATGaaa   | 30     | 37              | 10    | 23     | 9            | 156.1       | 146.3    | 38.3    |
| chrIX@187689to187672    | YIL094C | LYS12  | gtatctATGcga   | 18     | 44              | 9     | 22     | 2            | 233.7       | 368.3    | 155.1   |
| chrII@723227to723286    | YBR253W | SRB6   | attgtgATGata   | 60     | -22             | 8     | 35     | 8            | 239.0       | 152.4    | 47.1    |
| chrIV@141749to141714    | YDL177C |        | gtattgATGttt   | 36     | -7              | 8     | 6      | 17           | 106.0       | 157.1    | 11.2    |
| chrXIV@349790to349767   | YNL149C | PGA2   | gatggtATGgag   | 24     | 10              | 8     | 23     | 8            | 383.1       | 621.3    | 239.9   |
| chrXV@891588to891532    | YOR306C | MCH5   | tgcttgATGtac   | 57     | 103             | 7     | 40     | 7            | 111.4       | 155.6    | 7.5     |
| chrIV@321654to321640    | YDL076C | RXT3   | aattccATGaca   | 15     | 89              | 6     | 2      | 11           | 100.1       | 159.2    | 27.9    |
| chrIV@1362719to1362748  | YDR452W | PPN1   | ggttttATGgta   | 30     | 121             | 6     | 3      | 5            | 109.8       | 132.7    | 27.7    |
| chrXIII@251525to251496  | YML009C | MRPL39 | atatttATGtgc   | 30     | -19             | 6     | 8      | 6            | 357.6       | 217.0    | 197.6   |
| chrXV@757926to757931    | YOR222W | ODC2   | tatcaaATGtaa   | 6      | 399             | 5     | 11     | 63           | 424.1       | 215.4    | 9.8     |
| chrXVI@271250to271300   | YPL149W | ATG5   | gtgcgaATGaat   | 51     | 8               | 5     | 46     | 14           | 119.7       | 154.0    | 6.0     |
| chrXVI@163651to163535   | YPL206C | PGC1   | ttgttgATGtta   | 117    | -60             | 5     | 19     | 4            | 100.1       | 125.0    | 76.3    |
| chrIV@93874to93848      | YDL205C | HEM3   | gtttgcATGgta   | 27     | 103             | 4     | 12     | 8            | 118.0       | 149.1    | 40.4    |
| chrVII@1025932to1025825 | YGR267C | FOL2   | tcaaacATGtct   | 108    | 85              | 4     | 83     | 12           | 194.2       | 319.8    | 130.3   |
| chrXIII@914661to914653  | YMR319C | FET4   | cacggcATGaat   | 9      | 118             | 4     | 3      | 5            | 206.3       | 331.3    | 29.8    |
| chrXV@412873to412923    | YOR044W | IRC23  | ctgttgATGtat   | 51     | 83              | 4     | 20     | 6            | 106.6       | 177.1    | 25.1    |
| chrXVI@690080to690145   | YPR072W | NOT5   | gattgcATGaaa   | 66     | -42             | 4     | 6      | 6            | 118.5       | 82.7     | 101.7   |
| chrVII@698542to698577   | YGR105W | VMA21  | gctaaaATGaac   | 36     | 25              | 3     | 25     | 3            | 241.2       | 284.3    | 228.9   |
| chrXI@434634to434605    | YKL005C | BYE1   | cttgcaATGaaa   | 30     | 86              | 3     | 6      | 1            | 102.0       | 50.2     | 15.6    |
| chrXVI@271234to271275   | YPL149W | ATG5   | agttagcATGctc  | 42     | 33              | 3     | 40     | 14           | 119.7       | 154.0    | 6.0     |
| chrIV@447616to447578    | YDL002C | NHP10  | aattggATGaga   | 39     | 4               | 2     | 28     | 5            | 189.1       | 224.4    | 53.7    |
| chrIV@1037144to1037170  | YDR288W | NSE3   | atcagtATGcta   | 27     | 20              | 2     | 12     | 0            | 181.5       | 138.0    | 17.6    |
| chrIV@1078457to1078434  | YDR308C | SRB7   | cattatATGctc   | 24     | -10             | 2     | 9      | 4            | 228.9       | 154.1    | 67.9    |
| chrVII@38824to38810     | YGL246C | RAI1   | tgtaatATGgtg   | 15     | 31              | 2     | 2      | 2            | 115.2       | 201.1    | 35.2    |

*Continued on next page*

Table S4: uORFs in Abundant mRNAs, continued

| uORF                    | CDS       | Gene   | Initiator Site | Length | uORF end<br>to CDS | # Rib | # mRNA | 5' UTR<br># Rib | 5' UTR<br>mRNA | CDS<br>mRNA | CDS<br>Rib |
|-------------------------|-----------|--------|----------------|--------|--------------------|-------|--------|-----------------|----------------|-------------|------------|
| chrVII@1025951to1025907 | YGR267C   | FOL2   | attttaATGctc   | 45     | 167                | 2     | 4      | 12              | 194.2          | 319.8       | 130.3      |
| chrVIII@198323to198267  | YHR046C   | INM1   | ttttggATGaatt  | 57     | -10                | 2     | 9      | 2               | 132.4          | 113.2       | 39.2       |
| chrXIII@253762to253782  | YML007W   | YAP1   | ttgtgcATGaac   | 21     | 65                 | 2     | 12     | 12              | 110.3          | 83.4        | 39.0       |
| chrXIV@625861to625853   | YNL003C   | PET8   | acaccgATGaac   | 9      | 23                 | 2     | 2      | 8               | 158.5          | 103.1       | 16.4       |
| chrXIV@503631to503675   | YNL065W   | AQR1   | aaaattATGgat   | 45     | 49                 | 2     | 15     | 2               | 104.1          | 100.5       | 9.5        |
| chrXIV@326340to326299   | YNL164C   | IBD2   | attttcATGcca   | 42     | -22                | 2     | 5      | 4               | 201.6          | 157.3       | 16.4       |
| chrXV@758079to758288    | YOR222W   | ODC2   | tattctATGcca   | 210    | 42                 | 2     | 450    | 63              | 424.1          | 215.4       | 9.8        |
| chrXVI@121256to121248   | YPL227C   | ALG5   | aattggATGctg   | 9      | 82                 | 2     | 10     | 3               | 147.3          | 230.7       | 51.2       |
| chrXVI@887843to887829   | YPR173C   | VPS4   | tagtagATGggg   | 15     | -3                 | 2     | 2      | 2               | 116.3          | 162.4       | 45.3       |
| chrII@186489to186457    | YBL018C   | POP8   | tgataaATGgcc   | 33     | -19                | 1     | 2      | 1               | 128.7          | 207.0       | 63.2       |
| chrIII@103401to103342   | YCL011C   | GBP2   | taagctATGggc   | 60     | -15                | 1     | 51     | 1               | 527.4          | 365.0       | 119.6      |
| chrIV@326180to326145    | YDL074C   | BRE1   | gtttttATGcta   | 36     | -3                 | 1     | 16     | 2               | 108.9          | 134.1       | 38.5       |
| chrIV@952778to952843    | YDR245W   | MNN10  | ttgtgcATGtac   | 66     | -48                | 1     | 18     | 5               | 346.8          | 303.3       | 57.6       |
| chrVIII@195404to195448  | YHR045W   |        | cattgaATGgaa   | 45     | 95                 | 1     | 13     | 2               | 103.3          | 122.5       | 16.8       |
| chrX@32049to32105       | YJL213W   |        | ccgttgATGaag   | 57     | 57                 | 1     | 52     | 1               | 109.5          | 115.0       | 0.2        |
| chrXI@482804to482796    | YKR022C   | NTR2   | ctagcaATGtta   | 9      | 15                 | 1     | 2      | 1               | 100.1          | 91.2        | 12.7       |
| chrXIII@914710to914696  | YMR319C   | FET4   | gattcgATGctc   | 15     | 161                | 1     | 8      | 5               | 206.3          | 331.3       | 29.8       |
| chrXIV@349795to349787   | YNL149C   | PGA2   | gaaaagATGtta   | 9      | 30                 | 1     | 2      | 8               | 383.1          | 621.3       | 239.9      |
| chrXIV@297686to297678   | YNL182C   | IPI3   | gggcatATGcgt   | 9      | 50                 | 1     | 2      | 0               | 158.4          | 184.9       | 38.6       |
| chrXIV@80281to80240     | YNL294C   | RIM21  | cactcgATGaatt  | 42     | -19                | 1     | 7      | 2               | 103.5          | 103.8       | 5.4        |
| chrXIV@715464to715441   | YNR050C   | LYS9   | aattacATGgga   | 24     | 52                 | 1     | 3      | 3               | 104.6          | 157.6       | 136.2      |
| chrXV@516850to516449    | YOR103C   | OST2   | gaatacATGact   | 402    | -392               | 1     | 7      | 23              | 317.7          | 336.2       | 145.1      |
| chrII@595918to595929    | YBR183W   | YPC1   | ttatataATGtct  | 12     | 180                | 0     | 2      | 3               | 128.2          | 50.0        | 6.5        |
| chrIV@1206467to1206441  | YDR365C   | ESF1   | agcataATGgta   | 27     | 67                 | 0     | 29     | 1               | 176.5          | 250.2       | 64.3       |
| chrIV@1498206to1498298  | YDR531W   |        | gagtgATGcga    | 93     | -75                | 0     | 9      | 0               | 155.8          | 177.1       | 43.4       |
| chrV@562644to562603     | YER186C   |        | tagtatATGatc   | 42     | -16                | 0     | 21     | 0               | 190.3          | 135.0       | 0.9        |
| chrVII@506934to506957   | YGR007W   | MUQ1   | agacaaATGctt   | 24     | 15                 | 0     | 2      | 0               | 100.1          | 134.3       | 55.5       |
| chrX@181831to181781     | YJL127C-B |        | agttaaATGtac   | 51     | 75                 | 0     | 15     | 0               | 162.3          | 307.3       | 67.9       |
| chrX@32115to32153       | YJL213W   |        | acagtcATGtcc   | 39     | 9                  | 0     | 5      | 1               | 109.5          | 115.0       | 0.2        |
| chrX@32088to32105       | YJL213W   |        | gtaagtATGtca   | 18     | 57                 | 0     | 29     | 1               | 109.5          | 115.0       | 0.2        |
| chrXII@346545to346583   | YLR104W   |        | ataggcATGggt   | 39     | 2                  | 0     | 10     | 0               | 115.5          | 129.3       | 39.4       |
| chrXII@541653to541648   | YLR194C   |        | ataagtATGtaa   | 6      | 74                 | 0     | 2      | 2               | 121.7          | 82.8        | 52.4       |
| chrXIII@337775to337783  | YMR033W   | ARP9   | tactatATGcat   | 9      | 3                  | 0     | 4      | 4               | 215.7          | 154.8       | 42.5       |
| chrXIII@806529to806482  | YMR270C   | RRN9   | atattgATGtgt   | 48     | 61                 | 0     | 15     | 0               | 101.0          | 145.5       | 11.1       |
| chrXV@21323to21312      | YOL158C   | ENB1   | tcgtgaATGtct   | 12     | 3                  | 0     | 2      | 0               | 114.4          | 164.9       | 22.6       |
| chrXV@758206to758232    | YOR222W   | ODC2   | ctcgacATGcat   | 27     | 98                 | 0     | 40     | 63              | 424.1          | 215.4       | 9.8        |
| chrXV@758170to758232    | YOR222W   | ODC2   | ttgttgATGact   | 63     | 98                 | 0     | 94     | 63              | 424.1          | 215.4       | 9.8        |
| chrXV@758066to758170    | YOR222W   | ODC2   | ctacgaATGcta   | 105    | 160                | 0     | 269    | 63              | 424.1          | 215.4       | 9.8        |
| chrXV@758046to758054    | YOR222W   | ODC2   | tctaacATGaaa   | 9      | 276                | 0     | 15     | 63              | 424.1          | 215.4       | 9.8        |
| chrXVI@277546to277514   | YPL146C   | NOP53  | acgttaATGaatt  | 33     | -13                | 0     | 4      | 3               | 100.1          | 174.0       | 136.7      |
| chrXVI@729780to729797   | YPR100W   | MRPL51 | gaatataATGgag  | 18     | -9                 | 0     | 2      | 4               | 333.8          | 196.5       | 116.4      |

**Table S4.** uORFs in abundant mRNAs. All uORFs in 5' UTRs with abundant messages are listed, as in table S3, sorted by the number of ribosome footprints observed.

**Table S5: All Translated uORFs**

| uORF                   | CDS       | Gene   | Initiator Site | Length | uORF end to CDS | # Rib | # mRNA | 5' UTR # Rib | 5' UTR mRNA | CDS mRNA | CDS Rib |
|------------------------|-----------|--------|----------------|--------|-----------------|-------|--------|--------------|-------------|----------|---------|
| chrV@140123to140112    | YEL009C   | GCN4   | tgaaaaATGgct   | 12     | 350             | 698   | 25     | 878          | 407.8       | 614.3    | 38.4    |
| chrXI@100534to100554   | YKL182W   | FAS1   | tcttatATGctc   | 21     | 121             | 187   | 6      | 302          | 76.2        | 86.3     | 345.0   |
| chrXIII@653981to654010 | YMR195W   | ICY1   | aaactaATGaca   | 30     | 22              | 108   | 40     | 110          | 245.5       | 471.6    | 110.6   |
| chrXIII@164343to164233 | YML056C   | IMD4   | caaatcATGctt   | 111    | 58              | 38    | 174    | 66           | 201.6       | 583.5    | 304.6   |
| chrXIII@164274to164233 | YML056C   | IMD4   | gaaaaaATGgtg   | 42     | 58              | 35    | 131    | 66           | 201.6       | 583.5    | 304.6   |
| chrXIII@38099to38155   | YML116W   | ATR1   | tataaaATGaata  | 57     | 40              | 35    | 27     | 33           | 98.0        | 105.0    | 8.5     |
| chrIV@548367to548356   | YDR045C   | RPC11  | cgttatATGgct   | 12     | 49              | 32    | 18     | 34           | 333.2       | 352.7    | 117.6   |
| chrXV@74297to74314     | YOL130W   | ALR1   | ttctacATGgaa   | 18     | 85              | 32    | 3      | 38           | 83.6        | 89.9     | 22.6    |
| chrXV@299638to299721   | YOL014W   |        | gtgagaATGtct   | 84     | -28             | 31    | 35     | 38           | 117.3       | 159.9    | 6.0     |
| chrXIII@38108to38155   | YML116W   | ATR1   | aataaaATGcat   | 48     | 40              | 29    | 23     | 33           | 98.0        | 105.0    | 8.5     |
| chrII@423096to423061   | YBR086C   | IST2   | cgatttATGgct   | 36     | 27              | 28    | 7      | 36           | 23.4        | 46.0     | 57.3    |
| chrXII@404201to404145  | YLR130C   | ZRT2   | ctatatATGatg   | 57     | 83              | 28    | 44     | 29           | 200.3       | 281.1    | 12.3    |
| chrXII@404198to404145  | YLR130C   | ZRT2   | tatatgATGata   | 54     | 83              | 28    | 44     | 29           | 200.3       | 281.1    | 12.3    |
| chrII@602514to602531   | YBR187W   | GDT1   | acgtttATGaaa   | 18     | 97              | 24    | 29     | 10           | 327.0       | 420.0    | 144.9   |
| chrXIV@342136to341912  | YNL156C   | NSG2   | acattgATGata   | 225    | -57             | 24    | 105    | 27           | 136.1       | 195.8    | 35.2    |
| chrXVI@453197to453180  | YPL057C   | SUR1   | cttcgcATGttt   | 18     | 127             | 24    | 7      | 29           | 31.8        | 27.8     | 26.9    |
| chrXIV@250338to250318  | YNL211C   |        | aagaatATGttt   | 21     | 3               | 23    | 7      | 23           | 90.4        | 92.9     | 25.1    |
| chrXIV@200482to201933  | YNL239W   | LAP3   | tgttacATGctt   | 1452   | -1364           | 22    | 13     | 29           | 33.8        | 46.9     | 80.4    |
| chrXV@894188to894135   | YOR307C   | SLY41  | ttatatATGcaa   | 54     | 47              | 22    | 9      | 32           | 39.2        | 73.3     | 18.3    |
| chrVIII@364203to364171 | YHR129C   | ARP1   | gagtacATGcta   | 33     | 16              | 21    | 5      | 22           | 12.3        | 35.5     | 8.4     |
| chrIV@1135874to1135942 | YDR334W   | SWR1   | aaatTTATGaata  | 69     | -16             | 19    | 6      | 21           | 25.8        | 20.9     | 6.5     |
| chrXII@642601to642621  | YLR253W   |        | agttgaATGttt   | 21     | 7               | 19    | 7      | 20           | 52.6        | 64.2     | 10.6    |
| chrXIII@241727to241701 | YML016C   | PPZ1   | caatacATGtta   | 27     | 166             | 19    | 35     | 29           | 154.1       | 62.2     | 19.1    |
| chrXIV@350856to350897  | YNL147W   | LSM7   | atacgcATgtac   | 42     | 44              | 19    | 22     | 24           | 59.1        | 199.1    | 244.2   |
| chrXV@256489to256527   | YOL036W   |        | gcctatATGccc   | 39     | 216             | 19    | 8      | 24           | 33.4        | 34.8     | 17.2    |
| chrXV@441433to441450   | YOR061W   | CKA2   | gtttgtATGatt   | 18     | 85              | 19    | 5      | 32           | 110.3       | 164.0    | 86.8    |
| chrVIII@364197to364171 | YHR129C   | ARP1   | atgctaATGcta   | 27     | 16              | 18    | 1      | 22           | 12.3        | 35.5     | 8.4     |
| chrXV@682183to682163   | YOR185C   | GSP2   | ttcttgATGgaa   | 21     | 57              | 18    | 2      | 20           | 7.7         | 23.2     | 30.4    |
| chrXV@741632to738924   | YOR211C   | MGM1   | gaaagcATGagt   | 2709   | -2645           | 18    | 10     | 23           | 21.4        | 28.6     | 19.5    |
| chrXV@796855to796787   | YOR246C   |        | aagacaATGggt   | 69     | -6              | 18    | 63     | 16           | 257.5       | 334.9    | 26.9    |
| chrIII@160424to160374  | YCR023C   |        | aaaggaATGcta   | 51     | 6               | 17    | 10     | 17           | 40.1        | 47.6     | 9.8     |
| chrIV@222371to222394   | YDL133W   |        | aagtgaATGata   | 24     | 32              | 17    | 10     | 18           | 95.5        | 130.3    | 13.8    |
| chrXIII@325506to325477 | YMR026C   | PEX12  | ttttgcATGaag   | 30     | 44              | 17    | 9      | 20           | 65.4        | 86.8     | 8.4     |
| chrXV@324962to325054   | YOL001W   | PHO80  | aatctaATGccc   | 93     | 195             | 17    | 42     | 29           | 59.4        | 38.1     | 4.0     |
| chrII@164851to164822   | YBL029C-A |        | gaataaATGtca   | 30     | 48              | 16    | 10     | 17           | 55.8        | 89.3     | 35.9    |
| chrX@153049to153023    | YJL139C   | YUR1   | aatctaATGctt   | 27     | 28              | 16    | 3      | 0            | 36.9        | 44.9     | 8.0     |
| chrXII@371317to371514  | YLR113W   | HOG1   | ccctacATGgct   | 198    | 106             | 16    | 165    | 22           | 205.5       | 221.1    | 60.1    |
| chrXII@528248to528277  | YLR188W   | MDL1   | acttacATGaga   | 30     | 24              | 16    | 5      | 16           | 27.6        | 32.1     | 17.1    |
| chrXII@641350to641487  | YLR251W   | SYM1   | agtgatATGata   | 138    | -22             | 16    | 35     | 15           | 62.3        | 83.7     | 4.8     |
| chrXV@889009to889056   | YOR305W   |        | taaaacATGata   | 48     | -37             | 16    | 2      | 21           | 121.7       | 172.3    | 18.9    |
| chrXV@894198to894160   | YOR307C   | SLY41  | tattatATGctt   | 39     | 72              | 16    | 7      | 32           | 39.2        | 73.3     | 18.3    |
| chrII@207174to207191   | YBL009W   | ALK2   | acatacATGcgc   | 18     | 5               | 15    | 2      | 8            | 11.1        | 16.8     | 21.5    |
| chrIV@104619to104605   | YDL198C   | GGC1   | cttttgATGggt   | 15     | 54              | 15    | 5      | 16           | 40.4        | 52.9     | 72.7    |
| chrXVI@222867to222811  | YPL174C   | NIP100 | actcatATGctg   | 57     | 40              | 15    | 9      | 15           | 15.1        | 22.0     | 1.2     |
| chrVII@834511to834491  | YGR168C   |        | gagctaATGaga   | 21     | 5               | 14    | 6      | 15           | 60.7        | 84.5     | 3.8     |

*Continued on next page*

Table S5: All Translated uORFs, continued

| uORF                   | CDS       | Gene   | Initiator Site | Length | uORF end<br>to CDS | # Rib | # mRNA | 5' UTR<br># Rib | 5' UTR<br>mRNA | CDS<br>mRNA | CDS<br>Rib |
|------------------------|-----------|--------|----------------|--------|--------------------|-------|--------|-----------------|----------------|-------------|------------|
| chrXI@317306to317335   | YKL064W   | MNR2   | catttgATGact   | 30     | 72                 | 14    | 6      | 16              | 36.3           | 25.9        | 13.8       |
| chrXVI@222852to222811  | YPL174C   | NIP100 | gacttttATGttg  | 42     | 40                 | 14    | 7      | 15              | 15.1           | 22.0        | 1.2        |
| chrIV@1488995to1488981 | YDR524C   | AGE1   | ttctggATGttc   | 15     | 0                  | 13    | 2      | 13              | 34.2           | 21.3        | 10.4       |
| chrIX@301347to301321   | YIL029C   |        | gcagttATGcaa   | 27     | 67                 | 13    | 15     | 16              | 66.8           | 72.0        | 0.5        |
| chrXII@846060to846104  | YLR360W   | VPS38  | gaattgATGggt   | 45     | -3                 | 13    | 8      | 13              | 58.9           | 68.8        | 7.6        |
| chrXIII@784306to784298 | YMR258C   |        | gctcacATGata   | 9      | 19                 | 13    | 1      | 13              | 55.2           | 78.7        | 12.0       |
| chrXIV@548062to548103  | YNL042W   | BOP3   | cattacATGgaa   | 42     | -3                 | 13    | 4      | 13              | 23.6           | 21.3        | 8.0        |
| chrXV@129156to129179   | YOL100W   | PKH2   | atcttgATGaac   | 24     | 57                 | 13    | 2      | 14              | 12.5           | 13.6        | 6.1        |
| chrII@143191to143238   | YBL039W-B |        | agagcgATGaa    | 48     | 157                | 12    | 7      | 15              | 71.7           | 80.3        | 18.1       |
| chrIV@1468513to1468463 | YDR508C   | GNP1   | tgctttATGttt   | 51     | 28                 | 12    | 24     | 12              | 91.4           | 196.8       | 116.4      |
| chrVII@14812to14934    | YGL256W   | ADH4   | gtgatgATGgct   | 123    | -25                | 12    | 19     | 16              | 59.0           | 113.7       | 14.0       |
| chrVII@14809to14934    | YGL256W   | ADH4   | tttggtATGatg   | 126    | -25                | 12    | 23     | 16              | 59.0           | 113.7       | 14.0       |
| chrXII@641375to641437  | YLR251W   | SYM1   | aatgctATGttg   | 63     | 28                 | 12    | 18     | 15              | 62.3           | 83.7        | 4.8        |
| chrXIV@357228to357359  | YNL142W   | MEP2   | ttatcaATGaa    | 132    | 95                 | 12    | 13     | 15              | 23.6           | 18.5        | 1.9        |
| chrII@324008to323898   | YBR043C   | QDR3   | aggcatATGtat   | 111    | -46                | 11    | 26     | 12              | 62.3           | 70.2        | 2.2        |
| chrIV@550626to550573   | YDR046C   | BAP3   | ctattgATGgat   | 54     | 0                  | 11    | 30     | 17              | 129.2          | 125.3       | 44.6       |
| chrV@492114to492106    | YER159C   | BUR6   | agggcaATGcac   | 9      | 154                | 11    | 3      | 7               | 38.2           | 98.5        | 90.9       |
| chrVII@591195to591248  | YGR049W   | SCM4   | atataaATGaga   | 54     | 69                 | 11    | 3      | 12              | 12.3           | 18.0        | 41.2       |
| chrXII@784823to784831  | YLR328W   | NMA1   | atctgcATGgta   | 9      | 81                 | 11    | 1      | 18              | 31.7           | 51.1        | 48.1       |
| chrXV@106577to106588   | YOL112W   | MSB4   | ttacggATGatt   | 12     | 121                | 11    | 4      | 13              | 47.0           | 75.6        | 4.9        |
| chrIV@1189625to1189596 | YDR357C   |        | ttttacATGaaa   | 30     | 37                 | 10    | 23     | 9               | 156.1          | 146.3       | 38.3       |
| chrIV@1249891to1249820 | YDR387C   |        | tagtccATGgtc   | 72     | 8                  | 10    | 12     | 10              | 38.1           | 53.0        | 2.5        |
| chrV@13599to13634      | YEL072W   | RMD6   | aacagtATGgat   | 36     | 85                 | 10    | 6      | 8               | 38.2           | 53.1        | 2.7        |
| chrV@254417to254400    | YER050C   | RSM18  | agatgaATGcca   | 18     | 15                 | 10    | 6      | 8               | 87.6           | 210.3       | 81.7       |
| chrVII@371932to371964  | YGL071W   | AFT1   | cgattcATGcta   | 33     | 50                 | 10    | 1      | 12              | 17.4           | 18.2        | 16.4       |
| chrVII@334481to334464  | YGL094C   | PAN2   | ttctgaATGgtg   | 18     | -3                 | 10    | 2      | 16              | 26.9           | 14.7        | 8.0        |
| chrVII@14843to14866    | YGL256W   | ADH4   | ttagctATGaaa   | 24     | 43                 | 10    | 2      | 16              | 59.0           | 113.7       | 14.0       |
| chrIX@137975to137943   | YIL119C   | RPI1   | cagttcATGgta   | 33     | 70                 | 10    | 7      | 10              | 56.1           | 34.1        | 37.8       |
| chrXII@993382to993429  | YLR430W   | SEN1   | ctctgtATGgca   | 48     | 1                  | 10    | 0      | 19              | 8.9            | 11.8        | 11.7       |
| chrXIII@137529to137558 | YML068W   | IT1    | taactgATGaaa   | 30     | -9                 | 10    | 7      | 13              | 77.4           | 63.7        | 3.8        |
| chrXIV@164376to164281  | YNL257C   | SIP3   | agctgcATGagt   | 96     | -39                | 10    | 4      | 10              | 11.6           | 24.6        | 6.4        |
| chrI@158892to158978    | YAR008W   | SEN34  | tcgtatATGgct   | 87     | -12                | 9     | 14     | 10              | 57.5           | 98.9        | 9.9        |
| chrII@642514to642452   | YBR208C   | DUR1,2 | acgcagATGttt   | 63     | 248                | 9     | 48     | 14              | 98.3           | 13.7        | 6.2        |
| chrVII@186027to186113  | YGL169W   | SUA5   | tttttaATGgta   | 87     | -49                | 9     | 9      | 13              | 59.5           | 74.0        | 24.4       |
| chrIX@187689to187672   | YIL094C   | LYS12  | gtatctATGcga   | 18     | 44                 | 9     | 22     | 2               | 233.7          | 368.3       | 155.1      |
| chrXI@359687to359740   | YKL041W   | VPS24  | atatatATGtat   | 54     | 45                 | 9     | 20     | 9               | 53.8           | 130.2       | 59.7       |
| chrXV@65546to65554     | YOL137W   | BSC6   | tctaaaATGcta   | 9      | 66                 | 9     | 2      | 9               | 20.5           | 30.5        | 18.2       |
| chrXVI@410387to410494  | YPL076W   | GPI2   | tttcgtATGacc   | 108    | -55                | 9     | 8      | 9               | 22.9           | 22.5        | 10.0       |
| chrII@326071to326063   | YBR044C   | TCM62  | tctcttATGctt   | 9      | 6                  | 8     | 4      | 9               | 57.8           | 63.2        | 8.9        |
| chrII@723227to723286   | YBR253W   | SRB6   | attgtgATGata   | 60     | -22                | 8     | 35     | 8               | 239.0          | 152.4       | 47.1       |
| chrVII@605529to605506  | YGR057C   | LST7   | gtttaaATGggt   | 24     | 2                  | 8     | 2      | 8               | 28.2           | 87.9        | 7.3        |
| chrVIII@506290to506316 | YHR204W   | MNL1   | atttccATGgat   | 27     | 2                  | 8     | 5      | 8               | 17.9           | 64.5        | 5.3        |
| chrVIII@506271to506345 | YHR204W   | MNL1   | gtaaccATGata   | 75     | -27                | 8     | 9      | 8               | 17.9           | 64.5        | 5.3        |
| chrX@160592to160600    | YJL133W   | MRS3   | atatttATGtta   | 9      | 15                 | 8     | 3      | 15              | 49.1           | 110.8       | 20.5       |
| chrX@452309to452359    | YJR008W   |        | gataacATGcgg   | 51     | 63                 | 8     | 9      | 8               | 22.3           | 32.4        | 1.6        |
| chrXI@231809to231820   | YKL109W   | HAP4   | attttaATGggt   | 12     | 50                 | 8     | 1      | 12              | 2.6            | 9.9         | 12.5       |

Continued on next page



Table S5: All Translated uORFs, continued

| uORF                   | CDS     | Gene   | Initiator Site | Length | uORF end<br>to CDS | # Rib | # mRNA | 5' UTR<br># Rib | 5' UTR<br>mRNA | CDS<br>mRNA | CDS<br>Rib |
|------------------------|---------|--------|----------------|--------|--------------------|-------|--------|-----------------|----------------|-------------|------------|
| chrXIV@349790to349767  | YNL149C | PGA2   | gatgttATGaag   | 24     | 10                 | 8     | 23     | 8               | 383.1          | 621.3       | 239.9      |
| chrXVI@467154to467189  | YPL045W | VPS16  | tcacctATGatt   | 36     | 67                 | 8     | 3      | 5               | 16.7           | 38.0        | 7.7        |
| chrIV@592335to592400   | YDR073W | SNF11  | ccgtttATGata   | 66     | 35                 | 7     | 5      | 7               | 30.5           | 32.1        | 22.6       |
| chrIV@1421091to1421102 | YDR483W | KRE2   | cattttATGaag   | 12     | 46                 | 7     | 3      | 4               | 70.7           | 226.6       | 150.9      |
| chrVII@436907to436839  | YGL032C | AGA2   | tctagaATGatt   | 69     | 2                  | 7     | 9      | 12              | 38.1           | 71.5        | 87.6       |
| chrXII@168999to169073  | YLR011W | LOT6   | tttgacATGcct   | 75     | 28                 | 7     | 16     | 5               | 62.9           | 40.5        | 16.4       |
| chrXII@183587to183634  | YLR021W | IRC25  | aaaagaATGggc   | 48     | -13                | 7     | 11     | 3               | 64.1           | 87.2        | 35.8       |
| chrXII@444760to444710  | YLR152C |        | ttctacATGtgt   | 51     | 22                 | 7     | 4      | 7               | 17.0           | 20.3        | 1.1        |
| chrXII@534427to534416  | YLR189C | ATG26  | cactttATGcct   | 12     | 22                 | 7     | 2      | 7               | 33.4           | 26.8        | 6.4        |
| chrXII@982818to982829  | YLR425W | TUS1   | actggtATGaac   | 12     | 61                 | 7     | 1      | 13              | 5.5            | 9.7         | 4.6        |
| chrXIII@26809to26889   | YML121W | GTR1   | agttcaATGtg    | 81     | 40                 | 7     | 27     | 7               | 78.4           | 184.4       | 27.8       |
| chrXIV@202258to202299  | YNL238W | KEX2   | tttcatATGcat   | 42     | 129                | 7     | 10     | 14              | 32.0           | 41.8        | 23.5       |
| chrXV@394610to394599   | YOR033C | EXO1   | atctatATGctc   | 12     | 76                 | 7     | 1      | 7               | 38.0           | 56.8        | 5.5        |
| chrXV@891588to891532   | YOR306C | MCH5   | tgcttgATGtac   | 57     | 103                | 7     | 40     | 7               | 111.4          | 155.6       | 7.5        |
| chrII@554434to554267   | YBR157C | ICS2   | aaataaATGaga   | 168    | -36                | 6     | 48     | 6               | 69.2           | 128.7       | 30.8       |
| chrII@620815to620838   | YBR200W | BEM1   | atatggATGcac   | 24     | 28                 | 6     | 3      | 1               | 21.7           | 47.4        | 24.4       |
| chrIV@321654to321640   | YDL076C | RXT3   | aattccATGaca   | 15     | 89                 | 6     | 2      | 11              | 100.1          | 159.2       | 27.9       |
| chrIV@1362719to1362748 | YDR452W | PPN1   | ggttttATGgta   | 30     | 121                | 6     | 3      | 5               | 109.8          | 132.7       | 27.7       |
| chrVII@436945to436904  | YGL032C | AGA2   | ggtgatATGtta   | 42     | 67                 | 6     | 10     | 12              | 38.1           | 71.5        | 87.6       |
| chrVII@253895to253860  | YGL136C | MRM2   | gaagtaATGact   | 36     | -3                 | 6     | 6      | 4               | 43.5           | 77.6        | 4.5        |
| chrVII@634092to634063  | YGR071C |        | tagcatATGtac   | 30     | -3                 | 6     | 1      | 7               | 11.8           | 26.2        | 8.5        |
| chrIX@326039to326083   | YIL014W | MNT3   | catcacATGagt   | 45     | 17                 | 6     | 11     | 6               | 50.8           | 98.7        | 13.3       |
| chrX@535959to536024    | YJR054W |        | cccttgATGatt   | 66     | 24                 | 6     | 14     | 6               | 33.6           | 97.1        | 7.4        |
| chrX@535920to536024    | YJR054W |        | tagaccATGagg   | 105    | 24                 | 6     | 18     | 6               | 33.6           | 97.1        | 7.4        |
| chrXIII@251525to251496 | YML009C | MRPL39 | atatttATGtgc   | 30     | -19                | 6     | 8      | 6               | 357.6          | 217.0       | 197.6      |
| chrXIII@16759to16673   | YML128C | MSC1   | cctagcATGatt   | 87     | -3                 | 6     | 18     | 6               | 42.6           | 42.2        | 6.8        |
| chrXIV@483399to483407  | YNL076W | MKS1   | atttgaATGatc   | 9      | 149                | 6     | 3      | 11              | 44.1           | 44.5        | 13.3       |
| chrXIV@287772to288038  | YNL187W |        | acatagATGgta   | 267    | -43                | 6     | 21     | 6               | 19.1           | 19.4        | 1.0        |
| chrXIV@280399to280419  | YNL191W | DUG3   | atttgaATGtat   | 21     | 13                 | 6     | 3      | 6               | 34.5           | 43.2        | 18.6       |
| chrXV@292117to292067   | YOL018C | TLG2   | caattgATGtac   | 51     | -7                 | 6     | 11     | 6               | 56.1           | 94.3        | 24.0       |
| chrXV@432120to432131   | YOR057W | SGT1   | agcactATGaca   | 12     | 56                 | 6     | 0      | 4               | 53.9           | 73.5        | 35.5       |
| chrXVI@375458to375484  | YPL091W | GLR1   | cttcataATGtat  | 27     | 14                 | 6     | 14     | 7               | 89.0           | 179.1       | 130.2      |
| chrXVI@267567to267520  | YPL151C | PRP46  | cggaggATGcag   | 48     | -13                | 6     | 4      | 6               | 22.9           | 64.3        | 9.4        |
| chrXVI@150245to150219  | YPL214C | THI6   | ctaaccATGggt   | 27     | 30                 | 6     | 5      | 0               | 45.5           | 46.7        | 6.1        |
| chrXVI@682192to682197  | YPR067W | ISA2   | ttgtacATGtga   | 6      | 19                 | 6     | 1      | 11              | 68.8           | 30.4        | 21.4       |
| chrI@129038to128994    | YAL014C | SYN8   | aaatagATGcgt   | 45     | -25                | 5     | 3      | 8               | 64.4           | 47.3        | 20.4       |
| chrI@179999to179940    | YAR023C |        | ttaaacATGcaa   | 60     | 123                | 5     | 6      | 7               | 31.9           | 29.9        | 1.5        |
| chrII@792794to792817   | YBR295W | PCA1   | ttcgagATGcct   | 24     | 25                 | 5     | 1      | 7               | 4.0            | 7.5         | 1.3        |
| chrIV@345018to344965   | YDL059C | RAD59  | tagcacATGcct   | 54     | 13                 | 5     | 11     | 5               | 38.9           | 44.3        | 8.9        |
| chrIV@192698to192709   | YDL146W | LDB17  | taacttATGtca   | 12     | 41                 | 5     | 3      | 6               | 45.2           | 22.8        | 5.3        |
| chrIV@90141to90170     | YDL206W |        | ttgtaaATGcta   | 30     | 6                  | 5     | 3      | 2               | 30.8           | 17.8        | 1.6        |
| chrIV@829564to829596   | YDR183W | PLP1   | acgtatATGaag   | 33     | -15                | 5     | 2      | 7               | 44.5           | 55.9        | 35.0       |
| chrIV@946732to946863   | YDR242W | AMD2   | ttttcaATGggg   | 132    | -61                | 5     | 8      | 6               | 13.4           | 27.5        | 1.1        |
| chrIV@946642to946863   | YDR242W | AMD2   | gataatATGata   | 222    | -61                | 5     | 11     | 6               | 13.4           | 27.5        | 1.1        |
| chrIV@1019266to1019328 | YDR279W | RNH202 | tggttaATGatt   | 63     | 35                 | 5     | 9      | 6               | 29.7           | 73.7        | 24.8       |
| chrV@213414to213896    | YER030W | CHZ1   | caatacATGgaa   | 483    | -461               | 5     | 1      | 5               | 58.4           | 171.8       | 179.5      |

Continued on next page

Table S5: All Translated uORFs, continued

| uORF                    | CDS     | Gene  | Initiator Site | Length | uORF end<br>to CDS | # Rib | # mRNA | 5' UTR<br># Rib | 5' UTR<br>mRNA | CDS<br>mRNA | CDS<br>Rib |
|-------------------------|---------|-------|----------------|--------|--------------------|-------|--------|-----------------|----------------|-------------|------------|
| chrVI@246094to246135    | YFR048W | RMD8  | ttgcatATGgag   | 42     | -3                 | 5     | 9      | 5               | 48.7           | 41.4        | 11.7       |
| chrVI@246080to246142    | YFR048W | RMD8  | gttcgtATGcaa   | 63     | -10                | 5     | 11     | 5               | 48.7           | 41.4        | 11.7       |
| chrVII@830469to830498   | YGR166W | KRE11 | ctctatATGgac   | 30     | 21                 | 5     | 1      | 7               | 11.8           | 25.9        | 8.3        |
| chrVII@1007366to1007340 | YGR257C | MTM1  | aatcgtATGgac   | 27     | 30                 | 5     | 9      | 5               | 83.7           | 93.9        | 8.8        |
| chrX@352369to352389     | YJL046W |       | tctttgATGttt   | 21     | -9                 | 5     | 10     | 0               | 66.8           | 58.8        | 6.5        |
| chrXI@402164to402238    | YKL019W | RAM2  | ttaattATGgta   | 75     | -28                | 5     | 9      | 10              | 71.8           | 79.2        | 24.7       |
| chrXI@334666to334631    | YKL056C | TMA19 | tggttaATGttt   | 36     | 73                 | 5     | 18     | 6               | 1645.3         | 6368.8      | 4929.3     |
| chrXI@334653to334582    | YKL056C | TMA19 | cattcaATGggt   | 72     | 24                 | 5     | 234    | 6               | 1645.3         | 6368.8      | 4929.3     |
| chrXI@193093to193070    | YKL133C |       | attgtaATGgag   | 24     | 2                  | 5     | 2      | 5               | 8.0            | 21.4        | 2.1        |
| chrXIII@77220to77237    | YML098W | TAF13 | tgcaacATGaaa   | 18     | 29                 | 5     | 3      | 4               | 41.1           | 114.4       | 35.0       |
| chrXIV@507721to507837   | YNL063W | MTQ1  | agttgaATGgta   | 117    | -79                | 5     | 3      | 8               | 26.9           | 44.4        | 5.7        |
| chrXIV@181092to181051   | YNL249C | MPA43 | ttaaaaATGtat   | 42     | 29                 | 5     | 5      | 5               | 17.1           | 53.8        | 2.9        |
| chrXV@1023258to1023172  | YOR363C | PIP2  | gagcggATGaaa   | 87     | -37                | 5     | 1      | 4               | 12.1           | 16.4        | 3.0        |
| chrXVI@506647to506679   | YPL022W | RAD1  | tgctaaATGtgt   | 33     | 15                 | 5     | 5      | 5               | 21.6           | 40.0        | 3.7        |
| chrXVI@272857to272813   | YPL148C | PPT2  | tttctaATGaac   | 45     | 0                  | 5     | 24     | 5               | 84.5           | 63.8        | 3.9        |
| chrXVI@163651to163535   | YPL206C | PGC1  | ttgttgATGtta   | 117    | -60                | 5     | 19     | 4               | 100.1          | 125.0       | 76.3       |

**Table S5.** Translated uORFs. All uORFs with at least 1 rpM ribosome footprint occupancy are listed, as in table S3, sorted by the number of ribosome footprints observed.

**Table S6: Translated Non-AUG uORFs**

| uORF                   | CDS     | Gene   | Initiator Site | Length | uORF end to CDS | # Rib | # mRNA | 5' UTR # Rib | 5' UTR mRNA | CDS mRNA | CDS Rib |
|------------------------|---------|--------|----------------|--------|-----------------|-------|--------|--------------|-------------|----------|---------|
| chrXV@619757to619789   | YOR153W | PDR5   | aataaaTTGgca   | 33     | 51              | 420   | 36     | 497          | 256.5       | 300.7    | 321.0   |
| chrVII@482724to482689  | YGL008C | PMA1   | aagaaaATCatt   | 36     | 19              | 247   | 73     | 324          | 811.1       | 807.6    | 2063.5  |
| chrXI@100392to100544   | YKL182W | FAS1   | ataaaaAAGtac   | 153    | 131             | 196   | 82     | 302          | 76.2        | 86.3     | 345.0   |
| chrIII@262605to262417  | YCR084C | TUP1   | gaacaaCTGgct   | 189    | -31             | 171   | 29     | 172          | 36.6        | 34.4     | 85.2    |
| chrII@483429to481357   | YBR121C | GRS1   | gaaaaaTTGtcg   | 2073   | -2003           | 99    | 113    | 103          | 363.6       | 429.2    | 320.8   |
| chrXIII@56653to56730   | YML106W | URA5   | ttcaaaATTtcc   | 78     | 42              | 90    | 204    | 134          | 516.0       | 564.8    | 402.1   |
| chrXVI@279829to279716  | YPL145C | KES1   | tatacaTTGgat   | 114    | 19              | 75    | 132    | 83           | 231.1       | 221.9    | 142.6   |
| chrXVI@857308to857493  | YPR159W | KRE6   | taaaaATTTttt   | 186    | 85              | 75    | 71     | 84           | 84.4        | 99.4     | 93.1    |
| chrXVI@279818to279723  | YPL145C | KES1   | tagaaaCTGgct   | 96     | 26              | 65    | 104    | 83           | 231.1       | 221.9    | 142.6   |
| chrXVI@732296to732307  | YPR103W | PRE2   | atataaTTGaat   | 12     | 39              | 59    | 21     | 61           | 243.4       | 355.9    | 160.2   |
| chrXVI@829826to829894  | YPR149W | NCE102 | ataaacATTtct   | 69     | 19              | 58    | 65     | 83           | 230.0       | 286.7    | 652.8   |
| chrVII@856374to855268  | YGR180C | RNR4   | taaaaaATTgct   | 1107   | -1037           | 51    | 49     | 67           | 139.5       | 468.5    | 734.9   |
| chrXVI@279766to279716  | YPL145C | KES1   | acagaaATAtat   | 51     | 19              | 49    | 51     | 83           | 231.1       | 221.9    | 142.6   |
| chrXVI@261057to260971  | YPL154C | PEP4   | aacaaaAAGtat   | 87     | 42              | 46    | 37     | 54           | 81.0        | 121.1    | 242.9   |
| chrXVI@875279to875338  | YPR165W | RHO1   | aacaaaATTaata  | 60     | 25              | 44    | 157    | 68           | 537.7       | 722.2    | 392.8   |
| chrVII@180343to180176  | YGL173C | KEM1   | taaaaCTGttt    | 168    | 58              | 43    | 18     | 58           | 22.7        | 35.5     | 120.0   |
| chrXIV@91928to92056    | YNL287W | SEC21  | tacaaaATAact   | 129    | -63             | 43    | 13     | 53           | 50.6        | 84.7     | 132.4   |
| chrXIV@718707to718462  | YNR051C | BRE5   | taagatATTgct   | 246    | 134             | 39    | 94     | 68           | 68.5        | 81.7     | 50.4    |
| chrXIII@164391to164233 | YML056C | IMD4   | aaaaaaCTGaaa   | 159    | 58              | 38    | 176    | 66           | 201.6       | 583.5    | 304.6   |
| chrXV@74287to74436     | YOL130W | ALR1   | tataaaATAttt   | 150    | -37             | 37    | 49     | 38           | 83.6        | 89.9     | 22.6    |
| chrXVI@875296to875325  | YPR165W | RHO1   | aaaagaATCgct   | 30     | 38              | 35    | 111    | 68           | 537.7       | 722.2    | 392.8   |
| chrXV@74289to74318     | YOL130W | ALR1   | taaaaATTTtct   | 30     | 81              | 34    | 9      | 38           | 83.6        | 89.9     | 22.6    |
| chrIII@120361to120248  | YCR004C | YCP4   | aaaaaaAAGaga   | 114    | -67             | 33    | 21     | 43           | 121.5       | 208.9    | 260.4   |
| chrXII@809945to809962  | YLR342W | FKS1   | aaaaaaATTaaa   | 18     | 34              | 32    | 4      | 62           | 77.8        | 88.9     | 163.1   |
| chrXVI@642172to642192  | YPR035W | GLN1   | acaaaaATTaaa   | 21     | 12              | 32    | 62     | 47           | 1172.2      | 1571.1   | 817.4   |
| chrIV@1168681to1168652 | YDR346C | SVF1   | aaagaaACGaat   | 30     | 0               | 30    | 17     | 47           | 276.4       | 317.3    | 114.9   |
| chrXV@894266to894135   | YOR307C | SLY41  | agaaaaAAGaat   | 132    | 47              | 30    | 27     | 32           | 39.2        | 73.3     | 18.3    |
| chrXIV@91942to91974    | YNL287W | SEC21  | acaaatACGgat   | 33     | 19              | 28    | 6      | 53           | 50.6        | 84.7     | 132.4   |
| chrXIII@556511to556500 | YMR145C | NDE1   | ataataTTGact   | 12     | 27              | 26    | 6      | 27           | 61.6        | 61.3     | 63.0    |
| chrXII@180158to180226  | YLR019W | PSR2   | taagatATAtct   | 69     | 60              | 22    | 26     | 29           | 54.8        | 52.6     | 32.9    |
| chrXI@338475to338419   | YKL054C | DEF1   | aaaaaaATCacc   | 57     | 23              | 21    | 20     | 22           | 78.4        | 89.0     | 307.1   |
| chrXV@123898to123939   | YOL103W | ITR2   | taacaaTTGtcg   | 42     | 61              | 21    | 15     | 29           | 83.3        | 121.0    | 18.7    |
| chrVII@650718to650599  | YGR086C | PIL1   | aagaaaATTtgt   | 120    | -21             | 20    | 61     | 23           | 137.8       | 220.1    | 558.8   |
| chrXII@699575to699546  | YLR277C | YSH1   | gaacaaTTGtat   | 30     | 50              | 20    | 5      | 24           | 37.6        | 45.4     | 12.7    |
| chrXIII@701140to701090 | YMR216C | SKY1   | tcaaaaTTGtta   | 51     | 53              | 20    | 9      | 28           | 30.3        | 41.6     | 28.6    |
| chrIV@465871to465918   | YDR011W | SNQ2   | aaaaaaGTGgat   | 48     | -3              | 19    | 3      | 31           | 23.3        | 39.1     | 36.6    |
| chrVIII@385295to385378 | YHR143W | DSE1   | gaacaaAAGaat   | 84     | 134             | 19    | 95     | 38           | 216.9       | 239.3    | 318.7   |
| chrIV@1263292to1263339 | YDR395W | SXM1   | acaacaAAGgag   | 48     | -24             | 18    | 5      | 26           | 55.6        | 90.0     | 72.1    |
| chrVIII@121740to121708 | YHR007C | ERG11  | gaaaaaATTttt   | 33     | 31              | 18    | 87     | 31           | 346.1       | 365.5    | 262.8   |
| chrXII@574000to574149  | YLR219W | MSC3   | aataaaTTGctt   | 150    | 3               | 18    | 13     | 18           | 17.8        | 13.5     | 15.1    |
| chrXV@682193to682173   | YOR185C | GSP2   | taacaaATAatt   | 21     | 67              | 18    | 2      | 20           | 7.7         | 23.2     | 30.4    |
| chrVII@257631to257675  | YGL133W | ITC1   | tttacaATTact   | 45     | 36              | 17    | 4      | 23           | 11.2        | 18.0     | 8.6     |
| chrVIII@383500to383538 | YHR142W | CHS7   | tcaaaaATTgtg   | 39     | 2               | 17    | 23     | 19           | 96.6        | 167.9    | 38.5    |
| chrVIII@383455to383538 | YHR142W | CHS7   | tcaaagCTGtct   | 84     | 2               | 17    | 51     | 19           | 96.6        | 167.9    | 38.5    |
| chrVIII@383412to383600 | YHR142W | CHS7   | taaaaaAAGtca   | 189    | -60             | 17    | 79     | 19           | 96.6        | 167.9    | 38.5    |

*Continued on next page*

Table S6: Translated Non-AUG uORFs, continued

| uORF                   | CDS     | Gene   | Initiator Site | Length | uORF end<br>to CDS | # Rib | # mRNA | 5' UTR<br># Rib | 5' UTR<br>mRNA | CDS<br>mRNA | CDS<br>Rib |
|------------------------|---------|--------|----------------|--------|--------------------|-------|--------|-----------------|----------------|-------------|------------|
| chrXV@894250to894167   | YOR307C | SLY41  | aaaaaaAAGaaa   | 84     | 79                 | 17    | 17     | 32              | 39.2           | 73.3        | 18.3       |
| chrVII@650716to650648  | YGR086C | PIL1   | gaaaatTTGtct   | 69     | 28                 | 16    | 46     | 23              | 137.8          | 220.1       | 558.8      |
| chrXIII@701141to701112 | YMR216C | SKY1   | ttcaaaATTgtt   | 30     | 75                 | 16    | 9      | 28              | 30.3           | 41.6        | 28.6       |
| chrXIV@662784to662897  | YNR017W | TIM23  | aaaaaaAAGacc   | 114    | 17                 | 16    | 65     | 26              | 89.2           | 114.9       | 114.0      |
| chrIII@136961to136884  | YCR011C | ADP1   | ataaaaATTaag   | 78     | 14                 | 15    | 10     | 18              | 50.1           | 89.7        | 32.6       |
| chrVIII@301992to301969 | YHR098C | SFB3   | gaagaaATTagt   | 24     | 33                 | 15    | 4      | 15              | 13.6           | 37.4        | 46.3       |
| chrXI@299069to299197   | YKL072W | STB6   | aaaaaaAAGaag   | 129    | 28                 | 15    | 15     | 22              | 20.0           | 25.8        | 9.8        |
| chrVII@703588to705054  | YGR108W | CLB1   | gccaaaATAttt   | 1467   | -1415              | 14    | 47     | 14              | 184.3          | 256.2       | 28.4       |
| chrVIII@490667to490816 | YHR195W | NVJ1   | caaaaaTTGgaa   | 150    | -70                | 14    | 56     | 15              | 117.5          | 141.3       | 14.3       |
| chrXI@321183to321115   | YKL063C |        | actaaaGTGatt   | 69     | -46                | 14    | 4      | 16              | 72.3           | 124.7       | 89.6       |
| chrXI@278696to278785   | YKL085W | MDH1   | tatacaATAtat   | 90     | -19                | 14    | 31     | 16              | 96.1           | 130.9       | 118.1      |
| chrIV@906928to906848   | YDR219C | MF1    | tacaaaATAtca   | 81     | 1                  | 12    | 11     | 13              | 37.8           | 74.4        | 20.9       |
| chrIV@1434815to1434874 | YDR492W | IZH1   | acaaaaGTGatt   | 60     | 41                 | 12    | 37     | 18              | 70.1           | 85.5        | 37.4       |
| chrVII@761363to761380  | YGR135W | PRE9   | ttataaATTgat   | 18     | 16                 | 12    | 54     | 13              | 431.7          | 516.2       | 216.0      |
| chrVII@888838to888867  | YGR195W | SKI6   | tataaaaAGatt   | 30     | 19                 | 12    | 12     | 18              | 63.7           | 80.3        | 84.6       |
| chrIX@148736to148707   | YIL115C | NUP159 | ataaatATAtat   | 30     | 2                  | 12    | 3      | 13              | 11.0           | 34.7        | 46.9       |
| chrXII@371380to371514  | YLR113W | HOG1   | aaagaaaAGgcc   | 135    | 106                | 12    | 131    | 22              | 205.5          | 221.1       | 60.1       |
| chrXII@982736to982888  | YLR425W | TUS1   | ttcaaaATCcat   | 153    | 2                  | 12    | 5      | 13              | 5.5            | 9.7         | 4.6        |
| chrIII@136928to136884  | YCR011C | ADP1   | aaaaaaATTaata  | 45     | 14                 | 11    | 6      | 18              | 50.1           | 89.7        | 32.6       |
| chrIV@310134to310111   | YDL081C | RPP1A  | tctaaaATAaca   | 24     | -10                | 11    | 194    | 17              | 5627.0         | 5380.7      | 4922.3     |
| chrV@111365to111427    | YEL022W | GEA2   | aataaaCTGatt   | 63     | -7                 | 11    | 3      | 13              | 22.3           | 29.9        | 22.8       |
| chrXIV@87849to87944    | YNL289W | PCL1   | acaaaaACGata   | 96     | -48                | 11    | 15     | 17              | 81.1           | 105.8       | 76.6       |
| chrII@23632to23546     | YBL103C | RTG3   | acaaaaACGaca   | 87     | 12                 | 10    | 23     | 10              | 39.7           | 46.3        | 17.1       |
| chrII@447373to447359   | YBR102C | EXO84  | aacaaaAAGcct   | 15     | 43                 | 10    | 1      | 6               | 4.3            | 15.7        | 21.4       |
| chrIII@94307to94263    | YCL017C | NFS1   | attaaaATAtat   | 45     | -6                 | 10    | 10     | 17              | 57.6           | 61.4        | 96.3       |
| chrIV@906915to906871   | YDR219C | MF1    | aacaaaTTGgcc   | 45     | 24                 | 10    | 9      | 13              | 37.8           | 74.4        | 20.9       |
| chrVIII@512629to514599 | YHR206W | SKN7   | aacgaaATTgct   | 1971   | -1868              | 10    | 15     | 12              | 17.0           | 22.1        | 33.5       |
| chrX@143234to144697    | YJL146W | IDS2   | tcaaatATAttt   | 1464   | -1409              | 10    | 22     | 10              | 70.1           | 44.1        | 11.4       |
| chrX@143200to143295    | YJL146W | IDS2   | gcaaagATAtct   | 96     | -7                 | 10    | 28     | 10              | 70.1           | 44.1        | 11.4       |
| chrXI@205210to205257   | YKL126W | YPK1   | ttagaaTTGggt   | 48     | 93                 | 10    | 20     | 16              | 79.4           | 95.2        | 52.7       |
| chrXI@577816to577742   | YKR072C | SIS2   | aaagaaATAtta   | 75     | -22                | 10    | 10     | 17              | 35.6           | 46.0        | 36.2       |
| chrXIII@560266to560301 | YMR148W |        | tcaagaATAtct   | 36     | 63                 | 10    | 6      | 14              | 24.9           | 27.2        | 19.7       |
| chrXV@558692to558657   | YOR124C | UBP2   | aataaaGTGgta   | 36     | 15                 | 10    | 4      | 11              | 15.2           | 26.2        | 29.4       |
| chrXVI@164164to164253  | YPL204W | HRR25  | agaaaaATAttt   | 90     | 21                 | 10    | 25     | 11              | 56.0           | 80.3        | 52.0       |
| chrIV@135813to135893   | YDL180W |        | ttcaaaATTtct   | 81     | 3                  | 9     | 41     | 11              | 42.9           | 82.5        | 8.1        |
| chrIV@1249882to1249820 | YDR387C |        | gtcaaaaAGtat   | 63     | 8                  | 9     | 12     | 10              | 38.1           | 53.0        | 2.5        |
| chrV@404690to404863    | YER123W | YCK3   | ttaaaaAAGaag   | 174    | -55                | 9     | 23     | 10              | 35.7           | 54.5        | 24.8       |
| chrXV@925548to925685   | YOR326W | MYO2   | acaaaaAAGtct   | 138    | 32                 | 9     | 41     | 13              | 53.5           | 59.1        | 55.7       |
| chrXVI@164190to164267  | YPL204W | HRR25  | taaaaaAAGtcg   | 78     | 7                  | 9     | 14     | 11              | 56.0           | 80.3        | 52.0       |
| chrIV@444621to444731   | YDL003W | MCD1   | caaaaaAGGact   | 111    | -52                | 8     | 18     | 11              | 80.1           | 87.6        | 36.2       |
| chrIV@444620to444715   | YDL003W | MCD1   | acaaaaAAGgac   | 96     | -36                | 8     | 18     | 11              | 80.1           | 87.6        | 36.2       |
| chrIV@576408to576473   | YDR062W | LCB2   | gaaaaaaAAGcat  | 66     | -3                 | 8     | 43     | 9               | 154.6          | 178.7       | 73.7       |
| chrVII@584789to584848  | YGR046W | TAM41  | gtgaaaAAGggt   | 60     | 50                 | 8     | 13     | 9               | 52.4           | 79.4        | 13.3       |
| chrVII@105001to1049946 | YGR279C | SCW4   | tctacaATCggt   | 66     | -18                | 8     | 13     | 11              | 73.9           | 134.5       | 818.0      |
| chrVIII@490666to490704 | YHR195W | NVJ1   | acaaaaATTgga   | 39     | 42                 | 8     | 34     | 15              | 117.5          | 141.3       | 14.3       |
| chrXI@231692to231820   | YKL109W | HAP4   | ataaaaAAGggt   | 129    | 50                 | 8     | 2      | 12              | 2.6            | 9.9         | 12.5       |

Continued on next page

Table S6: Translated Non-AUG uORFs, continued

| uORF                    | CDS       | Gene  | Initiator Site | Length | uORF end<br>to CDS | # Rib | # mRNA | 5' UTR<br># Rib | 5' UTR<br>mRNA | CDS<br>mRNA | CDS<br>Rib |
|-------------------------|-----------|-------|----------------|--------|--------------------|-------|--------|-----------------|----------------|-------------|------------|
| chrXIV@349777to349763   | YNL149C   | PGA2  | gaaaaaCTgccg   | 15     | 6                  | 8     | 23     | 8               | 383.1          | 621.3       | 239.9      |
| chrXVI@812519to812472   | YPR138C   | MEP3  | ttgaaaTTGttt   | 48     | 24                 | 8     | 14     | 10              | 68.1           | 46.4        | 8.5        |
| chrIV@862004to862096    | YDR206W   | EBS1  | aagaaaATAtct   | 93     | -46                | 7     | 12     | 9               | 66.3           | 95.4        | 14.3       |
| chrIV@861927to862037    | YDR206W   | EBS1  | aaaaagAAGgct   | 111    | 13                 | 7     | 35     | 9               | 66.3           | 95.4        | 14.3       |
| chrIV@1013682to1013665  | YDR276C   | PMP3  | aatacaATTgat   | 18     | 27                 | 7     | 14     | 4               | 366.2          | 566.7       | 1074.6     |
| chrIV@1468479to1468432  | YDR508C   | GNP1  | aaaactATCgct   | 48     | -3                 | 7     | 43     | 12              | 91.4           | 196.8       | 116.4      |
| chrV@73703to73786       | YEL042W   | GDA1  | tcaacaATCttt   | 84     | -16                | 7     | 12     | 11              | 26.9           | 53.4        | 103.4      |
| chrV@451296to451261     | YER139C   | RTR1  | tctaaaATAtct   | 36     | 24                 | 7     | 9      | 7               | 51.4           | 72.1        | 19.3       |
| chrVII@548169to548243   | YGR032W   | GSC2  | tacaaaAGGatt   | 75     | 24                 | 7     | 3      | 13              | 35.1           | 11.1        | 8.2        |
| chrVII@775101to775169   | YGR143W   | SKN1  | aaagaaACGgta   | 69     | 28                 | 7     | 7      | 11              | 16.5           | 35.1        | 11.6       |
| chrVII@909131to909184   | YGR205W   |       | aataaaATAacg   | 54     | 33                 | 7     | 6      | 13              | 20.4           | 25.2        | 32.3       |
| chrVII@993660to991180   | YGR250C   |       | caaaaaAAGtgt   | 2481   | -2345              | 7     | 11     | 7               | 20.4           | 31.9        | 14.7       |
| chrXII@116369to116419   | YLL015W   | BPT1  | ttagcaGTGgtt   | 51     | 11                 | 7     | 4      | 8               | 15.0           | 22.2        | 13.2       |
| chrXII@932860to932955   | YLR407W   |       | ttcaatATAgct   | 96     | 10                 | 7     | 142    | 8               | 300.0          | 383.2       | 58.7       |
| chrXIII@253814to253843  | YML007W   | YAP1  | cccaaaACGttt   | 30     | 4                  | 7     | 13     | 12              | 110.3          | 83.4        | 39.0       |
| chrXIII@662521to662577  | YMR199W   | CLN1  | gaagaaATTagt   | 57     | 65                 | 7     | 8      | 11              | 27.0           | 40.5        | 30.2       |
| chrXV@304037to303999    | YOL012C   | HTZ1  | gaaaaaATAtcg   | 39     | 16                 | 7     | 7      | 9               | 85.1           | 99.9        | 198.1      |
| chrXV@271472to270633    | YOL028C   | YAP7  | ttgaaaATTgct   | 840    | -737               | 7     | 20     | 9               | 50.6           | 53.9        | 25.6       |
| chrXV@394643to394599    | YOR033C   | EXO1  | caaaaaATAtca   | 45     | 76                 | 7     | 6      | 7               | 38.0           | 56.8        | 5.5        |
| chrXVI@812520to812509   | YPR138C   | MEP3  | tttgaaATTggt   | 12     | 61                 | 7     | 7      | 10              | 68.1           | 46.4        | 8.5        |
| chrII@613925to613884    | YBR196C   | PGI1  | tgcaaaATCgat   | 42     | -10                | 6     | 59     | 7               | 600.8          | 905.7       | 1948.4     |
| chrIV@931086to931178    | YDR234W   | LYS4  | aataaaATAgaa   | 93     | -54                | 6     | 11     | 11              | 56.2           | 74.6        | 47.3       |
| chrVII@634099to631484   | YGR071C   |       | tccgaaATAgca   | 2616   | -2582              | 6     | 2      | 7               | 11.8           | 26.2        | 8.5        |
| chrVII@1027253to1027390 | YGR270W   | YTA7  | agcaaaACGtct   | 138    | -15                | 6     | 10     | 7               | 6.7            | 20.2        | 15.8       |
| chrX@184252to184223     | YJL127C   | SPT10 | gccaaaGTGatt   | 30     | 6                  | 6     | 1      | 6               | 20.8           | 23.3        | 8.1        |
| chrXI@362177to362233    | YKL039W   | PTM1  | ttaaaaATTgaa   | 57     | 31                 | 6     | 14     | 8               | 54.9           | 49.0        | 66.7       |
| chrXII@163920to163894   | YLR006C   | SSK1  | tcaaaaACGaat   | 27     | 3                  | 6     | 2      | 9               | 14.7           | 21.3        | 7.9        |
| chrXV@877711to877676    | YOR298C-A | MBF1  | acaaaaAAGtta   | 36     | -7                 | 6     | 160    | 6               | 1284.1         | 1206.0      | 1385.7     |
| chrXV@978117to978037    | YOR344C   | TYE7  | gcaaaaATAaaa   | 81     | -28                | 6     | 10     | 7               | 111.5          | 84.6        | 81.0       |
| chrXV@978111to978037    | YOR344C   | TYE7  | ataaaaATAaag   | 75     | -28                | 6     | 10     | 7               | 111.5          | 84.6        | 81.0       |
| chrI@33423to33473       | YAL061W   | BDH2  | ataacaATAaat   | 51     | -25                | 5     | 4      | 8               | 8.5            | 15.6        | 6.4        |
| chrII@549040to548945    | YBR154C   | RPB5  | tacaaaATTtgt   | 96     | -57                | 5     | 53     | 9               | 409.0          | 656.9       | 314.4      |
| chrIV@741694to741518    | YDR142C   | PEX7  | gtcgaaATCggt   | 177    | -78                | 5     | 26     | 5               | 50.1           | 44.0        | 4.7        |
| chrIV@946651to946863    | YDR242W   | AMD2  | ataataATAgat   | 213    | -61                | 5     | 11     | 6               | 13.4           | 27.5        | 1.1        |
| chrIV@1171844to1171653  | YDR348C   |       | agaaaaATTgat   | 192    | -165               | 5     | 5      | 10              | 98.2           | 107.6       | 44.8       |
| chrIV@1171843to1171820  | YDR348C   |       | gaaaaaTTGata   | 24     | 2                  | 5     | 4      | 10              | 98.2           | 107.6       | 44.8       |
| chrIV@1296783to1296658  | YDR414C   | ERD1  | tataaaTTGttt   | 126    | -19                | 5     | 47     | 6               | 77.3           | 54.3        | 14.2       |
| chrV@404715to404729     | YER123W   | YCK3  | caagaaTTGtct   | 15     | 79                 | 5     | 2      | 10              | 35.7           | 54.5        | 24.8       |
| chrV@492069to491524     | YER159C   | BUR6  | tacaaaAGGgga   | 546    | -428               | 5     | 20     | 7               | 38.2           | 98.5        | 90.9       |
| chrVI@246088to246135    | YFR048W   | RMD8  | gcaaaaTTGcat   | 48     | -3                 | 5     | 9      | 5               | 48.7           | 41.4        | 11.7       |
| chrVII@472323to469096   | YGL013C   | PDR1  | acagaaaAGaat   | 3228   | -3206              | 5     | 1      | 6               | 8.9            | 15.7        | 12.6       |
| chrVII@962096to962061   | YGR235C   |       | acaaaaATAact   | 36     | -3                 | 5     | 41     | 5               | 287.9          | 176.7       | 63.6       |
| chrVIII@274103to276241  | YHR084W   | STE12 | tcaaacAAGact   | 2139   | -2066              | 5     | 11     | 8               | 20.0           | 26.9        | 29.9       |
| chrX@184289to184230     | YJL127C   | SPT10 | taaaaaGTGtac   | 60     | 13                 | 5     | 6      | 6               | 20.8           | 23.3        | 8.1        |
| chrX@636729to635848     | YJR111C   |       | taaaaaATAcac   | 882    | -851               | 5     | 5      | 5               | 27.2           | 64.5        | 22.9       |
| chrXII@524797to524862   | YLR187W   | SKG3  | acccaaaATTgaa  | 66     | 4                  | 5     | 1      | 10              | 2.9            | 5.1         | 16.0       |

Continued on next page

Table S6: Translated Non-AUG uORFs, continued

| uORF                   | CDS     | Gene  | Initiator Site | Length | uORF end<br>to CDS | # Rib | # mRNA | 5' UTR<br># Rib | 5' UTR<br>mRNA | CDS<br>mRNA | CDS<br>Rib |
|------------------------|---------|-------|----------------|--------|--------------------|-------|--------|-----------------|----------------|-------------|------------|
| chrXIII@647044to647103 | YMR192W | GYL1  | acaacaATTgca   | 60     | 13                 | 5     | 3      | 5               | 8.7            | 19.5        | 21.0       |
| chrXIV@352399to352461  | YNL145W | MFA2  | acaacaATAact   | 63     | -46                | 5     | 51     | 6               | 1211.2         | 974.4       | 1486.6     |
| chrXIV@135602to135495  | YNL271C | BNI1  | ataaaaTTGgac   | 108    | 112                | 5     | 4      | 7               | 7.4            | 10.4        | 11.5       |
| chrXV@68792to67560     | YOL136C | PFK27 | aagaaaAGGgat   | 1233   | -1193              | 5     | 4      | 8               | 37.9           | 54.8        | 18.6       |
| chrXVI@373750to375165  | YPL092W | SSU1  | ttaaaaACGttt   | 1416   | -1376              | 5     | 10     | 9               | 90.4           | 137.7       | 28.3       |
| chrXVI@866470to866414  | YPR161C | SGV1  | aagaaaTTGtat   | 57     | -3                 | 5     | 10     | 5               | 34.1           | 52.6        | 22.0       |

**Table S6.** Translated Non-AUG uORFs. Non-AUG uORFs that we predicted based on initiation context and that were found to be translated experimentally are listed, as in Table S3, sorted by the number of ribosome footprints observed. Many of these uORFs partly or completely overlap each other.

**Table S7: Translational Regulation in Response to Starvation**

| CDS     | Gene  | Trl Change | mRNA Change | Trl NoAA | Trl Rich | # mRNA<br>NoAA | # Rib<br>NoAA | # mRNA<br>Rich | # Rib<br>Rich |
|---------|-------|------------|-------------|----------|----------|----------------|---------------|----------------|---------------|
| YPR169W | JIP5  | 0.150      | 0.786       | 0.083    | 0.548    | 724            | 32            | 1275           | 369           |
| YGR159C | NSR1  | 0.193      | 0.161       | 0.354    | 1.827    | 408            | 77            | 3517           | 3395          |
| YCL037C | SRO9  | 0.220      | 0.363       | 3.212    | 14.496   | 70             | 120           | 267            | 2045          |
| YNL061W | NOP2  | 0.232      | 0.329       | 0.749    | 3.216    | 155            | 62            | 652            | 1108          |
| YCL054W | SPB1  | 0.253      | 0.257       | 0.321    | 1.262    | 286            | 49            | 1540           | 1027          |
| YNL308C | KRI1  | 0.254      | 0.392       | 0.532    | 2.084    | 264            | 75            | 932            | 1026          |
| YDL148C | NOP14 | 0.259      | 0.214       | 0.355    | 1.361    | 206            | 39            | 1332           | 958           |
| YER165W | PAB1  | 0.263      | 0.775       | 3.929    | 14.888   | 711            | 1491          | 1270           | 9990          |
| YMR229C | RRP5  | 0.267      | 0.134       | 1.170    | 4.354    | 205            | 128           | 2111           | 4856          |
| YBR247C | ENP1  | 0.270      | 0.287       | 0.464    | 1.709    | 113            | 28            | 546            | 493           |
| YDR299W | BFR2  | 0.290      | 0.282       | 0.356    | 1.222    | 205            | 39            | 1005           | 649           |
| YOR091W | TMA46 | 0.301      | 0.336       | 0.833    | 2.757    | 117            | 52            | 482            | 702           |
| YPL043W | NOP4  | 0.303      | 0.274       | 0.524    | 1.719    | 218            | 61            | 1103           | 1002          |
| YKR081C | RPF2  | 0.313      | 0.180       | 0.618    | 1.967    | 103            | 34            | 793            | 824           |
| YEL026W | SNU13 | 0.325      | 0.370       | 2.221    | 6.809    | 140            | 166           | 524            | 1885          |
| YDL031W | DBP10 | 0.331      | 0.363       | 0.537    | 1.617    | 265            | 76            | 1010           | 863           |
| YMR128W | ECM16 | 0.335      | 0.215       | 0.639    | 1.897    | 129            | 44            | 832            | 834           |
| YOR310C | NOP58 | 0.347      | 0.236       | 0.839    | 2.404    | 462            | 207           | 2710           | 3442          |
| YDR060W | MAK21 | 0.363      | 0.164       | 0.588    | 1.611    | 169            | 53            | 1423           | 1211          |
| YLR009W | RLP24 | 0.363      | 0.179       | 0.836    | 2.290    | 112            | 50            | 867            | 1049          |
| YNL175C | NOP13 | 0.370      | 0.216       | 0.568    | 1.528    | 211            | 64            | 1355           | 1094          |
| YML093W | UTP14 | 0.376      | 0.245       | 0.546    | 1.447    | 264            | 77            | 1489           | 1138          |
| YCR088W | ABP1  | 0.379      | 3.877       | 6.858    | 17.995   | 728            | 2665          | 260            | 2472          |
| YKR092C | SRP40 | 0.383      | 0.209       | 0.896    | 2.330    | 163            | 78            | 1081           | 1331          |
| YKL210W | UBA1  | 0.385      | 2.707       | 1.482    | 3.830    | 3369           | 2665          | 1723           | 3487          |
| YPL058C | PDR12 | 0.387      | 0.454       | 0.496    | 1.278    | 117            | 31            | 357            | 241           |
| YPL217C | BMS1  | 0.392      | 0.279       | 0.402    | 1.020    | 270            | 58            | 1341           | 723           |
| YBL039C | URA7  | 0.394      | 0.141       | 0.560    | 1.413    | 308            | 92            | 3017           | 2252          |
| YGR142W | BTN2  | 0.394      | 0.464       | 0.636    | 1.605    | 106            | 36            | 316            | 268           |
| YNL300W |       | 0.399      | 1.042       | 3.265    | 8.140    | 70             | 122           | 93             | 400           |
| YLL040C | VPS13 | 0.401      | 2.474       | 3.330    | 8.269    | 436            | 775           | 244            | 1066          |
| YDL153C | SAS10 | 0.402      | 0.222       | 0.336    | 0.831    | 262            | 47            | 1633           | 717           |
| YCL009C | ILV6  | 0.403      | 2.100       | 2.664    | 6.570    | 505            | 718           | 333            | 1156          |
| YKL029C | MAE1  | 0.404      | 0.823       | 1.081    | 2.661    | 369            | 213           | 621            | 873           |
| YKL014C | URB1  | 0.405      | 0.217       | 0.620    | 1.521    | 127            | 42            | 810            | 651           |

*Continued on next page*

Table S7: Translational Regulation in Response to Starvation, continued

| CDS       | Gene   | Tri Change | mRNA Change | Tri NoAA | Tri Rich | # mRNA<br>NoAA | # Rib<br>NoAA | # mRNA<br>Rich | # Rib<br>Rich |
|-----------|--------|------------|-------------|----------|----------|----------------|---------------|----------------|---------------|
| YNL138W   | SRV2   | 0.407      | 3.019       | 4.167    | 10.176   | 857            | 1906          | 393            | 2113          |
| YGL120C   | PRP43  | 0.409      | 0.222       | 0.699    | 1.701    | 185            | 69            | 1156           | 1039          |
| YMR093W   | UTP15  | 0.409      | 0.371       | 0.397    | 0.966    | 198            | 42            | 739            | 377           |
| YHR099W   | TRA1   | 0.410      | 0.838       | 1.326    | 3.222    | 250            | 177           | 413            | 703           |
| YNL241C   | ZWF1   | 0.410      | 6.445       | 2.437    | 5.911    | 1173           | 1526          | 252            | 787           |
| YLR276C   | DBP9   | 0.414      | 0.215       | 0.464    | 1.115    | 198            | 49            | 1276           | 752           |
| YDL126C   | CDC48  | 0.414      | 3.746       | 1.232    | 2.962    | 9118           | 5997          | 3370           | 5274          |
| YER043C   | SAH1   | 0.415      | 1.678       | 5.216    | 12.514   | 1259           | 3505          | 1039           | 6870          |
| YGL009C   | LEU1   | 0.420      | 7.509       | 1.410    | 3.338    | 22631          | 17035         | 4173           | 7360          |
| YBL042C   | FUI1   | 0.422      | 1.628       | 0.420    | 0.990    | 589            | 132           | 501            | 262           |
| YOR377W   | ATF1   | 0.424      | 0.347       | 0.278    | 0.652    | 128            | 19            | 511            | 176           |
| YKL205W   | LOS1   | 0.425      | 0.561       | 0.323    | 0.757    | 371            | 64            | 915            | 366           |
| YFL022C   | FRS2   | 0.427      | 1.283       | 1.923    | 4.485    | 797            | 818           | 860            | 2038          |
| YIL091C   |        | 0.427      | 0.253       | 0.242    | 0.564    | 232            | 30            | 1268           | 378           |
| YML010W   | SPT5   | 0.429      | 1.392       | 1.764    | 4.091    | 908            | 855           | 903            | 1952          |
| YAL038W   | CDC19  | 0.430      | 1.557       | 3.608    | 8.348    | 16312          | 31417         | 14510          | 64000         |
| YJL130C   | URA2   | 0.433      | 2.355       | 3.989    | 9.170    | 2294           | 4885          | 1349           | 6536          |
| YPL093W   | NOG1   | 0.433      | 0.186       | 0.432    | 0.992    | 230            | 53            | 1713           | 898           |
| YOR206W   | NOC2   | 0.434      | 0.219       | 0.527    | 1.207    | 288            | 81            | 1823           | 1163          |
| YCL014W   | BUD3   | 0.434      | 1.278       | 1.572    | 3.601    | 180            | 151           | 195            | 371           |
| YCR073W-A | SOL2   | 0.434      | 3.123       | 1.300    | 2.978    | 291            | 202           | 129            | 203           |
| YLR401C   | DUS3   | 0.436      | 0.304       | 0.468    | 1.069    | 148            | 37            | 673            | 380           |
| YGL071W   | AFT1   | 0.437      | 1.363       | 0.725    | 1.652    | 186            | 72            | 189            | 165           |
| YBR011C   | IPP1   | 0.443      | 2.426       | 4.512    | 10.128   | 2683           | 6462          | 1531           | 8193          |
| YKR054C   | DYN1   | 0.444      | 1.394       | 0.500    | 1.120    | 296            | 79            | 294            | 174           |
| YNR046W   | TRM112 | 0.445      | 0.827       | 1.076    | 2.406    | 141            | 81            | 236            | 300           |
| YGL099W   | LSG1   | 0.446      | 0.366       | 1.794    | 4.005    | 118            | 113           | 447            | 946           |
| YJL122W   | ALB1   | 0.448      | 0.208       | 0.549    | 1.218    | 99             | 29            | 659            | 424           |
| YCL061C   | MRC1   | 0.449      | 1.524       | 0.953    | 2.110    | 230            | 117           | 209            | 233           |
| YJL172W   | CPS1   | 0.450      | 3.114       | 2.671    | 5.906    | 578            | 824           | 257            | 802           |
| YCL057W   | PRD1   | 0.450      | 2.891       | 1.504    | 3.324    | 806            | 647           | 386            | 678           |
| YDL014W   | NOP1   | 0.450      | 0.202       | 1.493    | 3.298    | 281            | 224           | 1928           | 3360          |
| YJL010C   | NOP9   | 0.453      | 0.305       | 0.557    | 1.223    | 175            | 52            | 794            | 513           |
| YEL046C   | GLY1   | 0.453      | 0.363       | 1.991    | 4.371    | 192            | 204           | 733            | 1693          |
| YGR116W   | SPT6   | 0.454      | 1.271       | 1.580    | 3.463    | 971            | 819           | 1058           | 1936          |
| YAL025C   | MAK16  | 0.454      | 0.273       | 0.453    | 0.993    | 219            | 53            | 1109           | 582           |

Continued on next page



Table S7: Translational Regulation in Response to Starvation, continued

| CDS       | Gene  | Tri Change | mRNA Change | Tri NoAA | Tri Rich | # mRNA<br>NoAA | # Rib<br>NoAA | # mRNA<br>Rich | # Rib<br>Rich |
|-----------|-------|------------|-------------|----------|----------|----------------|---------------|----------------|---------------|
| YAL012W   | CYS3  | 0.457      | 8.604       | 5.764    | 12.537   | 3225           | 9923          | 519            | 3438          |
| YNL248C   | RPA49 | 0.460      | 0.179       | 0.741    | 1.602    | 187            | 74            | 1448           | 1226          |
| YBR079C   | RPG1  | 0.462      | 0.528       | 1.689    | 3.635    | 600            | 541           | 1572           | 3019          |
| YOR074C   | CDC21 | 0.463      | 2.105       | 3.055    | 6.559    | 111            | 181           | 73             | 253           |
| YDL112W   | TRM3  | 0.463      | 0.420       | 0.725    | 1.557    | 217            | 84            | 716            | 589           |
| YLR438W   | CAR2  | 0.465      | 3.125       | 6.016    | 12.884   | 246            | 790           | 109            | 742           |
| YJR070C   | LIA1  | 0.466      | 0.157       | 1.371    | 2.924    | 138            | 101           | 1218           | 1882          |
| YHL030W   | ECM29 | 0.470      | 3.019       | 1.472    | 3.118    | 835            | 656           | 383            | 631           |
| YCR072C   | RSA4  | 0.470      | 0.228       | 0.382    | 0.808    | 108            | 22            | 656            | 280           |
| YCL043C   | PDI1  | 0.470      | 2.392       | 2.732    | 5.781    | 3028           | 4416          | 1753           | 5354          |
| YPR086W   | SUA7  | 0.473      | 1.223       | 0.583    | 1.226    | 537            | 167           | 608            | 394           |
| YJL050W   | MTR4  | 0.473      | 0.137       | 0.792    | 1.666    | 168            | 71            | 1701           | 1497          |
| YMR079W   | SEC14 | 0.474      | 1.493       | 3.017    | 6.337    | 511            | 823           | 474            | 1587          |
| YLR044C   | PDC1  | 0.474      | 1.227       | 8.992    | 18.874   | 10057          | 48270         | 11349          | 113172        |
| YER178W   | PDA1  | 0.475      | 2.109       | 3.758    | 7.865    | 1205           | 2417          | 791            | 3287          |
| YOR272W   | YTM1  | 0.476      | 0.160       | 0.365    | 0.764    | 159            | 31            | 1380           | 557           |
| YLR002C   | NOC3  | 0.477      | 0.198       | 0.516    | 1.077    | 156            | 43            | 1093           | 622           |
| YLR259C   | HSP60 | 0.479      | 1.542       | 6.140    | 12.750   | 1282           | 4202          | 1151           | 7754          |
| YCL024W   | KCC4  | 0.480      | 0.947       | 0.390    | 0.808    | 173            | 36            | 253            | 108           |
| YHR094C   | HXT1  | 0.481      | 1.115       | 1.107    | 2.290    | 430            | 254           | 534            | 646           |
| YKL101W   | HSL1  | 0.483      | 1.042       | 0.773    | 1.593    | 395            | 163           | 525            | 442           |
| YJR002W   | MPP10 | 0.483      | 0.317       | 0.316    | 0.652    | 367            | 62            | 1605           | 553           |
| YJR131W   | MNS1  | 0.483      | 1.945       | 1.175    | 2.418    | 177            | 111           | 126            | 161           |
| YPR112C   | MRD1  | 0.484      | 0.139       | 0.441    | 0.905    | 204            | 48            | 2028           | 970           |
| YLR056W   | ERG3  | 0.486      | 0.611       | 1.009    | 2.067    | 609            | 328           | 1380           | 1507          |
| YKL216W   | URA1  | 0.489      | 1.682       | 0.672    | 1.366    | 4980           | 1787          | 4100           | 2960          |
| YOR007C   | SGT2  | 0.490      | 1.736       | 1.050    | 2.133    | 2873           | 1611          | 2292           | 2583          |
| YDR243C   | PRP28 | 0.490      | 1.232       | 0.506    | 1.028    | 259            | 70            | 291            | 158           |
| YHR039C-A | VMA10 | 0.491      | 1.439       | 2.927    | 5.936    | 633            | 989           | 609            | 1910          |
| YOR204W   | DED1  | 0.491      | 0.540       | 6.357    | 12.875   | 267            | 906           | 684            | 4653          |
| YOR274W   | MOD5  | 2.037      | 0.376       | 0.633    | 0.309    | 148            | 50            | 545            | 89            |
| YPL064C   | CWC27 | 2.038      | 0.876       | 0.473    | 0.231    | 436            | 110           | 689            | 84            |
| YFR015C   | GSY1  | 2.039      | 6.128       | 1.651    | 0.806    | 447            | 394           | 101            | 43            |
| YJR101W   | RSM26 | 2.040      | 0.473       | 0.640    | 0.312    | 325            | 111           | 952            | 157           |
| YKR051W   |       | 2.040      | 1.144       | 0.474    | 0.231    | 352            | 89            | 426            | 52            |
| YHR198C   |       | 2.041      | 0.882       | 1.194    | 0.582    | 149            | 95            | 234            | 72            |

*Continued on next page*

Table S7: Translational Regulation in Response to Starvation, continued

| CDS       | Gene   | Tri Change | mRNA Change | Tri NoAA | Tri Rich | # mRNA<br>NoAA | # Rib<br>NoAA | # mRNA<br>Rich | # Rib<br>Rich |
|-----------|--------|------------|-------------|----------|----------|----------------|---------------|----------------|---------------|
| YIL007C   | NAS2   | 2.042      | 0.984       | 0.889    | 0.433    | 177            | 84            | 249            | 57            |
| YER069W   | ARG5,6 | 2.045      | 3.011       | 1.775    | 0.864    | 572            | 542           | 263            | 120           |
| YIL116W   | HIS5   | 2.059      | 2.087       | 0.902    | 0.436    | 2881           | 1387          | 1911           | 440           |
| YER130C   |        | 2.069      | 0.491       | 0.600    | 0.288    | 228            | 73            | 643            | 98            |
| YDR305C   | HNT2   | 2.076      | 0.694       | 0.825    | 0.395    | 168            | 74            | 335            | 70            |
| YDR533C   | HSP31  | 2.086      | 1.358       | 1.246    | 0.594    | 203            | 135           | 207            | 65            |
| YHR090C   | YNG2   | 2.098      | 0.724       | 0.641    | 0.304    | 228            | 78            | 436            | 70            |
| YJL179W   | PF1D1  | 2.108      | 0.381       | 1.561    | 0.737    | 174            | 145           | 632            | 246           |
| YBL015W   | ACH1   | 2.114      | 1.083       | 3.710    | 1.746    | 151            | 299           | 193            | 178           |
| YBR157C   | ICS2   | 2.119      | 0.341       | 0.937    | 0.440    | 122            | 61            | 495            | 115           |
| YHR009C   |        | 2.126      | 0.645       | 1.024    | 0.479    | 366            | 200           | 786            | 199           |
| YGL098W   | USE1   | 2.127      | 0.859       | 0.849    | 0.397    | 278            | 126           | 448            | 94            |
| YPR101W   | SNT309 | 2.132      | 0.596       | 0.747    | 0.348    | 271            | 108           | 630            | 116           |
| YPL051W   | ARL3   | 2.145      | 0.844       | 0.953    | 0.442    | 175            | 89            | 287            | 67            |
| YGR108W   | CLB1   | 2.148      | 0.381       | 0.439    | 0.203    | 499            | 117           | 1814           | 195           |
| YBR067C   | TIP1   | 2.154      | 0.508       | 5.114    | 2.362    | 418            | 1141          | 1140           | 1423          |
| YBR175W   | SWD3   | 2.156      | 0.624       | 0.330    | 0.152    | 437            | 77            | 969            | 78            |
| YLR058C   | SHM2   | 2.165      | 2.316       | 4.972    | 2.285    | 7940           | 21074         | 4747           | 5730          |
| YNL274C   | GOR1   | 2.171      | 5.643       | 1.908    | 0.875    | 538            | 548           | 132            | 61            |
| YBR165W   | UBS1   | 2.171      | 0.709       | 0.774    | 0.355    | 276            | 114           | 539            | 101           |
| YMR233W   | TRI1   | 2.174      | 0.578       | 1.003    | 0.459    | 155            | 83            | 371            | 90            |
| YLR258W   | GSY2   | 2.174      | 4.130       | 1.119    | 0.512    | 1566           | 935           | 525            | 142           |
| YIL031W   | ULP2   | 2.175      | 0.716       | 1.684    | 0.770    | 89             | 80            | 172            | 70            |
| YBR290W   | BSD2   | 2.178      | 0.828       | 0.727    | 0.332    | 528            | 205           | 883            | 155           |
| YML107C   | PML39  | 2.193      | 0.699       | 0.548    | 0.249    | 246            | 72            | 487            | 64            |
| YER101C   | AST2   | 2.196      | 0.457       | 1.768    | 0.801    | 71             | 67            | 215            | 91            |
| YNL311C   |        | 2.197      | 0.698       | 0.632    | 0.286    | 240            | 81            | 476            | 72            |
| YJL180C   | ATP12  | 2.206      | 0.660       | 0.825    | 0.372    | 286            | 126           | 600            | 118           |
| YBL029C-A |        | 2.210      | 1.579       | 1.642    | 0.739    | 146            | 128           | 128            | 50            |
| YGR033C   | TIM21  | 2.214      | 0.497       | 0.635    | 0.285    | 431            | 146           | 1201           | 181           |
| YDR262W   |        | 2.231      | 0.536       | 1.394    | 0.622    | 211            | 157           | 545            | 179           |
| YAL040C   | CLN3   | 2.238      | 0.846       | 1.597    | 0.710    | 88             | 75            | 144            | 54            |
| YGR046W   | TAM41  | 2.244      | 0.972       | 0.696    | 0.309    | 323            | 120           | 460            | 75            |
| YNL065W   | AQR1   | 2.257      | 0.895       | 0.393    | 0.173    | 572            | 120           | 885            | 81            |
| YGL166W   | CUP2   | 2.264      | 0.669       | 0.639    | 0.281    | 267            | 91            | 553            | 82            |
| YPL202C   | AFT2   | 2.271      | 0.431       | 1.029    | 0.451    | 255            | 140           | 819            | 195           |

Continued on next page

Table S7: Translational Regulation in Response to Starvation, continued

| CDS       | Gene  | Tri Change | mRNA Change | Tri NoAA | Tri Rich | # mRNA<br>NoAA | # Rib<br>NoAA | # mRNA<br>Rich | # Rib<br>Rich |
|-----------|-------|------------|-------------|----------|----------|----------------|---------------|----------------|---------------|
| YDL044C   | MTF2  | 2.274      | 0.510       | 0.745    | 0.326    | 186            | 74            | 505            | 87            |
| YBL093C   | ROX3  | 2.278      | 0.502       | 0.775    | 0.339    | 389            | 161           | 1073           | 192           |
| YDR022C   | CIS1  | 2.287      | 1.771       | 1.372    | 0.597    | 142            | 104           | 111            | 35            |
| YGL055W   | OLE1  | 2.292      | 0.199       | 2.584    | 1.122    | 361            | 498           | 2515           | 1491          |
| YML038C   | YMD8  | 2.298      | 0.574       | 0.652    | 0.282    | 342            | 119           | 825            | 123           |
| YNL291C   | MID1  | 2.301      | 0.545       | 0.778    | 0.336    | 195            | 81            | 495            | 88            |
| YJL127C-B |       | 2.305      | 1.306       | 0.941    | 0.406    | 233            | 117           | 247            | 53            |
| YHR079C   | IRE1  | 2.319      | 0.477       | 1.471    | 0.631    | 93             | 73            | 270            | 90            |
| YHR106W   | TRR2  | 2.326      | 1.300       | 0.657    | 0.281    | 291            | 102           | 310            | 46            |
| YMR020W   | FMS1  | 2.328      | 1.464       | 0.352    | 0.151    | 532            | 100           | 503            | 40            |
| YJL133W   | MRS3  | 2.333      | 0.423       | 0.796    | 0.340    | 160            | 68            | 524            | 94            |
| YLR120C   | YPS1  | 2.335      | 0.418       | 3.340    | 1.424    | 106            | 189           | 351            | 264           |
| YDR174W   | HMO1  | 2.336      | 0.514       | 2.580    | 1.099    | 713            | 982           | 1922           | 1116          |
| YGR161C   | RTS3  | 2.359      | 0.298       | 1.959    | 0.826    | 66             | 69            | 307            | 134           |
| YFL027C   | GYP8  | 2.362      | 0.569       | 0.276    | 0.116    | 441            | 65            | 1074           | 66            |
| YPR009W   | SUT2  | 2.366      | 0.933       | 1.036    | 0.436    | 161            | 89            | 239            | 55            |
| YDL027C   |       | 2.366      | 1.262       | 1.102    | 0.463    | 216            | 127           | 237            | 58            |
| YGR183C   | QCR9  | 2.372      | 1.188       | 1.440    | 0.604    | 242            | 186           | 282            | 90            |
| YDR371W   | CTS2  | 2.372      | 0.946       | 0.591    | 0.248    | 339            | 107           | 496            | 65            |
| YHR136C   | SPL2  | 2.374      | 0.137       | 1.425    | 0.597    | 96             | 73            | 967            | 305           |
| YDL133W   |       | 2.377      | 0.665       | 0.465    | 0.195    | 411            | 102           | 856            | 88            |
| YPR167C   | MET16 | 2.385      | 16.343      | 0.745    | 0.311    | 3305           | 1315          | 280            | 46            |
| YOR385W   |       | 2.389      | 0.528       | 0.830    | 0.346    | 167            | 74            | 438            | 80            |
| YBR161W   | CSH1  | 2.394      | 0.611       | 0.900    | 0.374    | 154            | 74            | 349            | 69            |
| YDR055W   | PST1  | 2.396      | 0.982       | 2.301    | 0.956    | 653            | 802           | 921            | 465           |
| YKL006C-A | SFT1  | 2.406      | 0.376       | 0.859    | 0.355    | 133            | 61            | 490            | 92            |
| YBR262C   |       | 2.430      | 0.710       | 0.880    | 0.361    | 183            | 86            | 357            | 68            |
| YGL028C   | SCW11 | 2.440      | 0.264       | 3.090    | 1.260    | 211            | 348           | 1107           | 737           |
| YDR067C   |       | 2.446      | 0.869       | 0.577    | 0.235    | 344            | 106           | 548            | 68            |
| YGR065C   | VHT1  | 2.449      | 1.083       | 0.836    | 0.340    | 549            | 245           | 702            | 126           |
| YMR136W   | GAT2  | 2.464      | 1.076       | 2.818    | 1.138    | 115            | 173           | 148            | 89            |
| YPL168W   |       | 2.465      | 0.617       | 0.763    | 0.308    | 167            | 68            | 375            | 61            |
| YOL016C   | CMK2  | 2.466      | 0.761       | 0.725    | 0.293    | 700            | 271           | 1274           | 197           |
| YER103W   | SSA4  | 2.467      | 15.092      | 2.140    | 0.863    | 7412           | 8466          | 680            | 310           |
| YCR018C   | SRD1  | 2.469      | 0.486       | 0.999    | 0.403    | 165            | 88            | 470            | 100           |
| YMR274C   | RCE1  | 2.471      | 0.644       | 1.796    | 0.723    | 73             | 70            | 157            | 60            |

Continued on next page

Table S7: Translational Regulation in Response to Starvation, continued

| CDS       | Gene  | Tri Change | mRNA Change | Tri NoAA | Tri Rich | # mRNA<br>NoAA | # Rib<br>NoAA | # mRNA<br>Rich | # Rib<br>Rich |
|-----------|-------|------------|-------------|----------|----------|----------------|---------------|----------------|---------------|
| YHR195W   | NVJ1  | 2.471      | 0.922       | 0.461    | 0.186    | 455            | 112           | 683            | 67            |
| YBR192W   | RIM2  | 2.484      | 0.364       | 0.960    | 0.384    | 203            | 104           | 773            | 157           |
| YDL130W-A | STF1  | 2.486      | 6.223       | 4.054    | 1.622    | 409            | 885           | 91             | 78            |
| YOR166C   | SWT1  | 2.492      | 0.383       | 0.525    | 0.209    | 200            | 56            | 723            | 80            |
| YDR043C   | NRG1  | 2.498      | 0.479       | 2.036    | 0.811    | 92             | 100           | 266            | 114           |
| YOR092W   | ECM3  | 2.519      | 0.432       | 2.027    | 0.801    | 73             | 79            | 234            | 99            |
| YLR130C   | ZRT2  | 2.552      | 0.598       | 0.207    | 0.081    | 770            | 85            | 1784           | 76            |
| YML116W   | ATR1  | 2.556      | 0.860       | 0.381    | 0.148    | 531            | 108           | 855            | 67            |
| YGR149W   |       | 2.569      | 1.211       | 1.060    | 0.411    | 258            | 146           | 295            | 64            |
| YJL134W   | LCB3  | 2.589      | 0.345       | 0.803    | 0.309    | 252            | 108           | 1012           | 165           |
| YPL213W   | LEA1  | 2.609      | 0.824       | 0.810    | 0.309    | 259            | 112           | 435            | 71            |
| YIL117C   | PRM5  | 2.617      | 0.713       | 0.961    | 0.365    | 493            | 253           | 958            | 185           |
| YIL077C   |       | 2.655      | 1.004       | 0.833    | 0.312    | 198            | 88            | 273            | 45            |
| YKL068W-A |       | 2.656      | 0.830       | 3.009    | 1.127    | 160            | 257           | 267            | 159           |
| YBR145W   | ADH5  | 2.659      | 2.648       | 1.412    | 0.528    | 459            | 346           | 240            | 67            |
| YOL048C   |       | 2.664      | 2.400       | 0.567    | 0.212    | 449            | 136           | 259            | 29            |
| YMR120C   | ADE17 | 2.686      | 2.409       | 2.579    | 0.955    | 9901           | 13630         | 5690           | 2872          |
| YDR019C   | GCV1  | 2.702      | 3.057       | 0.967    | 0.356    | 6464           | 3338          | 2928           | 551           |
| YDL110C   | TMA17 | 2.739      | 4.775       | 3.214    | 1.167    | 369            | 633           | 107            | 66            |
| YGR019W   | UGA1  | 2.742      | 1.803       | 2.079    | 0.754    | 565            | 627           | 434            | 173           |
| YLR271W   |       | 2.756      | 2.378       | 0.821    | 0.296    | 395            | 173           | 230            | 36            |
| YMR291W   |       | 2.764      | 1.328       | 6.009    | 2.163    | 188            | 603           | 196            | 224           |
| YER175C   | TMT1  | 2.775      | 2.518       | 0.982    | 0.352    | 391            | 205           | 215            | 40            |
| YDL021W   | GPM2  | 2.782      | 4.535       | 0.706    | 0.252    | 393            | 148           | 120            | 16            |
| YNL142W   | MEP2  | 2.809      | 7.282       | 0.538    | 0.191    | 731            | 210           | 139            | 14            |
| YNL183C   | NPR1  | 2.811      | 0.779       | 2.890    | 1.023    | 153            | 236           | 272            | 147           |
| YBR085C-A |       | 2.835      | 2.896       | 1.809    | 0.635    | 1284           | 1240          | 614            | 206           |
| YGR150C   |       | 2.887      | 0.677       | 0.610    | 0.210    | 264            | 86            | 540            | 60            |
| YDL215C   | GDH2  | 2.900      | 0.881       | 0.668    | 0.229    | 1041           | 371           | 1636           | 198           |
| YCR037C   | PHO87 | 2.902      | 0.648       | 0.507    | 0.174    | 525            | 142           | 1122           | 103           |
| YMR319C   | FET4  | 2.945      | 0.135       | 0.489    | 0.165    | 268            | 70            | 2748           | 240           |
| YPL265W   | DIP5  | 2.985      | 0.434       | 1.331    | 0.444    | 1181           | 839           | 3767           | 883           |
| YLR407W   |       | 3.016      | 0.165       | 0.854    | 0.282    | 158            | 72            | 1324           | 197           |
| YOL002C   | IZH2  | 3.040      | 0.372       | 0.568    | 0.186    | 498            | 151           | 1853           | 182           |
| YDR074W   | TPS2  | 3.057      | 1.643       | 3.824    | 1.244    | 731            | 1492          | 616            | 405           |
| YKR093W   | PTR2  | 3.077      | 0.205       | 12.575   | 4.065    | 66             | 443           | 446            | 958           |

Continued on next page

Table S7: Translational Regulation in Response to Starvation, continued

| CDS       | Gene   | Trl Change | mRNA Change | Trl NoAA | Trl Rich | # mRNA<br>NoAA | # Rib<br>NoAA | # mRNA<br>Rich | # Rib<br>Rich |
|-----------|--------|------------|-------------|----------|----------|----------------|---------------|----------------|---------------|
| YPR026W   | ATH1   | 3.118      | 1.953       | 1.379    | 0.440    | 182            | 134           | 129            | 30            |
| YML100W   | TSL1   | 3.126      | 4.346       | 6.854    | 2.181    | 700            | 2561          | 223            | 257           |
| YDR391C   |        | 3.162      | 1.581       | 1.899    | 0.598    | 217            | 220           | 190            | 60            |
| YJL193W   |        | 3.247      | 0.295       | 0.825    | 0.253    | 134            | 59            | 629            | 84            |
| YOL011W   | PLB3   | 3.273      | 0.390       | 1.573    | 0.478    | 106            | 89            | 376            | 95            |
| YPR035W   | GLN1   | 3.323      | 0.751       | 3.194    | 0.956    | 4745           | 8090          | 8747           | 4420          |
| YNL036W   | NCE103 | 3.346      | 1.222       | 3.168    | 0.942    | 764            | 1292          | 866            | 431           |
| YOR273C   | TPO4   | 3.425      | 0.922       | 1.095    | 0.318    | 301            | 176           | 452            | 76            |
| YPL245W   |        | 3.435      | 0.119       | 0.671    | 0.194    | 120            | 43            | 1392           | 143           |
| YGL125W   | MET13  | 3.437      | 5.425       | 9.046    | 2.619    | 286            | 1381          | 73             | 101           |
| YLR177W   |        | 3.490      | 2.237       | 0.987    | 0.281    | 315            | 166           | 195            | 29            |
| YIL136W   | OM45   | 3.531      | 3.369       | 1.372    | 0.387    | 691            | 506           | 284            | 58            |
| YMR250W   | GAD1   | 3.586      | 6.772       | 1.250    | 0.347    | 1521           | 1015          | 311            | 57            |
| YGL215W   | CLG1   | 3.704      | 0.885       | 2.797    | 0.751    | 211            | 315           | 330            | 131           |
| YKR080W   | MTD1   | 3.784      | 1.120       | 1.017    | 0.267    | 3521           | 1911          | 4354           | 615           |
| YBL075C   | SSA3   | 3.998      | 1.016       | 1.053    | 0.262    | 265            | 149           | 361            | 50            |
| YOR161C   | PNS1   | 4.019      | 2.475       | 1.937    | 0.480    | 529            | 547           | 296            | 75            |
| YJL133C-A |        | 4.088      | 2.183       | 5.396    | 1.313    | 309            | 890           | 196            | 136           |
| YOR028C   | CIN5   | 4.107      | 0.887       | 2.313    | 0.560    | 132            | 163           | 206            | 61            |
| YLR178C   | TFS1   | 4.120      | 7.759       | 3.649    | 0.881    | 650            | 1266          | 116            | 54            |
| YLL019C   | KNS1   | 4.198      | 1.372       | 2.115    | 0.501    | 217            | 245           | 219            | 58            |
| YLR092W   | SUL2   | 4.229      | 18.068      | 2.176    | 0.512    | 1592           | 1849          | 122            | 33            |
| YNL160W   | YGP1   | 4.332      | 3.517       | 5.068    | 1.164    | 475            | 1285          | 187            | 115           |
| YBR296C   | PHO89  | 4.332      | 0.103       | 1.295    | 0.298    | 94             | 65            | 1266           | 199           |
| YMR196W   |        | 4.930      | 7.411       | 1.653    | 0.334    | 1488           | 1313          | 278            | 49            |
| YCR005C   | CIT2   | 5.123      | 0.345       | 0.622    | 0.121    | 4623           | 1536          | 18569          | 1186          |
| YOL082W   | ATG19  | 5.244      | 1.051       | 1.374    | 0.261    | 529            | 388           | 697            | 96            |
| YML128C   | MSC1   | 5.520      | 13.058      | 1.648    | 0.297    | 3065           | 2696          | 325            | 51            |
| YMR090W   |        | 5.773      | 2.309       | 0.746    | 0.129    | 442            | 176           | 265            | 18            |
| YHL021C   |        | 5.841      | 1.424       | 7.465    | 1.272    | 329            | 1311          | 320            | 215           |
| YEL009C   | GCN4   | 6.031      | 0.799       | 0.697    | 0.115    | 1500           | 558           | 2601           | 158           |
| YHR137W   | ARO9   | 6.128      | 0.054       | 2.186    | 0.355    | 78             | 91            | 2000           | 375           |
| YMR105C   | PGM2   | 6.162      | 10.266      | 5.526    | 0.892    | 1038           | 3062          | 140            | 66            |
| YPR184W   | GDB1   | 6.577      | 3.103       | 3.244    | 0.491    | 242            | 419           | 108            | 28            |
| YDR379C-A |        | 6.597      | 1.636       | 2.489    | 0.375    | 143            | 190           | 121            | 24            |
| YOR222W   | ODC2   | 7.008      | 0.464       | 0.589    | 0.084    | 334            | 105           | 996            | 44            |

Continued on next page

Table S7: Translational Regulation in Response to Starvation, continued

| CDS     | Gene | Trl Change | mRNA Change | Trl NoAA | Trl Rich | # mRNA<br>NoAA | # Rib<br>NoAA | # mRNA<br>Rich | # Rib<br>Rich |
|---------|------|------------|-------------|----------|----------|----------------|---------------|----------------|---------------|
| YER081W | SER3 | 10.225     | 9.462       | 2.546    | 0.248    | 10701          | 14545         | 1566           | 205           |
| YLL055W | YCT1 | 12.579     | 1.518       | 0.937    | 0.074    | 308            | 154           | 281            | 11            |
| YGR088W | CTT1 | 12.586     | 3.359       | 2.265    | 0.179    | 359            | 434           | 148            | 14            |
| YKR058W | GLG1 | 13.050     | 1.567       | 1.552    | 0.118    | 163            | 135           | 144            | 9             |
| YOR120W | GCY1 | 13.562     | 3.061       | 1.255    | 0.092    | 409            | 274           | 185            | 9             |

**Table S7.** Translational Regulation in Response to Starvation. Genes whose translational efficiency changed at least 2-fold in either direction upon starvation, relative to the median gene, are listed in order of fold-change. The ratios of translational efficiency and of mRNA abundance are listed, along with the translational efficiency in starvation and in log-phase growth. The total number of ribosome footprint and mRNA fragment sequencing reads are listed as well.

**Table S8A: GO Terms Over-represented in Genes that are Translationally Upregulated upon Starvation**

| <b>GO Term</b>                                      | <b>GO ID</b> | <b>log<sub>10</sub> <i>p</i> value</b> | <b>Expected</b> | <b>Actual</b> | <b>Total</b> |
|-----------------------------------------------------|--------------|----------------------------------------|-----------------|---------------|--------------|
| ion transport                                       | GO:0006811   | -5.4                                   | 12.5            | 29            | 85           |
| metal ion transport                                 | GO:0030001   | -4.1                                   | 6.4             | 17            | 44           |
| energy derivation by oxidation of organic compounds | GO:0015980   | -4.0                                   | 14.4            | 29            | 98           |

**Table S8B: GO Terms Under-represented in Genes that are Translationally Upregulated upon Starvation**

| GO Term                                                               | GO ID      | log <sub>10</sub> p value | Expected | Actual | Total |
|-----------------------------------------------------------------------|------------|---------------------------|----------|--------|-------|
| cellular component organization and biogenesis                        | GO:0016043 | -14.0                     | 240.5    | 159    | 1642  |
| organelle organization and biogenesis                                 | GO:0006996 | -11.1                     | 143.7    | 82     | 981   |
| cellular process                                                      | GO:0009987 | -10.1                     | 439.8    | 381    | 3002  |
| ribonucleoprotein complex biogenesis and assembly                     | GO:0022613 | -10.0                     | 44.1     | 11     | 301   |
| ribosome biogenesis and assembly                                      | GO:0042254 | -9.0                      | 36.3     | 8      | 248   |
| macromolecule metabolic process                                       | GO:0043170 | -5.3                      | 255.8    | 208    | 1746  |
| cellular component assembly                                           | GO:0022607 | -5.2                      | 48.3     | 23     | 330   |
| primary metabolic process                                             | GO:0044238 | -4.5                      | 303.5    | 260    | 2072  |
| DNA metabolic process                                                 | GO:0006259 | -4.3                      | 52.9     | 29     | 361   |
| biopolymer metabolic process                                          | GO:0043283 | -4.3                      | 196.3    | 156    | 1340  |
| protein-RNA complex assembly                                          | GO:0022618 | -4.1                      | 15.1     | 3      | 103   |
| nucleobase, nucleoside, nucleotide and nucleic acid metabolic process | GO:0006139 | -4.1                      | 152.5    | 116    | 1041  |
| cellular metabolic process                                            | GO:0044237 | -4.1                      | 317.3    | 276    | 2166  |
| binding                                                               | GO:0005488 | -4.5                      | 121.3    | 86     | 828   |
| ATPase activity                                                       | GO:0016887 | -4.4                      | 22.6     | 7      | 154   |
| ATPase activity, coupled                                              | GO:0042623 | -4.0                      | 14.8     | 3      | 101   |
| macromolecular complex                                                | GO:0032991 | -9.6                      | 183.1    | 121    | 1250  |
| non-membrane-bound organelle                                          | GO:0043228 | -9.1                      | 96.0     | 49     | 655   |
| intracellular non-membrane-bound organelle                            | GO:0043232 | -9.1                      | 96.0     | 49     | 655   |
| intracellular part                                                    | GO:0044424 | -7.8                      | 491.4    | 451    | 3354  |
| intracellular                                                         | GO:0005622 | -7.7                      | 495.9    | 457    | 3385  |
| protein complex                                                       | GO:0043234 | -6.9                      | 143.0    | 95     | 976   |
| organelle part                                                        | GO:0044422 | -6.5                      | 234.5    | 181    | 1601  |
| intracellular organelle part                                          | GO:0044446 | -6.5                      | 234.5    | 181    | 1601  |
| nucleolus                                                             | GO:0005730 | -6.5                      | 24.6     | 5      | 168   |
| nuclear part                                                          | GO:0044428 | -6.0                      | 103.9    | 65     | 709   |
| cytosolic ribosome (sensu Eukaryota)                                  | GO:0005830 | -5.8                      | 12.2     | 0      | 83    |
| cytosolic part                                                        | GO:0044445 | -5.7                      | 14.6     | 1      | 100   |
| nuclear lumen                                                         | GO:0031981 | -5.3                      | 64.5     | 35     | 440   |
| cell part                                                             | GO:0044464 | -5.0                      | 524.3    | 502    | 3579  |
| cell                                                                  | GO:0005623 | -5.0                      | 524.3    | 502    | 3579  |
| cell cortex part                                                      | GO:0044448 | -4.5                      | 12.0     | 1      | 82    |
| nucleus                                                               | GO:0005634 | -4.1                      | 196.3    | 157    | 1340  |
| organelle                                                             | GO:0043226 | -4.1                      | 407.3    | 370    | 2780  |
| intracellular organelle                                               | GO:0043229 | -4.1                      | 407.1    | 370    | 2779  |

*Continued on next page*



Table S8B: GO Terms Under-represented in Genes that are Translationally Upregulated upon Starvation, continued

| <b>GO Term</b> | <b>GO ID</b> | <b>log<sub>10</sub> <i>p</i> value</b> | <b>Expected</b> | <b>Actual</b> | <b>Total</b> |
|----------------|--------------|----------------------------------------|-----------------|---------------|--------------|
| cell cortex    | GO:0005938   | -4.1                                   | 13.0            | 2             | 89           |

**Table S8C: GO Terms Over-represented in Genes that are Translationally Downregulated upon Starvation**

| GO Term                                                                                   | GO ID      | log <sub>10</sub> p value | Expected | Actual | Total |
|-------------------------------------------------------------------------------------------|------------|---------------------------|----------|--------|-------|
| ribonucleoprotein complex biogenesis and assembly                                         | GO:0022613 | -46.6                     | 39.0     | 135    | 301   |
| ribosome biogenesis and assembly                                                          | GO:0042254 | -40.9                     | 32.1     | 115    | 248   |
| rRNA metabolic process                                                                    | GO:0016072 | -25.3                     | 18.0     | 68     | 139   |
| rRNA processing                                                                           | GO:0006364 | -24.7                     | 17.4     | 66     | 134   |
| organelle organization and biogenesis                                                     | GO:0006996 | -17.9                     | 127.1    | 210    | 981   |
| RNA processing                                                                            | GO:0006396 | -16.1                     | 39.5     | 92     | 305   |
| cellular component organization and biogenesis                                            | GO:0016043 | -14.8                     | 212.7    | 294    | 1642  |
| ribosomal large subunit biogenesis and assembly                                           | GO:0042273 | -13.8                     | 7.1      | 31     | 55    |
| cellular process                                                                          | GO:0009987 | -13.7                     | 388.8    | 447    | 3002  |
| protein-RNA complex assembly                                                              | GO:0022618 | -12.1                     | 13.3     | 42     | 103   |
| RNA metabolic process                                                                     | GO:0016070 | -10.4                     | 94.0     | 150    | 726   |
| macromolecule metabolic process                                                           | GO:0043170 | -8.2                      | 226.1    | 285    | 1746  |
| metabolic process                                                                         | GO:0008152 | -8.1                      | 290.4    | 347    | 2242  |
| primary metabolic process                                                                 | GO:0044238 | -8.1                      | 268.3    | 326    | 2072  |
| ribosome assembly                                                                         | GO:0042255 | -7.5                      | 5.8      | 21     | 45    |
| cellular metabolic process                                                                | GO:0044237 | -7.4                      | 280.5    | 335    | 2166  |
| maturation of 5.8S rRNA                                                                   | GO:0000460 | -7.1                      | 3.4      | 15     | 26    |
| maturation of 5.8S rRNA from tricistronic rRNA transcript (SSU-rRNA, 5.8S rRNA, LSU-rRNA) | GO:0000466 | -7.1                      | 3.4      | 15     | 26    |
| maturation of SSU-rRNA                                                                    | GO:0030490 | -6.9                      | 3.9      | 16     | 30    |
| maturation of SSU-rRNA from tricistronic rRNA transcript (SSU-rRNA, 5.8S rRNA, LSU-rRNA)  | GO:0000462 | -6.9                      | 3.9      | 16     | 30    |
| ribosomal large subunit assembly and maintenance                                          | GO:0000027 | -6.4                      | 4.1      | 16     | 32    |
| ribosomal subunit assembly                                                                | GO:0042257 | -6.1                      | 4.8      | 17     | 37    |
| nucleobase, nucleoside, nucleotide and nucleic acid metabolic process                     | GO:0006139 | -6.0                      | 134.8    | 180    | 1041  |
| cellular component assembly                                                               | GO:0022607 | -5.7                      | 42.7     | 72     | 330   |
| biopolymer metabolic process                                                              | GO:0043283 | -5.5                      | 173.5    | 219    | 1340  |
| macromolecular complex assembly                                                           | GO:0065003 | -5.0                      | 32.1     | 56     | 248   |
| hexose catabolic process                                                                  | GO:0019320 | -4.3                      | 3.0      | 11     | 23    |
| glucose catabolic process                                                                 | GO:0006007 | -4.3                      | 3.0      | 11     | 23    |
| maturation of LSU-rRNA from tricistronic rRNA transcript (SSU-rRNA, 5.8S rRNA, LSU-rRNA)  | GO:0000463 | -4.3                      | 1.7      | 8      | 13    |
| maturation of LSU-rRNA                                                                    | GO:0000470 | -4.3                      | 1.7      | 8      | 13    |
| organic acid metabolic process                                                            | GO:0006082 | -4.1                      | 28.8     | 49     | 222   |
| carboxylic acid metabolic process                                                         | GO:0019752 | -4.1                      | 28.8     | 49     | 222   |
| RNA modification                                                                          | GO:0009451 | -4.1                      | 6.3      | 17     | 49    |
| RNA helicase activity                                                                     | GO:0003724 | -9.9                      | 4.3      | 20     | 33    |
| RNA-dependent ATPase activity                                                             | GO:0008186 | -9.3                      | 3.0      | 16     | 23    |

*Continued on next page*

Table S8C: GO Terms Over-represented in Genes that are Translationally Downregulated upon Starvation, continued

| <b>GO Term</b>                                    | <b>GO ID</b> | <b>log<sub>10</sub> p value</b> | <b>Expected</b> | <b>Actual</b> | <b>Total</b> |
|---------------------------------------------------|--------------|---------------------------------|-----------------|---------------|--------------|
| ATP-dependent RNA helicase activity               | GO:0004004   | -8.5                            | 2.8             | 15            | 22           |
| nucleic acid binding                              | GO:0003676   | -7.5                            | 47.8            | 84            | 369          |
| helicase activity                                 | GO:0004386   | -7.1                            | 6.6             | 22            | 51           |
| RNA binding                                       | GO:0003723   | -6.8                            | 24.2            | 50            | 187          |
| snoRNA binding                                    | GO:0030515   | -6.5                            | 3.6             | 15            | 28           |
| binding                                           | GO:0005488   | -5.9                            | 107.2           | 149           | 828          |
| ATP-dependent helicase activity                   | GO:0008026   | -5.7                            | 4.5             | 16            | 35           |
| translation factor activity, nucleic acid binding | GO:0008135   | -5.4                            | 4.3             | 15            | 33           |
| translation regulator activity                    | GO:0045182   | -5.2                            | 4.9             | 16            | 38           |
| ATPase activity                                   | GO:0016887   | -4.4                            | 19.9            | 38            | 154          |
| nucleolus                                         | GO:0005730   | -37.0                           | 21.8            | 89            | 168          |
| non-membrane-bound organelle                      | GO:0043228   | -26.3                           | 84.8            | 176           | 655          |
| intracellular non-membrane-bound organelle        | GO:0043232   | -26.3                           | 84.8            | 176           | 655          |
| nuclear lumen                                     | GO:0031981   | -14.6                           | 57.0            | 114           | 440          |
| nucleolar part                                    | GO:0044452   | -12.6                           | 10.0            | 36            | 77           |
| nuclear part                                      | GO:0044428   | -11.3                           | 91.8            | 150           | 709          |
| small subunit processome                          | GO:0032040   | -8.8                            | 3.9             | 18            | 30           |
| organelle lumen                                   | GO:0043233   | -8.7                            | 81.9            | 130           | 632          |
| membrane-enclosed lumen                           | GO:0031974   | -8.7                            | 81.9            | 130           | 632          |
| ribonucleoprotein complex                         | GO:0030529   | -8.1                            | 48.2            | 86            | 372          |
| nucleus                                           | GO:0005634   | -7.0                            | 173.5           | 226           | 1340         |
| intracellular part                                | GO:0044424   | -5.6                            | 434.4           | 462           | 3354         |
| nucleolar preribosome                             | GO:0030685   | -5.4                            | 1.7             | 9             | 13           |
| preribosome                                       | GO:0030684   | -4.6                            | 1.9             | 9             | 15           |
| cytosol                                           | GO:0005829   | -4.5                            | 27.8            | 49            | 215          |
| cell part                                         | GO:0044464   | -4.5                            | 463.5           | 480           | 3579         |
| cell                                              | GO:0005623   | -4.5                            | 463.5           | 480           | 3579         |
| intracellular                                     | GO:0005622   | -4.4                            | 438.4           | 462           | 3385         |

**Table S8D: GO Terms Under-represented in Genes that are Translationally Downregulated upon Starvation**

| GO Term                | GO ID      | $\log_{10} p$ value | Expected | Actual | Total |
|------------------------|------------|---------------------|----------|--------|-------|
| membrane               | GO:0016020 | -5.2                | 101.5    | 66     | 784   |
| organellar ribosome    | GO:0000313 | -4.8                | 10.1     | 0      | 78    |
| mitochondrial ribosome | GO:0005761 | -4.8                | 10.1     | 0      | 78    |
| mitochondrial part     | GO:0044429 | -4.6                | 46.1     | 23     | 356   |
| organelle membrane     | GO:0031090 | -4.0                | 65.4     | 40     | 505   |

**Table S8.** GO term analysis of translational regulation in response to starvation. As in Table S2, except using the genes whose translational efficiency increase (552 genes; A,B) or decrease (488 genes; C,D) upon starvation is at least 1 standard deviation away from the median gene.

## References

- S1. U. Nagalakshmi, *et al.*, *Science* **320**, 1344 (2008).
- S2. A. Mortazavi, B. A. Williams, K. McCue, L. Schaeffer, B. Wold, *Nat. Methods* **5**, 621 (2008).
- S3. R. Lister, *et al.*, *Cell* **133**, 523 (2008).
- S4. E. Berezikov, E. Cuppen, R. H. Plasterk, *Nat. Genet.* **38**, S2 (2006).
- S5. E. Romaniuk, L. W. McLaughlin, T. Nielson, P. J. Romaniuk, *Eur. J. Biochem.* **125**, 639 (1982).
- S6. H. Fu, *et al.*, *FEBS Lett.* **579**, 3849 (2005).
- S7. R. Li, Y. Li, K. Kristiansen, J. Wang, *Bioinformatics* **24**, 713 (2008).
- S8. H. Miyasaka, *Yeast* **15**, 633 (1999).
- S9. F. Miura, *et al.*, *Proc. Natl. Acad. Sci. U.S.A.* **103**, 17846 (2006).
- S10. F. C. Holstege, *et al.*, *Cell* **95**, 717 (1998).
- S11. Y. Arava, *et al.*, *Proc. Natl. Acad. Sci. U.S.A.* **100**, 3889 (2003).
- S12. L. M. de Godoy, *et al.*, *Nature* **455**, 1251 (2008).
- S13. S. Ghaemmaghami, *et al.*, *Nature* **425**, 737 (2003).
- S14. M. Ashburner, *et al.*, *Nat. Genet.* **25**, 25 (2000).
- S15. S. Falcon, R. Gentleman, *Bioinformatics* **23**, 257 (2006).
